# Supplementary material for: Water oxidation by a dye-catalyst diad in natural sunlight: timing and coordination of excitations and reactions across timescales of picoseconds to hours
Source: Royal Society of Chemistry journal article supplement (doi:10.1039/d2sc06966k), 2023-01-01
Supplement: d2sc06966k1.pdf [file d2sc06966k1.pdf]

## Electronic Supplementary Information

### **Water oxidation by a dye-catalyst diad in natural sunlight: timing and coordination of excitations and reactions across timescales of picoseconds to seconds**

Ramzi N. Massad,<sup>1,2</sup> Thomas P. Cheshire,<sup>2</sup> Chenqi Fan,<sup>1,2</sup> and Frances A. Houle<sup>2\*</sup>

<sup>1</sup> College of Chemistry, University of California, Berkeley, Berkeley, CA 94720, USA.

<sup>2</sup> Chemical Sciences Division, Lawrence Berkeley National Laboratory, Berkeley, CA 94720, USA.

\*Corresponding author: fahoule@lbl.gov

#### Table of Contents:

|                           |    |
|---------------------------|----|
| 1. Reaction Scheme.....   | S2 |
| 2. Additional Figure..... | S7 |
| 3. References.....        | S8 |

## 1. Reaction Scheme

The reaction steps listed in Table S1 have the stoichiometries of the transformations of the species, written using the mnemonic dye – catalyst(oxidation state)-oxygen form when the dye is in the ground state, and dye-(dye electronic state) – catalyst(oxidation state)-oxygen form when the dye is in an electronically excited singlet state ( $X^*$ ,  $B^*$  or  $Y^*$ ) or triplet state ( $TN^*$ ). Each step includes a marker species (in italics) which does not influence the chemistry being simulated, but allows the occurrences of that particular step to be counted. This enables a much deeper analysis of the simulation results.

Table S1. Complete reaction scheme used for the simulations.

| Process                         | Process                                                   | Kinetic step                                                    | Rate coefficient <sup>a</sup>        |
|---------------------------------|-----------------------------------------------------------|-----------------------------------------------------------------|--------------------------------------|
| 1 <sup>st</sup> catalytic cycle | Dye photoexcitation                                       | Dye-cat(2)-OH2 => Dye-TN*-cat(2)-OH2 + <i>excitation-TN1</i>    | 18.3 s <sup>-1</sup>                 |
|                                 | Dye photoexcitation                                       | Dye-cat(2)-OH2 => Dye-Y*-cat(2)-OH2 + <i>excitation-Y1</i>      | 4.28 s <sup>-1</sup>                 |
|                                 | Dye photoexcitation                                       | Dye-cat(2)-OH2 => Dye-B*-cat(2)-OH2 + <i>excitation-B1</i>      | 13.2 s <sup>-1</sup>                 |
|                                 | Dye photoexcitation                                       | Dye-cat(2)-OH2 => Dye-X*-cat(2)-OH2 + <i>excitation-X1</i>      | 22.8 s <sup>-1</sup>                 |
|                                 | Dye photoexcitation                                       | Dye-cat(2)-OH2 => Dye-cat(2)-OH2 + <i>groundstatebleach-TN1</i> | 18.3 s <sup>-1</sup>                 |
|                                 | Dye photoexcitation                                       | Dye-cat(2)-OH2 => Dye-cat(2)-OH2 + <i>groundstatebleach-Y1</i>  | 4.28 s <sup>-1</sup>                 |
|                                 | Dye photoexcitation                                       | Dye-cat(2)-OH2 => Dye-cat(2)-OH2 + <i>groundstatebleach-B1</i>  | 13.2 s <sup>-1</sup>                 |
|                                 | Dye photoexcitation                                       | Dye-cat(2)-OH2 => Dye-cat(2)-OH2 + <i>groundstatebleach-X1</i>  | 22.8 s <sup>-1</sup>                 |
|                                 | Dye photoexcitation                                       | Dye-TN*-cat(2)-OH2 => Dye-cat(2)-OH2 + <i>emission-TN1</i>      | 18.3 s <sup>-1</sup>                 |
|                                 | Dye photoexcitation                                       | Dye-Y*-cat(2)-OH2 => Dye-cat(2)-OH2 + <i>emission-Y1</i>        | 4.28 s <sup>-1</sup>                 |
|                                 | Dye photoexcitation                                       | Dye-B*-cat(2)-OH2 => Dye-cat(2)-OH2 + <i>emission-B1</i>        | 13.2 s <sup>-1</sup>                 |
|                                 | Dye photoexcitation                                       | Dye-X*-cat(2)-OH2 => Dye-cat(2)-OH2 + <i>emission-X1</i>        | 22.8 s <sup>-1</sup>                 |
|                                 | Dye internal conversion                                   | Dye-Y*-cat(2)-OH2 => Dye-B*-cat(2)-OH2 + <i>IC_B1</i>           | 2.4x10 <sup>13</sup> s <sup>-1</sup> |
| Dye internal conversion         | Dye-B*-cat(2)-OH2 => Dye-X*-cat(2)-OH2 + <i>IC_X1</i>     | 2.4x10 <sup>13</sup> s <sup>-1</sup>                            |                                      |
| Dye intersystem crossing        | Dye-X*-cat(2)-OH2 => Dye-TN*-cat(2)-OH2 + <i>ISC1</i>     | 4 x 10 <sup>13</sup> s <sup>-1</sup>                            |                                      |
| Dye photoexcitation             | Dye-TN*-cat(2)-OH2 => Dye-TN*-cat(2)-OH2 + <i>esa-TN1</i> | 117 s <sup>-1</sup>                                             |                                      |
| Dye photoexcitation             | Dye-Y*-cat(2)-OH2 => Dye-Y*-cat(2)-OH2 + <i>esa-Y1</i>    | 117 s <sup>-1</sup>                                             |                                      |
| Dye photoexcitation             | Dye-B*-cat(2)-OH2 => Dye-B*-cat(2)-OH2 + <i>esa-B1</i>    | 117 s <sup>-1</sup>                                             |                                      |

|                                 |                                           |                                                                         |                                         |
|---------------------------------|-------------------------------------------|-------------------------------------------------------------------------|-----------------------------------------|
|                                 | Dye photoexcitation                       | Dye-X*-cat(2)-OH2 => Dye-X*-cat(2)-OH2 + <i>esa-X1</i>                  | 117 s <sup>-1</sup>                     |
|                                 | Dye radiative relaxation                  | Dye-TN*-cat(2)-OH2 => Dye-cat(2)-OH2 + <i>incoherentems-1</i>           | 9.6x10 <sup>4</sup> s <sup>-1</sup>     |
|                                 | Dye non-radiative relaxation              | Dye-TN*-cat(2)-OH2 => Dye-cat(2)-OH2 + <i>nr-ems-1</i>                  | 2.6x10 <sup>6</sup> s <sup>-1</sup>     |
|                                 | Dye – substrate injection                 | Dye-TN*-cat(2)-OH2 => Dye+-cat(2)-OH2 + <i>electron + injection-TN1</i> | 1.0x10 <sup>12</sup> s <sup>-1</sup>    |
|                                 | Dye – substrate injection                 | Dye-Y*-cat(2)-OH2 => Dye+-cat(2)-OH2 + <i>electron + injection-Y1</i>   | 1.0x10 <sup>12</sup> s <sup>-1</sup>    |
|                                 | Dye – substrate injection                 | Dye-B*-cat(2)-OH2 => Dye+-cat(2)-OH2 + <i>electron + injection-B1</i>   | 1.0x10 <sup>12</sup> s <sup>-1</sup>    |
|                                 | Dye – substrate injection                 | Dye-X*-cat(2)-OH2 => Dye+-cat(2)-OH2 + <i>electron + injection-X1</i>   | 1.0x10 <sup>12</sup> s <sup>-1</sup>    |
|                                 | Dye-catalyst <sup>electron</sup> transfer | Dye+-cat(2)-OH2 => Dye-cat(3)-OH2 + <i>groundstate1</i>                 | 6.9 x 10 <sup>9</sup> s <sup>-1 1</sup> |
|                                 | Back electron transfer                    | Dye+-cat(2)-OH2 + electron => Dye-cat(2)-OH2 + <i>BETox1</i>            | 100 s <sup>-1 2</sup>                   |
|                                 | Back electron transfer                    | Dye-cat(3)-OH2 + electron => Dye-cat(2)-OH2 + <i>BETcat1</i>            | 100 s <sup>-1 2</sup>                   |
| 2 <sup>nd</sup> catalytic cycle | Dye photoexcitation                       | Dye-cat(3)-OH2 => Dye-TN*-cat(3)-OH2 + <i>excitation-TN2</i>            | 18.3 s <sup>-1</sup>                    |
|                                 | Dye photoexcitation                       | Dye-cat(3)-OH2 => Dye-Y*-cat(3)-OH2 + <i>excitation-Y2</i>              | 4.28 s <sup>-1</sup>                    |
|                                 | Dye photoexcitation                       | Dye-cat(3)-OH2 => Dye-B*-cat(3)-OH2 + <i>excitation-B2</i>              | 13.2 s <sup>-1</sup>                    |
|                                 | Dye photoexcitation                       | Dye-cat(3)-OH2 => Dye-X*-cat(3)-OH2 + <i>excitation-X2</i>              | 22.8 s <sup>-1</sup>                    |
|                                 | Dye photoexcitation                       | Dye-cat(3)-OH2 => Dye-cat(3)-OH2 + <i>groundstatebleach-TN2</i>         | 18.3 s <sup>-1</sup>                    |
|                                 | Dye photoexcitation                       | Dye-cat(3)-OH2 => Dye-cat(3)-OH2 + <i>groundstatebleach-Y2</i>          | 4.28 s <sup>-1</sup>                    |
|                                 | Dye photoexcitation                       | Dye-cat(3)-OH2 => Dye-cat(3)-OH2 + <i>groundstatebleach-B2</i>          | 13.2 s <sup>-1</sup>                    |
|                                 | Dye photoexcitation                       | Dye-cat(3)-OH2 => Dye-cat(3)-OH2 + <i>groundstatebleach-X2</i>          | 22.8 s <sup>-1</sup>                    |
|                                 | Dye photoexcitation                       | Dye-TN*-cat(3)-OH2 => Dye-cat(3)-OH2 + <i>emission-TN2</i>              | 18.3 s <sup>-1</sup>                    |
|                                 | Dye photoexcitation                       | Dye-Y*-cat(3)-OH2 => Dye-cat(3)-OH2 + <i>emission-Y2</i>                | 4.28 s <sup>-1</sup>                    |
|                                 | Dye photoexcitation                       | Dye-B*-cat(3)-OH2 => Dye-cat(3)-OH2 + <i>emission-B2</i>                | 13.2 s <sup>-1</sup>                    |
|                                 | Dye photoexcitation                       | Dye-X*-cat(3)-OH2 => Dye-cat(3)-OH2 + <i>emission-X2</i>                | 22.8 s <sup>-1</sup>                    |
|                                 | Dye internal conversion                   | Dye-Y*-cat(3)-OH2 => Dye-B*-cat(3)-OH2 + <i>IC B2</i>                   | 2.4x10 <sup>13</sup> s <sup>-1</sup>    |
|                                 | Dye internal conversion                   | Dye-B*-cat(3)-OH2 => Dye-X*-cat(3)-OH2 + <i>IC X2</i>                   | 2.4x10 <sup>13</sup> s <sup>-1</sup>    |
|                                 | Dye intersystem crossing                  | Dye-X*-cat(3)-OH2 => Dye-TN*-cat(3)-OH2 + <i>ISC2</i>                   | 4 x 10 <sup>13</sup> s <sup>-1</sup>    |
|                                 | Dye photoexcitation                       | Dye-TN*-cat(3)-OH2 => Dye-TN*-cat(3)-OH2 + <i>esa-TN2</i>               | 117 s <sup>-1</sup>                     |

|                                 |                              |                                                                         |                                      |
|---------------------------------|------------------------------|-------------------------------------------------------------------------|--------------------------------------|
|                                 | Dye photoexcitation          | Dye-Y*-cat(3)-OH2 => Dye-Y*-cat(3)-OH2 + <i>esa-Y2</i>                  | 117 s <sup>-1</sup>                  |
|                                 | Dye photoexcitation          | Dye-B*-cat(3)-OH2 => Dye-B*-cat(3)-OH2 + <i>esa-B2</i>                  | 117 s <sup>-1</sup>                  |
|                                 | Dye photoexcitation          | Dye-X*-cat(3)-OH2 => Dye-X*-cat(3)-OH2 + <i>esa-X2</i>                  | 117 s <sup>-1</sup>                  |
|                                 | Dye radiative relaxation     | Dye-TN*-cat(3)-OH2 => Dye-cat(3)-OH2 + <i>incoherentems-2</i>           | 9.6x10 <sup>4</sup> s <sup>-1</sup>  |
|                                 | Dye non-radiative relaxation | Dye-TN*-cat(3)-OH2 => Dye-cat(3)-OH2 + <i>nr-ems-2</i>                  | 2.6x10 <sup>6</sup> s <sup>-1</sup>  |
|                                 | Dye – substrate injection    | Dye-TN*-cat(3)-OH2 => Dye+-cat(3)-OH2 + <i>electron + injection-TN2</i> | 1.0x10 <sup>12</sup> s <sup>-1</sup> |
|                                 | Dye – substrate injection    | Dye-Y*-cat(3)-OH2 => Dye+-cat(3)-OH2 + <i>electron + injection-Y2</i>   | 1.0x10 <sup>12</sup> s <sup>-1</sup> |
|                                 | Dye – substrate injection    | Dye-B*-cat(3)-OH2 => Dye+-cat(3)-OH2 + <i>electron + injection-B2</i>   | 1.0x10 <sup>12</sup> s <sup>-1</sup> |
|                                 | Dye – substrate injection    | Dye-X*-cat(3)-OH2 => Dye+-cat(3)-OH2 + <i>electron + injection-X2</i>   | 1.0x10 <sup>12</sup> s <sup>-1</sup> |
|                                 | 1 electron 2 proton transfer | Dye+-cat(3)-OH2 => Dye-cat(4)--O + 2 H+ + <i>protonrelease</i>          | 0.036 s <sup>-1 3</sup>              |
|                                 | Back electron transfer       | Dye+-cat(2)-OH2 + electron => Dye-cat(2)-OH2 + <i>BETox1</i>            | 100 s <sup>-1 2</sup>                |
| 3 <sup>rd</sup> catalytic cycle | Dye photoexcitation          | Dye-cat(4)--O => Dye-TN*- cat(4)--O + <i>excitation-TN3</i>             | 18.3 s <sup>-1</sup>                 |
|                                 | Dye photoexcitation          | Dye-cat(4)--O => Dye-Y*- cat(4)--O + <i>excitation-Y3</i>               | 4.28 s <sup>-1</sup>                 |
|                                 | Dye photoexcitation          | Dye-cat(4)--O => Dye-B*- cat(4)--O + <i>excitation-B3</i>               | 13.2 s <sup>-1</sup>                 |
|                                 | Dye photoexcitation          | Dye-cat(4)--O => Dye-X*- cat(4)--O + <i>excitation-X3</i>               | 22.8 s <sup>-1</sup>                 |
|                                 | Dye photoexcitation          | Dye-cat(4)--O => Dye-cat(4)--O + <i>groundstatebleach-TN3</i>           | 18.3 s <sup>-1</sup>                 |
|                                 | Dye photoexcitation          | Dye-cat(4)--O => Dye-cat(4)--O + <i>groundstatebleach-Y3</i>            | 4.28 s <sup>-1</sup>                 |
|                                 | Dye photoexcitation          | Dye-cat(4)--O => Dye-cat(4)--O + <i>groundstatebleach-B3</i>            | 13.2 s <sup>-1</sup>                 |
|                                 | Dye photoexcitation          | Dye-cat(4)--O => Dye-cat(4)--O + <i>groundstatebleach-X3</i>            | 22.8 s <sup>-1</sup>                 |
|                                 | Dye photoexcitation          | Dye-TN*- cat(4)--O => Dye-cat(4)--O + <i>emission-TN3</i>               | 18.3 s <sup>-1</sup>                 |
|                                 | Dye photoexcitation          | Dye-Y*- cat(4)--O => Dye-cat(4)--O + <i>emission-Y3</i>                 | 4.28 s <sup>-1</sup>                 |
|                                 | Dye photoexcitation          | Dye-B*- cat(4)--O => Dye-cat(4)--O + <i>emission-B3</i>                 | 13.2 s <sup>-1</sup>                 |
|                                 | Dye photoexcitation          | Dye-X*- cat(4)--O => Dye-cat(4)--O + <i>emission-X3</i>                 | 22.8 s <sup>-1</sup>                 |
|                                 | Dye internal conversion      | Dye-Y*- cat(4)--O => Dye-B*- cat(4)--O + <i>IC B3</i>                   | 2.4x10 <sup>13</sup> s <sup>-1</sup> |
|                                 | Dye internal conversion      | Dye-B*- cat(4)--O => Dye-X*- cat(4)--O + <i>IC X3</i>                   | 2.4x10 <sup>13</sup> s <sup>-1</sup> |
|                                 | Dye intersystem crossing     | Dye-X*- cat(4)--O => Dye-TN*- cat(4)--O + <i>ISC3</i>                   | 4 x 10 <sup>13</sup> s <sup>-1</sup> |

|                                 |                                |                                                                        |                                         |
|---------------------------------|--------------------------------|------------------------------------------------------------------------|-----------------------------------------|
|                                 | Dye photoexcitation            | Dye-TN*- cat(4)--O => Dye-TN*- cat(4)--O + <i>esa-TN3</i>              | 117 s <sup>-1</sup>                     |
|                                 | Dye photoexcitation            | Dye-Y*- cat(4)--O => Dye-Y*- cat(4)--O + <i>esa-Y3</i>                 | 117 s <sup>-1</sup>                     |
|                                 | Dye photoexcitation            | Dye-B*- cat(4)--O => Dye-B*- cat(4)--O + <i>esa-B3</i>                 | 117 s <sup>-1</sup>                     |
|                                 | Dye photoexcitation            | Dye-X*- cat(4)--O => Dye-X*- cat(4)--O + <i>esa-X3</i>                 | 117 s <sup>-1</sup>                     |
|                                 | Dye radiative relaxation       | Dye-TN*- cat(4)--O => Dye-cat(4)--O + <i>incoherentems-3</i>           | 9.6x10 <sup>4</sup> s <sup>-1</sup>     |
|                                 | Dye non-radiative relaxation   | Dye-TN*- cat(4)--O => Dye-cat(4)--O + <i>nr-ems-3</i>                  | 2.6x10 <sup>6</sup> s <sup>-1</sup>     |
|                                 | Dye – substrate injection      | Dye-TN*- cat(4)--O => Dye+-cat(4)--O + electron + <i>injection-TN3</i> | 1.0x10 <sup>12</sup> s <sup>-1</sup>    |
|                                 | Dye – substrate injection      | Dye-Y*- cat(4)--O => Dye+-cat(4)--O + electron + <i>injection-Y3</i>   | 1.0x10 <sup>12</sup> s <sup>-1</sup>    |
|                                 | Dye – substrate injection      | Dye-B*- cat(4)--O => Dye+-cat(4)--O + electron + <i>injection-B3</i>   | 1.0x10 <sup>12</sup> s <sup>-1</sup>    |
|                                 | Dye – substrate injection      | Dye-X*- cat(4)--O => Dye+-cat(4)--O + electron + <i>injection-X3</i>   | 1.0x10 <sup>12</sup> s <sup>-1</sup>    |
|                                 | Dye-catalyst electron transfer | Dye+-cat(4)--O => Dye-cat(5)--O + <i>groundstate3</i>                  | 6.9 x 10 <sup>9</sup> s <sup>-1 1</sup> |
|                                 | O-atom proton transfer         | Dye-cat(5)--O => Dye-cat(3)-OOH + H+ + <i>OOformation</i>              | 0.0096 s <sup>-1 4</sup>                |
|                                 | Back electron transfer         | Dye+-cat(4)--O + electron => Dye-cat(4)--O + <i>BETox3</i>             | 100 s <sup>-1 2</sup>                   |
|                                 | Back electron transfer         | Dye-cat(5)--O + electron => Dye-cat(4)--O + <i>BETcat3</i>             | 100 s <sup>-1 2</sup>                   |
| 4 <sup>th</sup> catalytic cycle | Dye photoexcitation            | Dye-cat(3)-OOH => Dye-TN*-cat(3)-OOH + <i>excitation-TN4</i>           | 18.3 s <sup>-1</sup>                    |
|                                 | Dye photoexcitation            | Dye-cat(3)-OOH => Dye-Y*-cat(3)-OOH + <i>excitation-Y4</i>             | 4.28 s <sup>-1</sup>                    |
|                                 | Dye photoexcitation            | Dye-cat(3)-OOH => Dye-B*-cat(3)-OOH + <i>excitation-B4</i>             | 13.2 s <sup>-1</sup>                    |
|                                 | Dye photoexcitation            | Dye-cat(3)-OOH => Dye-X*-cat(3)-OOH + <i>excitation-X4</i>             | 22.8 s <sup>-1</sup>                    |
|                                 | Dye photoexcitation            | Dye-cat(3)-OOH => Dye-cat(3)-OOH + <i>groundstatebleach-TN4</i>        | 18.3 s <sup>-1</sup>                    |
|                                 | Dye photoexcitation            | Dye-cat(3)-OOH => Dye-cat(3)-OOH + <i>groundstatebleach-Y4</i>         | 4.28 s <sup>-1</sup>                    |
|                                 | Dye photoexcitation            | Dye-cat(3)-OOH => Dye-cat(3)-OOH + <i>groundstatebleach-B4</i>         | 13.2 s <sup>-1</sup>                    |
|                                 | Dye photoexcitation            | Dye-cat(3)-OOH => Dye-cat(3)-OOH + <i>groundstatebleach-X4</i>         | 22.8 s <sup>-1</sup>                    |
|                                 | Dye photoexcitation            | Dye-TN*-cat(3)-OOH => Dye-cat(3)-OOH + <i>emission-TN4</i>             | 18.3 s <sup>-1</sup>                    |
|                                 | Dye photoexcitation            | Dye-Y*-cat(3)-OOH => Dye-cat(3)-OOH + <i>emission-Y4</i>               | 4.28 s <sup>-1</sup>                    |
|                                 | Dye photoexcitation            | Dye-B*-cat(3)-OOH => Dye-cat(3)-OOH + <i>emission-B4</i>               | 13.2 s <sup>-1</sup>                    |
|                                 | Dye photoexcitation            | Dye-X*-cat(3)-OOH => Dye-cat(3)-OOH + <i>emission-X4</i>               | 22.8 s <sup>-1</sup>                    |

|  |                                |                                                                                      |                                     |
|--|--------------------------------|--------------------------------------------------------------------------------------|-------------------------------------|
|  | Dye internal conversion        | Dye-Y*-cat(3)-OOH => Dye-B*-cat(3)-OOH + <i>IC B4</i>                                | $2.4 \times 10^{13} \text{ s}^{-1}$ |
|  | Dye internal conversion        | Dye-B*-cat(3)-OOH => Dye-X*-cat(3)-OOH + <i>IC X4</i>                                | $2.4 \times 10^{13} \text{ s}^{-1}$ |
|  | Dye intersystem crossing       | Dye-X*-cat(3)-OOH => Dye-TN*-cat(3)-OOH + <i>ISC4</i>                                | $4 \times 10^{13} \text{ s}^{-1}$   |
|  | Dye photoexcitation            | Dye-TN*-cat(3)-OOH => Dye-TN*-cat(3)-OOH + <i>esa-TN4</i>                            | $117 \text{ s}^{-1}$                |
|  | Dye photoexcitation            | Dye-Y*-cat(3)-OOH => Dye-Y*-cat(3)-OOH + <i>esa-Y4</i>                               | $117 \text{ s}^{-1}$                |
|  | Dye photoexcitation            | Dye-B*-cat(3)-OOH => Dye-B*-cat(3)-OOH + <i>esa-B4</i>                               | $117 \text{ s}^{-1}$                |
|  | Dye photoexcitation            | Dye-X*-cat(3)-OOH => Dye-X*-cat(3)-OOH + <i>esa-X4</i>                               | $117 \text{ s}^{-1}$                |
|  | Dye radiative relaxation       | Dye-TN*-cat(3)-OOH => Dye-cat(3)-OOH + <i>incoherentems-4</i>                        | $9.6 \times 10^4 \text{ s}^{-1}$    |
|  | Dye non-radiative relaxation   | Dye-TN*-cat(3)-OOH => Dye-cat(3)-OOH + <i>nr-ems-4</i>                               | $2.6 \times 10^6 \text{ s}^{-1}$    |
|  | Dye – substrate injection      | Dye-TN*-cat(3)-OOH => Dye+cat(3)-OOH + electron + <i>injection-TN4</i>               | $1.0 \times 10^{12} \text{ s}^{-1}$ |
|  | Dye – substrate injection      | Dye-Y*-cat(3)-OOH => Dye+cat(3)-OOH + electron + <i>injection-Y4</i>                 | $1.0 \times 10^{12} \text{ s}^{-1}$ |
|  | Dye – substrate injection      | Dye-B*-cat(3)-OOH => Dye+cat(3)-OOH + electron + <i>injection-B4</i>                 | $1.0 \times 10^{12} \text{ s}^{-1}$ |
|  | Dye – substrate injection      | Dye-X*-cat(3)-OOH => Dye+cat(3)-OOH + electron + <i>injection-X4</i>                 | $1.0 \times 10^{12} \text{ s}^{-1}$ |
|  | Dye-catalyst electron transfer | Dye+cat(3)-OOH => Dye-cat(4)-OO + H <sup>+</sup> + <i>groundstate4</i>               | $6.9 \times 10^9 \text{ s}^{-1}$    |
|  | Oxygen release                 | Dye-cat(4)-OO => Dye-cat(2)-OH <sub>2</sub> + O <sub>2</sub> + <i>watersplitting</i> | $7.5 \times 10^{-4} \text{ s}^{-1}$ |
|  | Back electron transfer         | Dye+cat(3)-OOH + electron => Dye-cat(3)-OOH + <i>BETox4</i>                          | $100 \text{ s}^{-1}$                |
|  | Back electron transfer         | Dye-cat(4)-OO + electron => Dye-cat(3)-OOH + <i>BETcat4</i>                          | $100 \text{ s}^{-1}$                |

<sup>a</sup> Rate coefficients for dye excitations calculated assuming dye-catalyst complexes are adsorbed inside a nanoparticulate TiO<sub>2</sub> matrix, including optical scattering. All optical transitions are pseudo-first order in absorbed photon flux. All dye photophysical and charge injection rate coefficients are from Ref<sup>5</sup>.

## 2. Additional figures

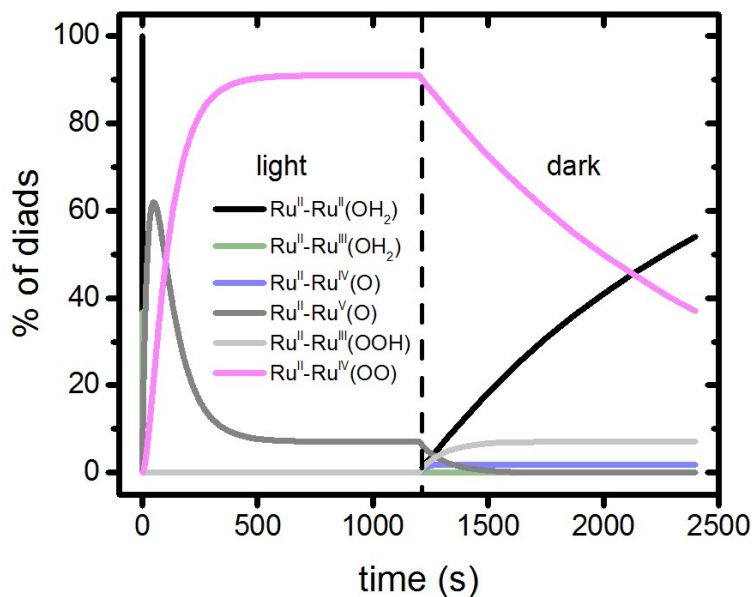

**Figure S1.** Linear y axis version of Figure 2c, main manuscript. Predictions by simulations in a 1200s light – 1200s dark sequence, diads present with dye in the Ru<sup>II</sup> state. The colors correspond to the species present in each catalytic stage, Figure 1, main manuscript.

## 3. References

1. L. Wang, D. L. Ashford, D. W. Thompson, T. J. Meyer and J. M. Papanikolas, *J Phys Chem C*, 2013, **117**, 24250-24258.
2. P. T. Xu, C. L. Gray, L. Q. Xiao and T. E. Mallouk, *J Am Chem Soc*, 2018, **140**, 11647-11654.
3. K. Hu, R. N. Sampaio, S. L. Marquard, M. K. Brennaman, Y. Tamaki, T. J. Meyer and G. J. Meyer, *Inorg Chem*, 2018, **57**, 486-494.
4. J. J. Concepcion, M. K. Tsai, J. T. Muckerman and T. J. Meyer, *J Am Chem Soc*, 2010, **132**, 1545-1557.
5. T. P. Cheshire, J. Boodry, E. A. Kober, M. K. Brennaman, P. G. Giokas, D. F. Zigler, A. M. Moran, J. M. Papanikolas, G. J. Meyer, T. J. Meyer and F. A. Houle, *J Chem Phys*, 2022 DOI: 10.1063/5.0127852.
