# Supplementary material for: Water oxidation by a dye-catalyst diad in natural sunlight: timing and coordination of excitations and reactions across timescales of picoseconds to hours
Source: Chem Sci. 2023 Jan 23;14(8):1997–2008. doi: 10.1039/d2sc06966k (PMC9945043; doi:10.1039/d2sc06966k)
Supplement: SC-014-D2SC06966K-s002 [file SC-014-D2SC06966K-s002.xlsx]

## Sheet: Fig 2a
time (s)	# electrons per diad	# protons per diad	#O2 per diad
0	0		0
0.000169938	0.00995	0	0
0.000340247	0.01992	3.32108e-09	0
0.000510859	0.02991	3.32108e-09	0
0.000681856	0.03992	1.32843e-08	0
0.000853262	0.04995	3.65319e-08	0
0.00103	0.06	5.64583e-08	0
0.0012	0.07006	7.63848e-08	0
0.00137	0.08015	1.29522e-07	0
0.00154	0.09024	1.66054e-07	0
0.00172	0.10036	1.92623e-07	0
0.00189	0.1105	2.59044e-07	0
0.00206	0.12065	3.95208e-07	0
0.00224	0.13082	5.11446e-07	0
0.00241	0.141	6.01115e-07	0
0.00259	0.15121	7.17353e-07	0
0.00277	0.16143	8.36912e-07	0
0.00294	0.17167	1.02953e-06	0
0.00312	0.18192	1.23544e-06	0
0.0033	0.19218	1.43138e-06	0
0.00348	0.20246	1.64061e-06	0
0.00366	0.21276	1.85316e-06	0
0.00384	0.22308	2.13877e-06	0
0.00402	0.2334	2.45428e-06	0
0.0042	0.24375	2.79303e-06	0
0.00438	0.25411	3.11849e-06	0
0.00456	0.26448	3.52698e-06	0
0.00475	0.27487	3.9388e-06	0
0.00493	0.28527	4.37386e-06	0
0.00511	0.29569	4.84213e-06	0
0.0053	0.30611	5.27055e-06	0
0.00548	0.31656	5.77203e-06	0
0.00567	0.32701	6.43625e-06	0
0.00586	0.33748	7.04401e-06	0
0.00605	0.34797	7.61855e-06	0
0.00624	0.35847	8.2562e-06	0
0.00643	0.36898	9.01008e-06	0
0.00662	0.3795	9.84367e-06	0
0.00681	0.39004	1.07238e-05	0
0.007	0.40058	1.16271e-05	0
0.00719	0.41115	1.26135e-05	0
0.00739	0.42172	1.35832e-05	0
0.00758	0.43231	1.45563e-05	0
0.00778	0.44291	1.57585e-05	0
0.00797	0.45353	1.6974e-05	0
0.00817	0.46415	1.82028e-05	0
0.00837	0.47478	1.94349e-05	0
0.00857	0.48543	2.07534e-05	0
0.00877	0.49609	2.20918e-05	0
0.00897	0.50676	2.34368e-05	0
0.00917	0.51745	2.49214e-05	0
0.00938	0.52814	2.63195e-05	0
0.00958	0.53885	2.799e-05	0
0.00979	0.54957	2.95974e-05	0
0.00999	0.56029	3.13941e-05	0
0.0102	0.57103	3.32938e-05	0
0.01041	0.58178	3.52333e-05	0
0.01062	0.59255	3.72525e-05	0
0.01083	0.60332	3.93282e-05	0
0.01105	0.6141	4.14437e-05	0
0.01126	0.6249	4.3546e-05	0
0.01148	0.6357	4.57279e-05	0
0.01169	0.64652	4.81058e-05	0
0.01191	0.65734	5.04837e-05	0
0.01213	0.66818	5.30675e-05	0
0.01235	0.67902	5.55384e-05	0
0.01257	0.68988	5.81853e-05	0
0.0128	0.70074	6.08255e-05	0
0.01302	0.71162	6.37016e-05	0
0.01325	0.72251	6.66374e-05	0
0.01348	0.73341	6.96297e-05	0
0.01371	0.74432	7.25921e-05	0
0.01394	0.75524	7.57604e-05	0
0.01417	0.76616	7.91612e-05	0
0.01441	0.7771	8.27347e-05	0
0.01464	0.78805	8.61189e-05	0
0.01488	0.799	8.96459e-05	0
0.01512	0.80997	9.34651e-05	0
0.01536	0.82094	9.74504e-05	0
0.01561	0.83193	0.000101612	0
0.01585	0.84292	0.000105859	0
0.0161	0.85393	0.00011016	0
0.01635	0.86494	0.0001146	0
0.0166	0.87596	0.000119017	0
0.01685	0.88699	0.000123727	0
0.01711	0.89803	0.000128675	0
0.01737	0.90909	0.000133474	0
0.01763	0.92015	0.000138701	0
0.01789	0.93121	0.000143985	0
0.01815	0.94229	0.000149349	0
0.01842	0.95337	0.000154961	0
0.01869	0.96447	0.000160843	0
0.01896	0.97557	0.000166549	0
0.01923	0.98669	0.00017243	0
0.01951	0.99781	0.000178564	0
0.01979	1.00894	0.000184891	0
0.02007	1.02008	0.00019139	0
0.02036	1.03123	0.000198159	0
0.02064	1.04239	0.00020505	0
0.02093	1.05355	0.00021218	0
0.02123	1.06472	0.000219606	0
0.02152	1.07591	0.000227112	0
0.02182	1.0871	0.000234804	0
0.02213	1.0983	0.000242874	0
0.02243	1.10951	0.000251233	0
0.02274	1.12072	0.000259841	0
0.02306	1.13195	0.000268386	0
0.02337	1.14318	0.000277489	0
0.02369	1.15443	0.000286642	0
0.02402	1.16568	0.000295981	0
0.02434	1.17694	0.000305539	0
0.02468	1.1882	0.000315838	0
0.02501	1.19948	0.000325972	0
0.02535	1.21076	0.000336839	0
0.0257	1.22205	0.00034736	0
0.02605	1.23335	0.000358638	0
0.0264	1.24466	0.000370063	0
0.02676	1.25597	0.00038165	0
0.02712	1.2673	0.000393779	0
0.02749	1.27863	0.000406367	0
0.02786	1.28997	0.000419372	0
0.02824	1.30132	0.000432823	0
0.02863	1.31268	0.000446532	0
0.02902	1.32405	0.000460667	0
0.02941	1.33542	0.000474984	0
0.02982	1.3468	0.000489696	0
0.03022	1.35819	0.0005049	0
0.03064	1.36959	0.000520785	0
0.03106	1.381	0.000537221	0
0.03149	1.39242	0.00055383	0
0.03193	1.40384	0.000571644	0
0.03237	1.41527	0.000589687	0
0.03283	1.42671	0.000608211	0
0.03329	1.43815	0.000627347	0
0.03376	1.44961	0.00064719	0
0.03424	1.46107	0.000667699	0
0.03473	1.47254	0.00068913	0
0.03522	1.48402	0.000711528	0
0.03573	1.49551	0.000734108	0
0.03625	1.507	0.000757181	0
0.03678	1.51851	0.000781372	0
0.03733	1.53002	0.00080665	0
0.03788	1.54154	0.000832166	0
0.03845	1.55307	0.000859048	0
0.03903	1.56461	0.000887148	0
0.03963	1.57616	0.000915739	0
0.04024	1.58771	0.000945474	0
0.04087	1.59927	0.000976488	0
0.04152	1.61084	0.00101	0
0.04218	1.62242	0.00104	0
0.04286	1.63401	0.00108	0
0.04357	1.64561	0.00111	0
0.04429	1.65721	0.00115	0
0.04504	1.66883	0.00119	0
0.04582	1.68045	0.00123	0
0.04662	1.69208	0.00128	0
0.04745	1.70372	0.00132	0
0.04831	1.71537	0.00137	0
0.04921	1.72703	0.00142	0
0.05015	1.7387	0.00147	0
0.05112	1.75037	0.00153	0
0.05214	1.76206	0.00159	0
0.0532	1.77376	0.00165	0
0.05433	1.78546	0.00172	0
0.05551	1.79718	0.00179	0
0.05675	1.8089	0.00186	0
0.05808	1.82063	0.00194	0
0.05948	1.83238	0.00203	0
0.06099	1.84413	0.00212	0
0.06261	1.8559	0.00223	0
0.06435	1.86768	0.00234	0
0.06626	1.87946	0.00246	0
0.06835	1.89126	0.0026	0
0.07066	1.90307	0.00275	0
0.07327	1.91489	0.00292	0
0.07624	1.92672	0.00312	0
0.0797	1.93856	0.00335	0
0.08385	1.95041	0.00364	0
0.08904	1.96227	0.00399	0
0.09599	1.97412	0.00448	0
0.10651	1.98595	0.00522	0
0.1284	1.99764	0.00678	0
0.26177	2.00755	0.01631	1.66054e-09
0.49385	2.01584	0.03288	8.30269e-09
0.72757	2.02413	0.04945	1.99265e-08
0.96244	2.03242	0.06602	3.65319e-08
1.19911	2.04071	0.08258	6.14399e-08
1.43708	2.049	0.09915	1.16238e-07
1.6766	2.05729	0.11571	1.8598e-07
1.91772	2.06557	0.13228	2.52402e-07
2.16021	2.07387	0.14884	3.63658e-07
2.4043	2.08215	0.16541	5.2307e-07
2.64994	2.09044	0.18197	7.00747e-07
2.89719	2.09873	0.19854	9.16617e-07
3.14604	2.10702	0.21511	1.19725e-06
3.39654	2.11531	0.23167	1.49282e-06
3.64855	2.1236	0.24823	1.88803e-06
3.90223	2.13189	0.2648	2.24671e-06
4.15747	2.14018	0.28137	2.71996e-06
4.4145	2.14847	0.29793	3.26628e-06
4.67317	2.15676	0.3145	3.86241e-06
4.93371	2.16505	0.33106	4.56814e-06
5.19599	2.17334	0.34762	5.35192e-06
5.45998	2.18163	0.36418	6.23864e-06
5.72569	2.18992	0.38074	7.19345e-06
5.99308	2.1982	0.39731	8.2645e-06
6.26258	2.2065	0.41387	9.43186e-06
6.53376	2.21478	0.43043	1.06656e-05
6.80707	2.22307	0.44699	1.2112e-05
7.08227	2.23137	0.46355	1.36131e-05
7.35927	2.23966	0.48012	1.53052e-05
7.63845	2.24795	0.49668	1.70521e-05
7.91928	2.25624	0.51324	1.89384e-05
8.20197	2.26453	0.52979	2.09128e-05
8.48676	2.27281	0.54635	2.3226e-05
8.77346	2.2811	0.56291	2.55092e-05
9.06248	2.28939	0.57946	2.79502e-05
9.35354	2.29768	0.59602	3.0705e-05
9.64653	2.30597	0.61258	3.36342e-05
9.94178	2.31427	0.62913	3.66381e-05
10.2393	2.32255	0.64569	3.99675e-05
10.539	2.33085	0.66224	4.34297e-05
10.8407	2.33913	0.6788	4.70497e-05
11.1448	2.34743	0.69535	5.10582e-05
11.4511	2.35572	0.7119	5.52478e-05
11.7599	2.36401	0.72846	5.96847e-05
12.0711	2.3723	0.745	6.42081e-05
12.3847	2.38059	0.76156	6.92843e-05
12.7003	2.38888	0.7781	7.47492e-05
13.0184	2.39717	0.79465	8.02621e-05
13.3388	2.40547	0.8112	8.61537e-05
13.6619	2.41376	0.82774	9.23509e-05
13.9874	2.42205	0.84429	9.88486e-05
14.3157	2.43034	0.86083	0.00010557
14.6465	2.43863	0.87737	0.000112616
14.9796	2.44692	0.89391	0.000120233
15.3158	2.45521	0.91045	0.000128154
15.6543	2.46351	0.92699	0.000136405
15.9957	2.4718	0.94352	0.000144882
16.3398	2.48009	0.96006	0.000153771
16.6866	2.48838	0.97659	0.000163419
17.0363	2.49668	0.99313	0.000173405
17.389	2.50497	1.00966	0.000183795
17.7445	2.51326	1.02619	0.000194623
18.1029	2.52155	1.04271	0.000205862
18.4642	2.52985	1.05924	0.00021776
18.8289	2.53814	1.07576	0.000230289
19.1961	2.54643	1.09229	0.000243234
19.5665	2.55473	1.10881	0.000256733
19.94	2.56302	1.12532	0.00027086
20.317	2.57132	1.14184	0.000285583
20.6973	2.57961	1.15836	0.000301049
21.0806	2.58791	1.17487	0.00031667
21.4674	2.5962	1.19138	0.00033292
21.8576	2.6045	1.20789	0.000350053
22.2511	2.61279	1.2244	0.000367949
22.6485	2.62109	1.2409	0.000386309
23.0489	2.62939	1.25741	0.000405587
23.453	2.63768	1.27391	0.00042537
23.8605	2.64598	1.2904	0.000446037
24.2717	2.65427	1.30689	0.000467726
24.6867	2.66257	1.32338	0.000490088
25.1052	2.67087	1.33988	0.000513118
25.528	2.67916	1.35636	0.000537254
25.9542	2.68746	1.37284	0.000562436
26.3843	2.69576	1.38932	0.000588488
26.8186	2.70406	1.40579	0.000615731
27.2574	2.71236	1.42227	0.000643592
27.7	2.72065	1.43873	0.000672344
28.1468	2.72895	1.4552	0.000702066
28.5978	2.73725	1.47166	0.000732753
29.0529	2.74555	1.48812	0.000764461
29.5125	2.75385	1.50458	0.000797618
29.9762	2.76215	1.52103	0.000831817
30.4445	2.77046	1.53747	0.000868131
30.9172	2.77876	1.55392	0.000904701
31.395	2.78706	1.57036	0.000942776
31.8773	2.79536	1.58679	0.00098227
32.3641	2.80367	1.60322	0.00102
32.856	2.81197	1.61964	0.00107
33.3528	2.82027	1.63606	0.00111
33.8545	2.82857	1.65247	0.00115
34.3609	2.83688	1.66888	0.0012
34.8731	2.84518	1.68529	0.00125
35.3904	2.85349	1.70169	0.0013
35.9128	2.86179	1.71808	0.00135
36.4405	2.8701	1.73447	0.0014
36.9737	2.87841	1.75085	0.00146
37.5122	2.88672	1.76723	0.00151
38.0563	2.89503	1.7836	0.00157
38.6061	2.90334	1.79996	0.00163
39.1618	2.91164	1.81632	0.00169
39.7238	2.91995	1.83267	0.00176
40.2911	2.92827	1.84902	0.00182
40.8647	2.93658	1.86535	0.00189
41.4439	2.94489	1.88169	0.00196
42.0297	2.9532	1.898	0.00203
42.6217	2.96152	1.91432	0.00211
43.2198	2.96983	1.93063	0.00219
43.8242	2.97815	1.94692	0.00227
44.436	2.98646	1.96322	0.00235
45.0544	2.99478	1.9795	0.00243
45.6793	3.0031	1.99577	0.00252
46.3116	3.01142	2.01204	0.00261
46.9502	3.01974	2.02829	0.0027
47.5962	3.02806	2.04454	0.0028
48.2495	3.03638	2.06077	0.0029
48.9099	3.04471	2.077	0.003
49.5773	3.05303	2.09321	0.0031
50.253	3.06136	2.10942	0.00321
50.9363	3.06968	2.12561	0.00332
51.6268	3.07801	2.14179	0.00344
52.325	3.08634	2.15797	0.00355
53.0314	3.09466	2.17412	0.00368
53.7467	3.103	2.19028	0.0038
54.4697	3.11133	2.20641	0.00393
55.2009	3.11966	2.22253	0.00406
55.9404	3.12799	2.23864	0.0042
56.6885	3.13633	2.25474	0.00434
57.4458	3.14466	2.27082	0.00448
58.2121	3.153	2.28689	0.00463
58.987	3.16134	2.30294	0.00478
59.7712	3.16968	2.31898	0.00494
60.5643	3.17803	2.33501	0.0051
61.3668	3.18637	2.35102	0.00526
62.1784	3.19471	2.36701	0.00544
62.9993	3.20306	2.38299	0.00561
63.8301	3.21141	2.39895	0.00579
64.6714	3.21976	2.4149	0.00598
65.5226	3.22812	2.43082	0.00617
66.3831	3.23647	2.44673	0.00636
67.2542	3.24483	2.46262	0.00657
68.136	3.25319	2.4785	0.00677
69.0277	3.26154	2.49435	0.00698
69.93	3.26991	2.51019	0.0072
70.8436	3.27827	2.526	0.00743
71.7678	3.28663	2.54179	0.00766
72.7031	3.295	2.55756	0.00789
73.6493	3.30337	2.57331	0.00814
74.6062	3.31174	2.58904	0.00839
75.5751	3.32012	2.60475	0.00864
76.5558	3.32849	2.62043	0.00891
77.5478	3.33687	2.63609	0.00918
78.5529	3.34525	2.65173	0.00946
79.5702	3.35364	2.66734	0.00974
80.5985	3.36202	2.68293	0.01003
81.6388	3.37041	2.69849	0.01033
82.6919	3.3788	2.71402	0.01064
83.7584	3.3872	2.72954	0.01096
84.8371	3.39559	2.74502	0.01128
85.9285	3.40399	2.76048	0.01161
87.0334	3.41239	2.7759	0.01195
88.1515	3.4208	2.7913	0.0123
89.2824	3.42921	2.80666	0.01266
90.4266	3.43762	2.82201	0.01302
91.584	3.44603	2.83732	0.0134
92.7563	3.45445	2.8526	0.01378
93.9401	3.46287	2.86785	0.01418
95.1397	3.47129	2.88307	0.01458
96.3516	3.47972	2.89825	0.01499
97.5792	3.48815	2.9134	0.01542
98.8208	3.49658	2.92851	0.01585
100.076	3.50502	2.9436	0.01629
101.347	3.51346	2.95865	0.01674
102.632	3.5219	2.97366	0.01721
103.932	3.53035	2.98864	0.01768
105.246	3.5388	3.00358	0.01817
106.577	3.54725	3.01848	0.01867
107.922	3.55571	3.03334	0.01918
109.282	3.56417	3.04817	0.0197
110.657	3.57264	3.06295	0.02023
112.048	3.5811	3.0777	0.02077
113.455	3.58958	3.09241	0.02133
114.877	3.59806	3.10708	0.02189
116.314	3.60654	3.1217	0.02248
117.767	3.61502	3.13629	0.02307
119.237	3.62351	3.15083	0.02367
120.723	3.63201	3.16533	0.02429
122.225	3.64051	3.17979	0.02492
123.743	3.64901	3.1942	0.02556
125.278	3.65752	3.20858	0.02622
126.829	3.66603	3.2229	0.02688
128.397	3.67454	3.23718	0.02757
129.982	3.68306	3.25142	0.02826
131.583	3.69159	3.26562	0.02897
133.201	3.70012	3.27976	0.0297
134.835	3.70865	3.29386	0.03044
136.488	3.71719	3.30791	0.03119
138.157	3.72573	3.32191	0.03195
139.842	3.73428	3.33587	0.03273
141.548	3.74283	3.34978	0.03353
143.268	3.75139	3.36364	0.03434
145.007	3.75995	3.37744	0.03516
146.762	3.76852	3.3912	0.036
148.535	3.77709	3.40491	0.03685
150.327	3.78567	3.41857	0.03772
152.135	3.79426	3.43217	0.03861
153.961	3.80284	3.44573	0.03951
155.806	3.81144	3.45923	0.04043
157.667	3.82004	3.47269	0.04136
159.547	3.82864	3.48609	0.0423
161.444	3.83725	3.49944	0.04327
163.359	3.84586	3.51273	0.04424
165.293	3.85448	3.52597	0.04524
167.244	3.86311	3.53916	0.04625
169.213	3.87174	3.5523	0.04727
171.201	3.88037	3.56538	0.04831
173.206	3.88901	3.57841	0.04937
175.23	3.89766	3.59139	0.05044
177.272	3.90631	3.60431	0.05153
179.332	3.91497	3.61718	0.05264
181.409	3.92363	3.62999	0.05376
183.505	3.93229	3.64276	0.0549
185.618	3.94096	3.65546	0.05605
187.748	3.94964	3.66812	0.05722
189.898	3.95833	3.68072	0.05841
192.066	3.96702	3.69327	0.05961
194.251	3.97571	3.70576	0.06083
196.454	3.98441	3.71819	0.06207
198.676	3.99312	3.73057	0.06332
200.915	4.00183	3.7429	0.06459
203.171	4.01055	3.75517	0.06587
205.445	4.01927	3.76738	0.06717
207.738	4.02799	3.77954	0.06849
210.047	4.03673	3.79165	0.06982
212.374	4.04546	3.80371	0.07117
214.718	4.0542	3.81571	0.07254
217.081	4.06295	3.82766	0.07392
219.461	4.0717	3.83955	0.07531
221.858	4.08046	3.8514	0.07673
224.271	4.08923	3.86319	0.07816
226.702	4.098	3.87493	0.0796
229.148	4.10677	3.88661	0.08106
231.612	4.11555	3.89825	0.08253
234.091	4.12434	3.90984	0.08403
236.586	4.13313	3.92136	0.08553
239.1	4.14192	3.93284	0.08706
241.631	4.15072	3.94427	0.08859
244.176	4.15953	3.95565	0.09014
246.735	4.16834	3.96698	0.09171
249.311	4.17715	3.97826	0.09329
251.903	4.18597	3.9895	0.09488
254.51	4.19479	4.00069	0.09649
257.132	4.20362	4.01183	0.09811
259.772	4.21245	4.02293	0.09975
262.427	4.22129	4.03397	0.1014
265.094	4.23013	4.04497	0.10306
267.778	4.23898	4.05594	0.10474
270.475	4.24783	4.06685	0.10643
273.185	4.25668	4.07771	0.10814
275.911	4.26554	4.08854	0.10985
278.647	4.27441	4.09932	0.11158
281.399	4.28328	4.11006	0.11333
284.165	4.29215	4.12076	0.11508
286.942	4.30102	4.13142	0.11685
289.735	4.3099	4.14203	0.11863
292.54	4.31879	4.15262	0.12042
295.354	4.32768	4.16316	0.12222
298.182	4.33657	4.17366	0.12403
301.021	4.34546	4.18413	0.12586
303.875	4.35436	4.19456	0.12769
306.74	4.36327	4.20495	0.12954
309.615	4.37218	4.21531	0.1314
312.5	4.38109	4.22562	0.13327
315.398	4.39	4.23591	0.13515
318.309	4.39892	4.24617	0.13704
321.229	4.40784	4.25639	0.13894
324.16	4.41677	4.26657	0.14085
327.1	4.42569	4.27672	0.14276
330.048	4.43462	4.28685	0.14469
333.01	4.44355	4.29695	0.14662
335.98	4.45249	4.30702	0.14857
338.959	4.46143	4.31706	0.15052
341.948	4.47037	4.32707	0.15248
344.944	4.47931	4.33706	0.15445
347.952	4.48826	4.34701	0.15643
350.968	4.49721	4.35693	0.15842
353.99	4.50616	4.36682	0.16041
357.019	4.51512	4.3767	0.16242
360.059	4.52407	4.38655	0.16442
363.107	4.53303	4.39639	0.16644
366.16	4.54199	4.40619	0.16846
369.22	4.55096	4.41598	0.17049
372.287	4.55992	4.42574	0.17252
375.361	4.56889	4.43547	0.17457
378.443	4.57787	4.44519	0.17662
381.533	4.58684	4.45489	0.17867
384.627	4.59581	4.46456	0.18074
387.728	4.60479	4.47422	0.1828
390.835	4.61377	4.48386	0.18487
393.949	4.62275	4.49349	0.18695
397.068	4.63173	4.50309	0.18903
400.194	4.64071	4.51268	0.19112
403.323	4.6497	4.52224	0.19322
406.458	4.65869	4.5318	0.19532
409.598	4.66768	4.54133	0.19742
412.742	4.67667	4.55086	0.19953
415.891	4.68566	4.56036	0.20164
419.044	4.69465	4.56984	0.20376
422.207	4.70365	4.57933	0.20588
425.373	4.71264	4.58879	0.208
428.544	4.72164	4.59825	0.21013
431.715	4.73064	4.60767	0.21227
434.889	4.73964	4.61709	0.2144
438.068	4.74864	4.6265	0.21655
441.256	4.75764	4.6359	0.21869
444.448	4.76665	4.64528	0.22084
447.638	4.77565	4.65466	0.22299
450.832	4.78466	4.66402	0.22515
454.029	4.79367	4.67338	0.22731
457.234	4.80268	4.68272	0.22947
460.439	4.81168	4.69205	0.23163
463.649	4.8207	4.70138	0.2338
466.862	4.82971	4.71069	0.23597
470.077	4.83872	4.71999	0.23814
473.297	4.84773	4.72929	0.24032
476.516	4.85675	4.73857	0.2425
479.742	4.86576	4.74786	0.24468
482.968	4.87478	4.75713	0.24686
486.196	4.88379	4.76639	0.24904
489.429	4.89281	4.77565	0.25123
492.661	4.90183	4.78491	0.25342
495.897	4.91084	4.79416	0.25561
499.132	4.91986	4.80339	0.2578
502.374	4.92888	4.81262	0.25999
505.616	4.9379	4.82184	0.26219
508.86	4.94692	4.83105	0.26439
512.105	4.95594	4.84025	0.2666
515.353	4.96497	4.84947	0.2688
518.602	4.97399	4.85866	0.271
521.854	4.98301	4.86785	0.27321
525.104	4.99203	4.87703	0.27542
528.361	5.00106	4.88622	0.27763
531.617	5.01008	4.89539	0.27984
534.87	5.01911	4.90456	0.28205
538.131	5.02813	4.91374	0.28426
541.39	5.03716	4.9229	0.28648
544.652	5.04618	4.93206	0.2887
547.916	5.05521	4.94122	0.29091
551.18	5.06424	4.95037	0.29313
554.445	5.07327	4.95951	0.29535
557.711	5.08229	4.96867	0.29757
560.98	5.09132	4.9778	0.29979
564.251	5.10035	4.98694	0.30201
567.523	5.10938	4.99607	0.30424
570.796	5.1184	5.0052	0.30646
574.067	5.12743	5.01432	0.30869
577.339	5.13646	5.02344	0.31092
580.612	5.14549	5.03256	0.31315
583.889	5.15452	5.04168	0.31537
587.165	5.16355	5.05079	0.3176
590.444	5.17258	5.0599	0.31983
593.724	5.18161	5.06901	0.32207
597.006	5.19064	5.07813	0.32429
600.284	5.19968	5.08722	0.32653
603.565	5.20871	5.09634	0.32876
606.844	5.21774	5.10543	0.331
610.124	5.22677	5.11452	0.33323
613.406	5.23581	5.12362	0.33546
616.691	5.24484	5.13272	0.3377
619.977	5.25387	5.14181	0.33994
623.261	5.26291	5.1509	0.34218
626.546	5.27194	5.15999	0.34441
629.831	5.28097	5.16906	0.34665
633.117	5.29001	5.17814	0.34889
636.403	5.29904	5.18723	0.35113
639.692	5.30807	5.19631	0.35337
642.978	5.31711	5.20539	0.35561
646.265	5.32614	5.21446	0.35785
649.553	5.33517	5.22355	0.36009
652.844	5.34421	5.23262	0.36233
656.137	5.35324	5.2417	0.36457
659.426	5.36228	5.25077	0.36681
662.714	5.37131	5.25984	0.36906
666.004	5.38034	5.26891	0.3713
669.294	5.38938	5.27798	0.37354
672.584	5.39841	5.28704	0.37578
675.874	5.40745	5.29611	0.37803
679.163	5.41649	5.30517	0.38027
682.455	5.42553	5.31424	0.38252
685.748	5.43456	5.3233	0.38477
689.038	5.44359	5.33236	0.38701
692.331	5.45263	5.34143	0.38925
695.625	5.46166	5.35049	0.3915
698.922	5.4707	5.35956	0.39374
702.215	5.47974	5.36861	0.39599
705.51	5.48877	5.37766	0.39824
708.804	5.49781	5.38672	0.40048
712.094	5.50684	5.39578	0.40273
715.39	5.51588	5.40484	0.40498
718.684	5.52492	5.41389	0.40722
721.98	5.53395	5.42295	0.40947
725.276	5.54299	5.432	0.41172
728.572	5.55203	5.44105	0.41397
731.868	5.56107	5.45011	0.41622
735.162	5.5701	5.45916	0.41846
738.455	5.57914	5.46821	0.42071
741.755	5.58818	5.47726	0.42296
745.049	5.59721	5.4863	0.42521
748.345	5.60625	5.49535	0.42746
751.638	5.61529	5.50441	0.42971
754.932	5.62433	5.51345	0.43196
758.229	5.63336	5.52252	0.4342
761.527	5.6424	5.53156	0.43645
764.822	5.65144	5.54061	0.4387
768.121	5.66048	5.54966	0.44095
771.418	5.66951	5.55871	0.4432
774.719	5.67855	5.56776	0.44545
778.017	5.68759	5.5768	0.4477
781.314	5.69663	5.58585	0.44995
784.612	5.70567	5.59489	0.4522
787.911	5.7147	5.60394	0.45445
791.207	5.72374	5.61299	0.4567
794.505	5.73278	5.62204	0.45895
797.802	5.74181	5.63108	0.4612
801.098	5.75085	5.64012	0.46345
804.396	5.75989	5.64917	0.4657
807.697	5.76893	5.65822	0.46795
810.995	5.77796	5.66726	0.4702
814.296	5.787	5.6763	0.47246
817.593	5.79604	5.68533	0.47471
820.891	5.80508	5.69437	0.47696
824.187	5.81412	5.7034	0.47922
827.487	5.82316	5.71245	0.48147
830.784	5.83219	5.72149	0.48372
834.081	5.84123	5.73054	0.48597
837.382	5.85027	5.73958	0.48822
840.68	5.85931	5.74862	0.49047
843.979	5.86835	5.75766	0.49272
847.278	5.87738	5.7667	0.49497
850.575	5.88642	5.77574	0.49723
853.874	5.89546	5.78477	0.49948
857.174	5.9045	5.79381	0.50173
860.476	5.91354	5.80285	0.50398
863.774	5.92258	5.8119	0.50623
867.072	5.93161	5.82094	0.50849
870.373	5.94065	5.82998	0.51074
873.674	5.94969	5.83903	0.51299
876.975	5.95873	5.84808	0.51524
880.278	5.96776	5.85713	0.51749
883.58	5.9768	5.86617	0.51974
886.88	5.98584	5.8752	0.52199
890.179	5.99488	5.88423	0.52424
893.48	6.00392	5.89328	0.5265
896.777	6.01295	5.90231	0.52875
900.078	6.02199	5.91135	0.531
903.379	6.03104	5.92038	0.53326
906.678	6.04007	5.92943	0.53551
909.977	6.04911	5.93846	0.53776
913.278	6.05815	5.94751	0.54001
916.576	6.06719	5.95654	0.54227
919.876	6.07623	5.96558	0.54452
923.177	6.08527	5.97462	0.54677
926.478	6.09431	5.98366	0.54902
929.777	6.10334	5.99268	0.55128
933.077	6.11238	6.00172	0.55353
936.376	6.12142	6.01076	0.55578
939.678	6.13046	6.0198	0.55803
942.977	6.13949	6.02884	0.56029
946.278	6.14853	6.03788	0.56254
949.578	6.15757	6.04693	0.56479
952.879	6.16661	6.05596	0.56704
956.183	6.17564	6.065	0.56929
959.48	6.18468	6.07404	0.57154
962.781	6.19372	6.08308	0.5738
966.083	6.20276	6.09212	0.57605
969.384	6.2118	6.10115	0.5783
972.688	6.22084	6.11019	0.58055
975.989	6.22988	6.11923	0.58281
979.286	6.23892	6.12826	0.58506
982.588	6.24795	6.1373	0.58731
985.888	6.25699	6.14633	0.58957
989.191	6.26603	6.15538	0.59182
992.493	6.27506	6.16442	0.59407
995.795	6.2841	6.17346	0.59632
999.097	6.29314	6.1825	0.59857
1002.4	6.30218	6.19153	0.60082
1005.7	6.31122	6.20057	0.60308
1009	6.32025	6.20961	0.60533
1012.3	6.32929	6.21865	0.60758
1015.6	6.33833	6.22768	0.60983
1018.9	6.34737	6.23672	0.61209
1022.21	6.35641	6.24575	0.61434
1025.51	6.36545	6.25479	0.6166
1028.81	6.37449	6.26382	0.61885
1032.12	6.38353	6.27287	0.6211
1035.42	6.39257	6.2819	0.62336
1038.72	6.4016	6.29093	0.62561
1042.02	6.41064	6.29997	0.62786
1045.32	6.41969	6.30899	0.63012
1048.62	6.42872	6.31804	0.63237
1051.92	6.43776	6.32707	0.63462
1055.23	6.4468	6.33611	0.63688
1058.52	6.45584	6.34515	0.63913
1061.83	6.46488	6.35419	0.64138
1065.13	6.47392	6.36322	0.64364
1068.43	6.48296	6.37226	0.64589
1071.73	6.492	6.3813	0.64814
1075.03	6.50103	6.39033	0.65039
1078.33	6.51007	6.39936	0.65265
1081.63	6.51911	6.40841	0.6549
1084.93	6.52815	6.41745	0.65715
1088.24	6.53719	6.42648	0.65941
1091.54	6.54623	6.43552	0.66166
1094.84	6.55527	6.44456	0.66391
1098.14	6.5643	6.45359	0.66616
1101.45	6.57334	6.46264	0.66841
1104.74	6.58238	6.47167	0.67067
1108.04	6.59142	6.4807	0.67292
1111.34	6.60046	6.48973	0.67518
1114.65	6.6095	6.49877	0.67743
1117.95	6.61854	6.50781	0.67968
1121.25	6.62757	6.51685	0.68194
1124.54	6.63661	6.52588	0.68419
1127.84	6.64565	6.53491	0.68644
1131.14	6.65469	6.54395	0.6887
1134.44	6.66373	6.55299	0.69095
1137.74	6.67277	6.56203	0.6932
1141.04	6.68181	6.57107	0.69545
1144.34	6.69085	6.5801	0.69771
1147.65	6.69989	6.58914	0.69996
1150.94	6.70892	6.59817	0.70221
1154.24	6.71796	6.60721	0.70447
1157.54	6.727	6.61624	0.70672
1160.84	6.73604	6.62528	0.70897
1164.14	6.74508	6.63432	0.71123
1167.45	6.75412	6.64335	0.71348
1170.75	6.76316	6.65239	0.71573
1174.05	6.77219	6.66143	0.71799
1177.35	6.78123	6.67047	0.72024
1180.65	6.79027	6.6795	0.72249
1183.95	6.79931	6.68854	0.72474
1187.25	6.80835	6.69757	0.727
1190.55	6.81738	6.70661	0.72925
1193.85	6.82642	6.71564	0.7315
1197.15	6.83546	6.72469	0.73375
1200	6.84325	6.73248	0.73569
1200	6.84325	6.73248	0.73569
1229.48	6.84325	6.77479	0.75559
1270.83	6.84325	6.8025	0.78277
1324.52	6.84325	6.81954	0.81681
1389.8	6.84325	6.82995	0.85642
1465.99	6.84325	6.83595	0.90025
1552.26	6.84325	6.83907	0.94695
1647.92	6.84325	6.84052	0.99531
1752.83	6.84325	6.84113	1.04452
1867.62	6.84325	6.84137	1.0941
1993.67	6.84325	6.84145	1.14383
2133.04	6.84325	6.84147	1.19362
2288.7	6.84325	6.84148	1.24343
2400	6.84325	6.84148	1.27563

## Sheet: Fig 2b
time s	electron/ diad-s	H+/diad-s	O2/diad-s
0	0	0	0
0.000169938	0	0	0
0.000340247	58.5411	1.95003e-05	0
0.000510859	58.5665	0	0
0.000681856	58.5407	5.82655e-05	0
0.000853262	58.4966	0.000135628	0
0.00103	58.4874	0.000116012	0
0.0012	58.458	0.000115721	0
0.00137	58.3995	0.000307762	0
0.00154	58.3575	0.000211088	0
0.00172	58.317	0.000153145	0
0.00189	58.295	0.000382006	0
0.00206	58.2333	0.000781033	0
0.00224	58.1745	0.000664996	0
0.00241	58.066	0.000511204	0
0.00259	58.0149	0.000660834	0
0.00277	57.9194	0.000677545	0
0.00294	57.8234	0.00109	0
0.00312	57.7506	0.00116	0
0.0033	57.6884	0.0011	0
0.00348	57.5748	0.00117	0
0.00366	57.4791	0.00119	0
0.00384	57.3807	0.00159	0
0.00402	57.2353	0.00175	0
0.0042	57.1678	0.00187	0
0.00438	57.0337	0.00179	0
0.00456	56.8549	0.00224	0
0.00475	56.7577	0.00225	0
0.00493	56.6319	0.00237	0
0.00511	56.5049	0.00254	0
0.0053	56.3128	0.00231	0
0.00548	56.2057	0.0027	0
0.00567	56.091	0.00356	0
0.00586	55.8641	0.00324	0
0.00605	55.7532	0.00306	0
0.00624	55.5668	0.00338	0
0.00643	55.4463	0.00398	0
0.00662	55.2485	0.00438	0
0.00681	55.0962	0.0046	0
0.007	54.9404	0.00471	0
0.00719	54.7621	0.00511	0
0.00739	54.5448	0.005	0
0.00758	54.3547	0.005	0
0.00778	54.1913	0.00614	0
0.00797	53.9717	0.00618	0
0.00817	53.7589	0.00622	0
0.00837	53.5788	0.00621	0
0.00857	53.3952	0.00661	0
0.00877	53.195	0.00668	0
0.00897	52.9554	0.00667	0
0.00917	52.7279	0.00733	0
0.00938	52.5273	0.00687	0
0.00958	52.2974	0.00816	0
0.00979	52.0377	0.0078	0
0.00999	51.8399	0.00868	0
0.0102	51.6174	0.00913	0
0.01041	51.3707	0.00927	0
0.01062	51.1425	0.00959	0
0.01083	50.8776	0.0098	0
0.01105	50.6499	0.00994	0
0.01126	50.3698	0.00981	0
0.01148	50.1425	0.01012	0
0.01169	49.9309	0.01098	0
0.01191	49.608	0.0109	0
0.01213	49.3952	0.01178	0
0.01235	49.0859	0.01118	0
0.01257	48.8219	0.0119	0
0.0128	48.5575	0.0118	0
0.01302	48.2989	0.01277	0
0.01325	48.0514	0.01295	0
0.01348	47.7376	0.01311	0
0.01371	47.4727	0.01289	0
0.01394	47.1906	0.0137	0
0.01417	46.8993	0.0146	0
0.01441	46.5643	0.01521	0
0.01464	46.3256	0.01432	0
0.01488	45.9959	0.01481	0
0.01512	45.7118	0.01592	0
0.01536	45.4164	0.01649	0
0.01561	45.1087	0.01709	0
0.01585	44.8027	0.01731	0
0.0161	44.4801	0.01738	0
0.01635	44.1777	0.01781	0
0.0166	43.8556	0.01758	0
0.01685	43.5329	0.01859	0
0.01711	43.2118	0.01936	0
0.01737	42.9123	0.01863	0
0.01763	42.5745	0.02012	0
0.01789	42.2351	0.02016	0
0.01815	41.931	0.0203	0
0.01842	41.5414	0.02104	0
0.01869	41.234	0.02186	0
0.01896	40.8593	0.021	0
0.01923	40.5684	0.02147	0
0.01951	40.2189	0.02218	0
0.01979	39.8494	0.02265	0
0.02007	39.516	0.02306	0
0.02036	39.1558	0.02377	0
0.02064	38.7899	0.02396	0
0.02093	38.4481	0.02456	0
0.02123	38.0706	0.0253	0
0.02152	37.6981	0.02531	0
0.02182	37.3663	0.02568	0
0.02213	36.9793	0.02665	0
0.02243	36.617	0.02731	0
0.02274	36.247	0.02782	0
0.02306	35.8737	0.0273	0
0.02337	35.4778	0.02875	0
0.02369	35.0969	0.02858	0
0.02402	34.7203	0.02882	0
0.02434	34.3422	0.02915	0
0.02468	33.9628	0.03105	0
0.02501	33.5513	0.03016	0
0.02535	33.1615	0.03194	0
0.0257	32.7909	0.03055	0
0.02605	32.3792	0.03232	0
0.0264	31.9879	0.03232	0
0.02676	31.5882	0.03234	0
0.02712	31.1769	0.03339	0
0.02749	30.748	0.03416	0
0.02786	30.354	0.03481	0
0.02824	29.9281	0.03547	0
0.02863	29.5273	0.03564	0
0.02902	29.1219	0.03621	0
0.02941	28.6915	0.03612	0
0.02982	28.2841	0.03656	0
0.03022	27.8444	0.03716	0
0.03064	27.4358	0.03823	0
0.03106	27.0106	0.03891	0
0.03149	26.5669	0.03866	0
0.03193	26.123	0.04074	0
0.03237	25.6978	0.04056	0
0.03283	25.2391	0.04087	0
0.03329	24.8203	0.04149	0
0.03376	24.3697	0.04222	0
0.03424	23.9404	0.04283	0
0.03473	23.4806	0.04387	0
0.03522	23.0162	0.04491	0
0.03573	22.5836	0.04438	0
0.03625	22.1323	0.04442	0
0.03678	21.6593	0.04555	0
0.03733	21.2156	0.04658	0
0.03788	20.7463	0.04594	0
0.03845	20.2721	0.04726	0
0.03903	19.8077	0.04825	0
0.03963	19.3514	0.04792	0
0.04024	18.8671	0.04856	0
0.04087	18.3975	0.04935	0
0.04152	17.919	0.05007	0
0.04218	17.4436	0.05018	0
0.04286	16.955	0.05218	0
0.04357	16.4689	0.05155	0
0.04429	15.9772	0.05155	0
0.04504	15.4877	0.05326	0
0.04582	15	0.05293	0
0.04662	14.5066	0.0544	0
0.04745	14.0013	0.0545	0
0.04831	13.5106	0.05503	0
0.04921	12.9988	0.05547	0
0.05015	12.4913	0.0566	0
0.05112	11.9877	0.05741	0
0.05214	11.4742	0.05802	0
0.0532	10.9636	0.05862	0
0.05433	10.4416	0.06049	0
0.05551	9.92637	0.05961	0
0.05675	9.40083	0.06098	0
0.05808	8.87112	0.06111	0
0.05948	8.35114	0.06122	0
0.06099	7.80836	0.06218	0
0.06261	7.27353	0.06297	0
0.06435	6.73256	0.06382	0
0.06626	6.19376	0.0642	0
0.06835	5.64447	0.06495	0
0.07066	5.09696	0.0658	0
0.07327	4.54245	0.06613	0
0.07624	3.98474	0.06681	0
0.0797	3.4208	0.0673	0
0.08385	2.85404	0.06875	0
0.08904	2.28222	0.06834	0
0.09599	1.70639	0.06968	0
0.10651	1.1245	0.07045	0
0.1284	0.5337	0.07125	0
0.26177	0.07431	0.07151	1.24509e-08
0.49385	0.03573	0.07139	2.86205e-08
0.72757	0.03548	0.0709	4.9734e-08
0.96244	0.03529	0.07053	7.06991e-08
1.19911	0.03502	0.06998	1.05245e-07
1.43708	0.03483	0.06961	2.3027e-07
1.6766	0.03461	0.06917	2.91179e-07
1.91772	0.03438	0.06871	2.75467e-07
2.16021	0.03419	0.06829	4.58812e-07
2.4043	0.03396	0.06788	6.53088e-07
2.64994	0.03375	0.06743	7.23338e-07
2.89719	0.03352	0.06699	8.73064e-07
3.14604	0.03331	0.06658	1.12772e-06
3.39654	0.03309	0.06612	1.17995e-06
3.64855	0.03289	0.06573	1.56822e-06
3.90223	0.03268	0.06531	1.4139e-06
4.15747	0.03248	0.0649	1.85415e-06
4.4145	0.03225	0.06445	2.12554e-06
4.67317	0.03205	0.06404	2.30461e-06
4.93371	0.03182	0.06357	2.70873e-06
5.19599	0.0316	0.06315	2.98827e-06
5.45998	0.03141	0.06273	3.3589e-06
5.72569	0.03119	0.06234	3.59349e-06
5.99308	0.031	0.06194	4.0055e-06
6.26258	0.03076	0.06146	4.33154e-06
6.53376	0.03057	0.06107	4.5497e-06
6.80707	0.03033	0.06059	5.29194e-06
7.08227	0.03013	0.0602	5.45464e-06
7.35927	0.02993	0.0598	6.1087e-06
7.63845	0.0297	0.05931	6.25709e-06
7.91928	0.02952	0.05897	6.71716e-06
8.20197	0.02933	0.05857	6.98439e-06
8.48676	0.02911	0.05814	8.12214e-06
8.77346	0.02891	0.05774	7.9639e-06
9.06248	0.02868	0.05729	8.44572e-06
9.35354	0.02848	0.05688	9.46493e-06
9.64653	0.0283	0.05652	9.99751e-06
9.94178	0.02808	0.05608	1.01743e-05
10.2393	0.02787	0.05564	1.11922e-05
10.539	0.02766	0.05523	1.15508e-05
10.8407	0.02747	0.05487	1.19979e-05
11.1448	0.02727	0.05444	1.31833e-05
11.4511	0.02706	0.05402	1.36748e-05
11.7599	0.02686	0.05362	1.43695e-05
12.0711	0.02664	0.05318	1.45362e-05
12.3847	0.02644	0.05278	1.61871e-05
12.7003	0.02627	0.05243	1.73159e-05
13.0184	0.02607	0.05202	1.7331e-05
13.3388	0.02588	0.05164	1.83874e-05
13.6619	0.02566	0.05121	1.91805e-05
13.9874	0.02547	0.05081	1.996e-05
14.3157	0.02526	0.0504	2.04777e-05
14.6465	0.02506	0.05	2.13001e-05
14.9796	0.02489	0.04965	2.28633e-05
15.3158	0.02466	0.04919	2.35603e-05
15.6543	0.0245	0.04886	2.43781e-05
15.9957	0.02429	0.04844	2.48302e-05
16.3398	0.0241	0.04805	2.58313e-05
16.6866	0.02391	0.04767	2.78195e-05
17.0363	0.02371	0.04728	2.85582e-05
17.389	0.02351	0.04687	2.94584e-05
17.7445	0.02332	0.0465	3.04558e-05
18.1029	0.02314	0.04612	3.13602e-05
18.4642	0.02295	0.04574	3.29297e-05
18.8289	0.02274	0.04531	3.4357e-05
19.1961	0.02258	0.04498	3.52501e-05
19.5665	0.02239	0.04461	3.6443e-05
19.94	0.0222	0.04422	3.7822e-05
20.317	0.02201	0.04382	3.90536e-05
20.6973	0.02181	0.04344	4.06745e-05
21.0806	0.02164	0.04307	4.07449e-05
21.4674	0.02145	0.04269	4.20144e-05
21.8576	0.02126	0.04231	4.39149e-05
22.2511	0.02108	0.04194	4.54681e-05
22.6485	0.02088	0.04154	4.62115e-05
23.0489	0.02072	0.04121	4.81397e-05
23.453	0.02053	0.04084	4.89624e-05
23.8605	0.02036	0.04048	5.07149e-05
24.2717	0.02017	0.04011	5.2745e-05
24.6867	0.01999	0.03974	5.38844e-05
25.1052	0.01983	0.03941	5.50329e-05
25.528	0.01962	0.03899	5.70857e-05
25.9542	0.01947	0.03867	5.90824e-05
26.3843	0.01929	0.03831	6.05655e-05
26.8186	0.0191	0.03793	6.2726e-05
27.2574	0.01891	0.03754	6.35017e-05
27.7	0.01875	0.0372	6.49538e-05
28.1468	0.01858	0.03685	6.65244e-05
28.5978	0.0184	0.0365	6.80401e-05
29.0529	0.01824	0.03617	6.96778e-05
29.5125	0.01806	0.0358	7.21448e-05
29.9762	0.0179	0.03548	7.37544e-05
30.4445	0.01773	0.03511	7.75413e-05
30.9172	0.01756	0.03479	7.73559e-05
31.395	0.01738	0.03442	7.96908e-05
31.8773	0.01722	0.03408	8.18974e-05
32.3641	0.01705	0.03374	8.40494e-05
32.856	0.01688	0.03339	8.5596e-05
33.3528	0.01671	0.03304	8.77157e-05
33.8545	0.01655	0.03271	8.93548e-05
34.3609	0.0164	0.0324	9.22883e-05
34.8731	0.01621	0.03203	9.34267e-05
35.3904	0.01606	0.0317	9.56045e-05
35.9128	0.0159	0.03138	9.84541e-05
36.4405	0.01574	0.03105	9.9626e-05
36.9737	0.01558	0.03073	0.000102852
37.5122	0.01543	0.03041	0.000105427
38.0563	0.01527	0.03009	0.000106902
38.6061	0.01511	0.02976	0.000110051
39.1618	0.01495	0.02943	0.000111341
39.7238	0.01479	0.0291	0.000112507
40.2911	0.01465	0.02882	0.000116028
40.8647	0.01449	0.02848	0.000119469
41.4439	0.01435	0.0282	0.000121524
42.0297	0.01419	0.02786	0.00012339
42.6217	0.01404	0.02756	0.000126493
43.2198	0.0139	0.02726	0.000128629
43.8242	0.01376	0.02697	0.000131735
44.436	0.01359	0.02663	0.000134441
45.0544	0.01345	0.02633	0.000137489
45.6793	0.01331	0.02604	0.000140022
46.3116	0.01316	0.02572	0.000142179
46.9502	0.01303	0.02545	0.000144947
47.5962	0.01288	0.02515	0.000147957
48.2495	0.01274	0.02485	0.000151126
48.9099	0.0126	0.02457	0.00015344
49.5773	0.01247	0.02429	0.000157343
50.253	0.01232	0.02398	0.000160213
50.9363	0.01218	0.02369	0.000162243
51.6268	0.01206	0.02344	0.000164413
52.325	0.01193	0.02316	0.000168572
53.0314	0.01179	0.02287	0.000171579
53.7467	0.01165	0.02259	0.000173377
54.4697	0.01153	0.02232	0.000177961
55.2009	0.01139	0.02204	0.000181586
55.9404	0.01127	0.02179	0.000182846
56.6885	0.01114	0.02151	0.000187191
57.4458	0.01101	0.02124	0.000189382
58.2121	0.01088	0.02097	0.000193188
58.987	0.01076	0.02072	0.000197013
59.7712	0.01064	0.02046	0.000200144
60.5643	0.01052	0.0202	0.000203883
61.3668	0.0104	0.01996	0.000205796
62.1784	0.01028	0.0197	0.000211159
62.9993	0.01017	0.01946	0.000214482
63.8301	0.01005	0.01921	0.000216939
64.6714	0.00993	0.01896	0.000220267
65.5226	0.00981	0.01871	0.00022416
66.3831	0.00971	0.01849	0.000228635
67.2542	0.00959	0.01824	0.000231243
68.136	0.00948	0.01801	0.000233187
69.0277	0.00937	0.01777	0.000239193
69.93	0.00927	0.01755	0.000241077
70.8436	0.00916	0.01731	0.000245212
71.7678	0.00905	0.01708	0.000250089
72.7031	0.00895	0.01686	0.000253632
73.6493	0.00885	0.01665	0.00025741
74.6062	0.00875	0.01643	0.000261129
75.5751	0.00865	0.01621	0.000264525
76.5558	0.00854	0.01599	0.000269028
77.5478	0.00844	0.01578	0.000272141
78.5529	0.00834	0.01556	0.000276534
79.5702	0.00824	0.01535	0.00027848
80.5985	0.00815	0.01516	0.000284052
81.6388	0.00807	0.01496	0.000289704
82.6919	0.00797	0.01475	0.00029282
83.7584	0.00787	0.01455	0.000295033
84.8371	0.00778	0.01435	0.000300043
85.9285	0.00769	0.01416	0.000302702
87.0334	0.0076	0.01396	0.00030786
88.1515	0.00752	0.01377	0.000311758
89.2824	0.00744	0.01358	0.000317744
90.4266	0.00735	0.01341	0.000319325
91.584	0.00727	0.01323	0.000323748
92.7563	0.00718	0.01304	0.000327625
93.9401	0.00711	0.01288	0.000332805
95.1397	0.00702	0.01269	0.000335771
96.3516	0.00695	0.01253	0.000340837
97.5792	0.00687	0.01234	0.000344966
98.8208	0.00679	0.01218	0.000349521
100.076	0.00672	0.01202	0.000352109
101.347	0.00664	0.01184	0.000356608
102.632	0.00657	0.01168	0.000361134
103.932	0.0065	0.01152	0.000365394
105.246	0.00643	0.01136	0.000369451
106.577	0.00636	0.0112	0.000374265
107.922	0.00629	0.01105	0.000377946
109.282	0.00622	0.0109	0.000382575
110.657	0.00616	0.01075	0.000386623
112.048	0.00609	0.0106	0.000390681
113.455	0.00602	0.01045	0.000395323
114.877	0.00596	0.01032	0.000399059
116.314	0.0059	0.01017	0.000404074
117.767	0.00584	0.01004	0.000406352
119.237	0.00578	0.00989	0.000411083
120.723	0.00572	0.00976	0.000415425
122.225	0.00566	0.00962	0.000419273
123.743	0.0056	0.0095	0.000423697
125.278	0.00554	0.00936	0.000427912
126.829	0.00549	0.00924	0.000430808
128.397	0.00543	0.0091	0.000435876
129.982	0.00537	0.00898	0.000438275
131.583	0.00533	0.00887	0.000443406
133.201	0.00527	0.00874	0.00044815
134.835	0.00522	0.00863	0.000451079
136.488	0.00517	0.0085	0.000454781
138.157	0.00512	0.00839	0.000459464
139.842	0.00507	0.00829	0.000462451
141.548	0.00501	0.00815	0.000465294
143.268	0.00497	0.00805	0.000470385
145.007	0.00493	0.00794	0.00047446
146.762	0.00488	0.00784	0.000478367
148.535	0.00484	0.00773	0.000481521
150.327	0.00479	0.00762	0.000484992
152.135	0.00475	0.00753	0.000490452
153.961	0.0047	0.00742	0.000492659
155.806	0.00466	0.00732	0.000497095
157.667	0.00462	0.00723	0.000499814
159.547	0.00458	0.00713	0.000503572
161.444	0.00454	0.00704	0.000507005
163.359	0.0045	0.00694	0.000510812
165.293	0.00446	0.00685	0.000514615
167.244	0.00442	0.00676	0.000517494
169.213	0.00438	0.00667	0.000519859
171.201	0.00434	0.00658	0.000524059
173.206	0.00431	0.0065	0.000527224
175.23	0.00427	0.00641	0.000530048
177.272	0.00424	0.00633	0.000533442
179.332	0.0042	0.00624	0.00053701
181.409	0.00417	0.00617	0.000539974
183.505	0.00413	0.00609	0.000542292
185.618	0.0041	0.00601	0.000546316
187.748	0.00407	0.00594	0.000548669
189.898	0.00404	0.00586	0.000551749
192.066	0.00401	0.00579	0.000555332
194.251	0.00398	0.00572	0.000557465
196.454	0.00395	0.00564	0.000561169
198.676	0.00392	0.00557	0.000563644
200.915	0.00389	0.00551	0.000565994
203.171	0.00386	0.00544	0.000570731
205.445	0.00384	0.00537	0.000572552
207.738	0.00381	0.00531	0.000574376
210.047	0.00378	0.00524	0.000577269
212.374	0.00375	0.00518	0.000578736
214.718	0.00373	0.00512	0.000582923
217.081	0.0037	0.00506	0.000583586
219.461	0.00368	0.005	0.000587246
221.858	0.00365	0.00494	0.000589301
224.271	0.00363	0.00489	0.000592084
226.702	0.00361	0.00483	0.00059447
229.148	0.00359	0.00478	0.000597209
231.612	0.00356	0.00473	0.000598044
234.091	0.00354	0.00467	0.000601218
236.586	0.00352	0.00462	0.00060386
239.1	0.0035	0.00457	0.000605882
241.631	0.00348	0.00452	0.000606608
244.176	0.00346	0.00447	0.000609579
246.735	0.00344	0.00443	0.000612101
249.311	0.00342	0.00438	0.000613549
251.903	0.0034	0.00434	0.000614795
254.51	0.00338	0.00429	0.000616822
257.132	0.00337	0.00425	0.000618539
259.772	0.00334	0.0042	0.000618933
262.427	0.00333	0.00416	0.000622299
265.094	0.00332	0.00412	0.000624379
267.778	0.0033	0.00409	0.000624402
270.475	0.00328	0.00405	0.000626977
273.185	0.00327	0.00401	0.000629652
275.911	0.00325	0.00397	0.000629426
278.647	0.00324	0.00394	0.000632983
281.399	0.00322	0.0039	0.000633251
284.165	0.00321	0.00387	0.000634263
286.942	0.0032	0.00384	0.000636121
289.735	0.00318	0.0038	0.000637136
292.54	0.00317	0.00377	0.000638344
295.354	0.00316	0.00374	0.000640414
298.182	0.00314	0.00371	0.000641458
301.021	0.00313	0.00369	0.000642147
303.875	0.00312	0.00365	0.000643886
306.74	0.00311	0.00363	0.000644999
309.615	0.0031	0.0036	0.000645724
312.5	0.00309	0.00357	0.00064868
315.398	0.00308	0.00355	0.000647964
318.309	0.00306	0.00352	0.000649017
321.229	0.00305	0.0035	0.000649855
324.16	0.00304	0.00347	0.000651794
327.1	0.00304	0.00345	0.000652201
330.048	0.00303	0.00344	0.000653422
333.01	0.00302	0.00341	0.00065308
335.98	0.00301	0.00339	0.000654299
338.959	0.003	0.00337	0.000655756
341.948	0.00299	0.00335	0.000655765
344.944	0.00299	0.00333	0.000657426
347.952	0.00297	0.00331	0.000657932
350.968	0.00297	0.00329	0.000659061
353.99	0.00296	0.00328	0.000660718
357.019	0.00296	0.00326	0.000660885
360.059	0.00295	0.00324	0.000660621
363.107	0.00294	0.00323	0.000660737
366.16	0.00293	0.00321	0.000661987
369.22	0.00293	0.0032	0.000662802
372.287	0.00292	0.00318	0.000663958
375.361	0.00292	0.00317	0.000665442
378.443	0.00291	0.00315	0.000665047
381.533	0.0029	0.00314	0.000664705
384.627	0.0029	0.00313	0.000666563
387.728	0.0029	0.00312	0.000666252
390.835	0.00289	0.0031	0.00066698
393.949	0.00288	0.00309	0.000667141
397.068	0.00288	0.00308	0.000668025
400.194	0.00287	0.00307	0.000668315
403.323	0.00287	0.00306	0.000669374
406.458	0.00287	0.00305	0.00066906
409.598	0.00286	0.00304	0.000670096
412.742	0.00286	0.00303	0.000670143
415.891	0.00286	0.00302	0.00067064
419.044	0.00285	0.00301	0.000672002
422.207	0.00284	0.003	0.00067054
425.373	0.00284	0.00299	0.000670655
428.544	0.00284	0.00298	0.00067113
431.715	0.00284	0.00297	0.000673647
434.889	0.00284	0.00297	0.000673658
438.068	0.00283	0.00296	0.000673858
441.256	0.00282	0.00295	0.000672932
444.448	0.00282	0.00294	0.000672984
447.638	0.00282	0.00294	0.000674697
450.832	0.00282	0.00293	0.000675315
454.029	0.00282	0.00293	0.000674771
457.234	0.00281	0.00291	0.000674357
460.439	0.00281	0.00291	0.00067537
463.649	0.00281	0.00291	0.00067467
466.862	0.0028	0.0029	0.00067596
470.077	0.0028	0.00289	0.000676033
473.297	0.0028	0.00289	0.000675556
476.516	0.0028	0.00288	0.000677025
479.742	0.00279	0.00288	0.000675294
482.968	0.00279	0.00287	0.000676334
486.196	0.00279	0.00287	0.000677178
489.429	0.00279	0.00286	0.000676206
492.661	0.00279	0.00286	0.000676621
495.897	0.00279	0.00286	0.000676566
499.132	0.00279	0.00286	0.000677469
502.374	0.00278	0.00285	0.00067728
505.616	0.00278	0.00284	0.000678501
508.86	0.00278	0.00284	0.000678404
512.105	0.00278	0.00284	0.000678986
515.353	0.00278	0.00284	0.000677509
518.602	0.00278	0.00283	0.000678908
521.854	0.00277	0.00283	0.000678348
525.104	0.00278	0.00282	0.000679638
528.361	0.00277	0.00282	0.000678314
531.617	0.00277	0.00282	0.000679128
534.87	0.00277	0.00282	0.000680321
538.131	0.00277	0.00281	0.000678332
541.39	0.00277	0.00281	0.000679313
544.652	0.00277	0.00281	0.000679624
547.916	0.00277	0.00281	0.000679278
551.18	0.00276	0.0028	0.000679547
554.445	0.00277	0.0028	0.000679989
557.711	0.00276	0.0028	0.00067886
560.98	0.00276	0.0028	0.000679673
564.251	0.00276	0.00279	0.000679557
567.523	0.00276	0.00279	0.000680012
570.796	0.00276	0.00279	0.000680104
574.067	0.00276	0.00279	0.000680447
577.339	0.00276	0.00279	0.000680889
580.612	0.00276	0.00278	0.0006808
583.889	0.00276	0.00278	0.000679428
587.165	0.00276	0.00278	0.000680945
590.444	0.00275	0.00278	0.000680307
593.724	0.00275	0.00278	0.000680378
597.006	0.00275	0.00278	0.000679304
600.284	0.00276	0.00278	0.000681476
603.565	0.00275	0.00278	0.000680084
606.844	0.00275	0.00277	0.000682236
610.124	0.00275	0.00277	0.000681218
613.406	0.00275	0.00277	0.000680575
616.691	0.00275	0.00277	0.000680621
619.977	0.00275	0.00277	0.000680369
623.261	0.00275	0.00277	0.000681812
626.546	0.00275	0.00277	0.000681148
629.831	0.00275	0.00276	0.000681939
633.117	0.00275	0.00276	0.000681388
636.403	0.00275	0.00276	0.000681383
639.692	0.00275	0.00276	0.000681006
642.978	0.00275	0.00276	0.000681396
646.265	0.00275	0.00276	0.000681652
649.553	0.00275	0.00276	0.000680558
652.844	0.00275	0.00276	0.000680993
656.137	0.00274	0.00276	0.000680747
659.426	0.00275	0.00276	0.00068174
662.714	0.00275	0.00276	0.000682142
666.004	0.00275	0.00276	0.000681338
669.294	0.00275	0.00276	0.000681504
672.584	0.00275	0.00276	0.000682336
675.874	0.00275	0.00276	0.000682437
679.163	0.00275	0.00276	0.000682473
682.455	0.00274	0.00275	0.000682096
685.748	0.00274	0.00275	0.000681864
689.038	0.00275	0.00275	0.000682059
692.331	0.00274	0.00275	0.000681167
695.625	0.00274	0.00275	0.000681522
698.922	0.00274	0.00275	0.000680957
702.215	0.00274	0.00275	0.000682896
705.51	0.00274	0.00275	0.000681566
708.804	0.00274	0.00275	0.000682244
712.094	0.00275	0.00275	0.000682342
715.39	0.00274	0.00275	0.000681637
718.684	0.00274	0.00275	0.000682674
721.98	0.00274	0.00275	0.000681436
725.276	0.00274	0.00275	0.000682369
728.572	0.00274	0.00275	0.000681887
731.868	0.00274	0.00275	0.000682009
735.162	0.00274	0.00275	0.000682692
738.455	0.00274	0.00275	0.000682491
741.755	0.00274	0.00274	0.000681844
745.049	0.00274	0.00274	0.000683241
748.345	0.00274	0.00275	0.000682216
751.638	0.00274	0.00275	0.000682475
754.932	0.00274	0.00275	0.000683136
758.229	0.00274	0.00275	0.000680834
761.527	0.00274	0.00274	0.000682576
764.822	0.00274	0.00274	0.000682626
768.121	0.00274	0.00274	0.000681569
771.418	0.00274	0.00274	0.000682604
774.719	0.00274	0.00274	0.000681338
778.017	0.00274	0.00274	0.000682718
781.314	0.00274	0.00274	0.00068219
784.612	0.00274	0.00274	0.00068278
787.911	0.00274	0.00274	0.000681534
791.207	0.00274	0.00275	0.000682256
794.505	0.00274	0.00274	0.000682382
797.802	0.00274	0.00274	0.000682615
801.098	0.00274	0.00274	0.000682593
804.396	0.00274	0.00274	0.000682456
807.697	0.00274	0.00274	0.000681622
810.995	0.00274	0.00274	0.000682476
814.296	0.00274	0.00274	0.000682541
817.593	0.00274	0.00274	0.000683299
820.891	0.00274	0.00274	0.000683256
824.187	0.00274	0.00274	0.000683291
827.487	0.00274	0.00274	0.000682288
830.784	0.00274	0.00274	0.000682827
834.081	0.00274	0.00274	0.000682189
837.382	0.00274	0.00274	0.000681522
840.68	0.00274	0.00274	0.000683007
843.979	0.00274	0.00274	0.000682656
847.278	0.00274	0.00274	0.000682937
850.575	0.00274	0.00274	0.000683027
853.874	0.00274	0.00274	0.000683103
857.174	0.00274	0.00274	0.000682724
860.476	0.00274	0.00274	0.000681846
863.774	0.00274	0.00274	0.000682082
867.072	0.00274	0.00274	0.000683006
870.373	0.00274	0.00274	0.000681907
873.674	0.00274	0.00274	0.000681061
876.975	0.00274	0.00274	0.000681983
880.278	0.00274	0.00274	0.000680695
883.58	0.00274	0.00274	0.000682039
886.88	0.00274	0.00274	0.000682689
890.179	0.00274	0.00274	0.000683282
893.48	0.00274	0.00274	0.000682191
896.777	0.00274	0.00274	0.000683559
900.078	0.00274	0.00274	0.000682456
903.379	0.00274	0.00274	0.000683023
906.678	0.00274	0.00274	0.000681965
909.977	0.00274	0.00274	0.000683369
913.278	0.00274	0.00274	0.000681842
916.576	0.00274	0.00274	0.000683609
919.876	0.00274	0.00274	0.000682092
923.177	0.00274	0.00274	0.00068203
926.478	0.00274	0.00274	0.000683019
929.777	0.00274	0.00274	0.000683251
933.077	0.00274	0.00274	0.000682586
936.376	0.00274	0.00274	0.000682617
939.678	0.00274	0.00274	0.000681924
942.977	0.00274	0.00274	0.000682607
946.278	0.00274	0.00274	0.000681539
949.578	0.00274	0.00274	0.000681997
952.879	0.00274	0.00274	0.000682629
956.183	0.00273	0.00273	0.000681634
959.48	0.00274	0.00274	0.000683147
962.781	0.00274	0.00274	0.000682281
966.083	0.00274	0.00274	0.000682077
969.384	0.00274	0.00274	0.000682802
972.688	0.00274	0.00274	0.000681553
975.989	0.00274	0.00274	0.00068299
979.286	0.00274	0.00274	0.000683449
982.588	0.00274	0.00274	0.000682221
985.888	0.00274	0.00274	0.000682855
989.191	0.00274	0.00274	0.000680735
992.493	0.00274	0.00274	0.000681866
995.795	0.00274	0.00274	0.000681476
999.097	0.00274	0.00274	0.000682114
1002.4	0.00274	0.00274	0.000682096
1005.7	0.00274	0.00274	0.000682391
1009	0.00274	0.00274	0.000682769
1012.3	0.00274	0.00274	0.000682333
1015.6	0.00274	0.00274	0.000682415
1018.9	0.00274	0.00274	0.000682883
1022.21	0.00274	0.00273	0.000682193
1025.51	0.00274	0.00274	0.000682742
1028.81	0.00274	0.00274	0.000682367
1032.12	0.00273	0.00274	0.000681304
1035.42	0.00274	0.00273	0.000682814
1038.72	0.00274	0.00274	0.00068223
1042.02	0.00274	0.00273	0.000682589
1045.32	0.00274	0.00273	0.000683563
1048.62	0.00274	0.00274	0.000681788
1051.92	0.00274	0.00274	0.000682875
1055.23	0.00274	0.00274	0.000682353
1058.52	0.00274	0.00274	0.000683481
1061.83	0.00274	0.00274	0.000681642
1065.13	0.00274	0.00274	0.000683277
1068.43	0.00274	0.00274	0.000682543
1071.73	0.00274	0.00274	0.000682173
1075.03	0.00274	0.00274	0.000682276
1078.33	0.00274	0.00274	0.000683587
1081.63	0.00274	0.00274	0.000681514
1084.93	0.00274	0.00274	0.00068224
1088.24	0.00273	0.00273	0.000681763
1091.54	0.00274	0.00274	0.00068228
1094.84	0.00274	0.00274	0.000681964
1098.14	0.00274	0.00274	0.000683005
1101.45	0.00274	0.00274	0.000681202
1104.74	0.00274	0.00274	0.000684323
1108.04	0.00274	0.00274	0.000682737
1111.34	0.00274	0.00274	0.000683574
1114.65	0.00274	0.00274	0.000681362
1117.95	0.00274	0.00274	0.000682812
1121.25	0.00274	0.00274	0.000682734
1124.54	0.00274	0.00274	0.000683207
1127.84	0.00274	0.00274	0.000683805
1131.14	0.00274	0.00274	0.000682799
1134.44	0.00274	0.00274	0.000683136
1137.74	0.00274	0.00274	0.000681618
1141.04	0.00274	0.00274	0.000682112
1144.34	0.00274	0.00274	0.000682583
1147.65	0.00274	0.00274	0.000682692
1150.94	0.00274	0.00274	0.000683314
1154.24	0.00274	0.00274	0.000683294
1157.54	0.00274	0.00274	0.000682941
1160.84	0.00274	0.00274	0.000682201
1164.14	0.00274	0.00274	0.000682559
1167.45	0.00274	0.00274	0.000682466
1170.75	0.00274	0.00274	0.000682088
1174.05	0.00274	0.00274	0.000682024
1177.35	0.00274	0.00274	0.000682243
1180.65	0.00274	0.00274	0.000683386
1183.95	0.00274	0.00274	0.000682028
1187.25	0.00274	0.00274	0.000682746
1190.55	0.00274	0.00274	0.000682207
1193.85	0.00274	0.00274	0.00068313
1197.15	0.00274	0.00274	0.000681268
1200	0.00274	0.00274	0.000682309
1200	0	0.00135	0
1229.48	0	0.00144	0.000674809
1270.83	0	0.000670152	0.000657532
1324.52	0	0.000317504	0.000633928
1389.8	0	0.000159371	0.000606716
1465.99	0	7.87287e-05	0.000575347
1552.26	0	3.61677e-05	0.000541265
1647.92	0	1.51887e-05	0.000505581
1752.83	0	5.84049e-06	0.000468999
1867.62	0	2.04872e-06	0.000431935
1993.67	0	6.51546e-07	0.000394576
2133.04	0	1.82761e-07	0.000357238
2288.7	0	4.55536e-08	0.000320003
2400	0	1.28005e-08	0.000289316

## Sheet: Fig 2c
time	dye-cat2OH2	dye-cat3OH2	dye-cat3OOH	dye-cat4O	dyecat4OO	dye-cat5O
s	percent	percent	percent	percent	percent	percent
0	100	0	0	0	0	0
0.000169938	99.0099	0.98516	0	0	0	0
0.000340247	98.0276	1.95274	0	1.66054e-07	0	0
0.000510859	97.0527	2.90335	0	1.66054e-07	0	0
0.000681856	96.0855	3.83667	0	6.64216e-07	0	0
0.000853262	95.126	4.75296	0	1.82659e-06	0	0
0.00103	94.1738	5.65282	0	2.65686e-06	0	1.66054e-07
0.0012	93.2287	6.5365	0	3.48713e-06	0	3.32108e-07
0.00137	92.2907	7.40404	0	6.14399e-06	0	3.32108e-07
0.00154	91.3601	8.25531	0	7.97059e-06	0	3.32108e-07
0.00172	90.4364	9.09095	0	9.13296e-06	0	4.98162e-07
0.00189	89.5197	9.91089	0	1.21219e-05	0	8.30269e-07
0.00206	88.6098	10.7154	0	1.87641e-05	0	9.96323e-07
0.00224	87.7068	11.5044	0	2.40778e-05	0	1.49448e-06
0.00241	86.8104	12.2787	0	2.83952e-05	0	1.66054e-06
0.00259	85.9203	13.0386	0	3.4041e-05	0	1.82659e-06
0.00277	85.037	13.783	0	3.96869e-05	0	2.1587e-06
0.00294	84.1602	14.5131	0	4.88198e-05	0	2.65686e-06
0.00312	83.2898	15.2287	0	5.8617e-05	0	3.15502e-06
0.0033	82.4256	15.9304	0	6.82481e-05	0	3.32108e-06
0.00348	81.5675	16.6185	0	7.78793e-05	0	4.15135e-06
0.00366	80.7157	17.2924	0	8.73443e-05	0	5.31372e-06
0.00384	79.87	17.9523	0	0.000100629	0	6.31005e-06
0.00402	79.0306	18.5985	0	0.000114743	0	7.97059e-06
0.0042	78.1965	19.2321	0	0.000130518	0	9.13296e-06
0.00438	77.3686	19.8518	0	0.000145131	0	1.07935e-05
0.00456	76.5466	20.4588	0	0.000165058	0	1.12917e-05
0.00475	75.7304	21.0525	0	0.00018432	0	1.26201e-05
0.00493	74.9199	21.6334	0	0.000204578	0	1.41146e-05
0.00511	74.1148	22.2018	0	0.000225999	0	1.61072e-05
0.0053	73.3157	22.7573	0	0.000244929	0	1.8598e-05
0.00548	72.5218	23.3008	0	0.000267679	0	2.09228e-05
0.00567	71.7335	23.8317	0	0.000297569	0	2.42439e-05
0.00586	70.951	24.3498	0	0.000324967	0	2.72328e-05
0.00605	70.1732	24.8569	0	0.000348713	0	3.22145e-05
0.00624	69.401	25.3514	0	0.000377274	0	3.55355e-05
0.00643	68.6337	25.8349	0	0.000411149	0	3.93548e-05
0.00662	67.8726	26.305	0	0.000446851	0	4.53327e-05
0.00681	67.1163	26.7638	0	0.000486206	0	4.99822e-05
0.007	66.3655	27.2107	0	0.000525561	0	5.57941e-05
0.00719	65.6194	27.6466	0	0.000570395	0	6.02776e-05
0.00739	64.8785	28.0709	0	0.000610414	0	6.87463e-05
0.00758	64.1426	28.4839	0	0.000651263	0	7.65508e-05
0.00778	63.4116	28.8856	0	0.000702242	0	8.56838e-05
0.00797	62.6851	29.2773	0	0.00075787	0	9.08315e-05
0.00817	61.964	29.6575	0	0.000809845	0	0.000100297
0.00837	61.2472	30.0274	0	0.000860325	0	0.000111422
0.00857	60.5355	30.3858	0	0.000916119	0	0.000121551
0.00877	59.8289	30.733	0	0.000970253	0	0.000134338
0.00897	59.1265	31.0707	0	0.00103	0	0.000146293
0.00917	58.4294	31.3967	0	0.00109	0	0.00016074
0.00938	57.7362	31.7135	0	0.00114	0	0.000175021
0.00958	57.0477	32.02	0	0.00121	0	0.000187641
0.00979	56.364	32.3156	0	0.00128	0	0.000202254
0.00999	55.6849	32.6012	0	0.00135	0	0.000217198
0.0102	55.0103	32.8763	0	0.00143	0	0.000232143
0.01041	54.3398	33.1423	0	0.00151	0	0.000248085
0.01062	53.6738	33.3981	0	0.0016	0	0.000265188
0.01083	53.0125	33.6434	0	0.00168	0	0.000285613
0.01105	52.355	33.8801	0	0.00176	0	0.00030886
0.01126	51.7022	34.1063	0	0.00184	0	0.000337588
0.01148	51.0535	34.3232	0	0.00192	0	0.00036233
0.01169	50.409	34.5308	0	0.00202	0	0.000389064
0.01191	49.769	34.7284	0	0.00211	0	0.000416629
0.01213	49.133	34.9168	0	0.00221	0	0.000447349
0.01235	48.5016	35.0951	0	0.0023	0	0.000479398
0.01257	47.8739	35.2649	0	0.0024	0	0.000507793
0.0128	47.2506	35.4251	0	0.00251	0	0.000536022
0.01302	46.6313	35.5758	0	0.00262	0	0.000568735
0.01325	46.0157	35.718	0	0.00272	0	0.000606927
0.01348	45.4047	35.8503	0	0.00284	0	0.000643957
0.01371	44.7975	35.9738	0	0.00295	0	0.000680987
0.01394	44.1944	36.0884	0	0.00307	0	0.000719511
0.01417	43.5952	36.194	0	0.00319	0	0.000763848
0.01441	42.9999	36.291	0	0.00333	0	0.000810177
0.01464	42.4083	36.3792	0	0.00346	0	0.000850528
0.01488	41.8207	36.4591	0	0.00358	0	0.000898518
0.01512	41.2369	36.5303	0	0.00372	0	0.000956304
0.01536	40.6567	36.5932	0	0.00386	0	0.00101
0.01561	40.0805	36.6472	0	0.00401	0	0.00107
0.01585	39.5082	36.6925	0	0.00416	0	0.00114
0.0161	38.9397	36.729	0	0.00431	0	0.00119
0.01635	38.3747	36.7578	0	0.00447	0	0.00126
0.0166	37.8137	36.7776	0	0.00463	0	0.00132
0.01685	37.2569	36.7886	0	0.00479	0	0.00139
0.01711	36.7032	36.7918	0	0.00497	0	0.00147
0.01737	36.1535	36.7858	0	0.00513	0	0.00154
0.01763	35.6075	36.772	0	0.00531	0	0.00162
0.01789	35.0654	36.7495	0	0.0055	0	0.0017
0.01815	34.5263	36.7201	0	0.00568	0	0.00179
0.01842	33.9915	36.6815	0	0.00587	0	0.00188
0.01869	33.4599	36.6352	0	0.00607	0	0.00197
0.01896	32.932	36.5809	0	0.00626	0	0.00207
0.01923	32.4073	36.5187	0	0.00645	0	0.00217
0.01951	31.8863	36.4483	0	0.00665	0	0.00228
0.01979	31.3692	36.3696	0	0.00686	0	0.00239
0.02007	30.8548	36.2848	0	0.00707	0	0.0025
0.02036	30.3445	36.1907	0	0.00729	0	0.00262
0.02064	29.8376	36.0888	0	0.00751	0	0.00275
0.02093	29.3341	35.9795	0	0.00773	0	0.00288
0.02123	28.8343	35.862	0	0.00797	0	0.00301
0.02152	28.3377	35.7372	0	0.00821	0	0.00315
0.02182	27.8443	35.6048	0	0.00845	0	0.00329
0.02213	27.3549	35.4639	0	0.0087	0	0.00344
0.02243	26.8687	35.3156	0	0.00896	0	0.0036
0.02274	26.3858	35.1599	0	0.00922	0	0.00377
0.02306	25.9065	34.996	0	0.00947	0	0.00395
0.02337	25.4303	34.825	0	0.00975	0	0.00412
0.02369	24.958	34.6456	0	0.01003	0	0.00431
0.02402	24.4888	34.4593	0	0.01031	0	0.00449
0.02434	24.023	34.265	0	0.01059	0	0.00469
0.02468	23.5606	34.0634	0	0.0109	0	0.00489
0.02501	23.1016	33.8544	1.66054e-07	0.01118	0	0.00511
0.02535	22.6457	33.6383	1.66054e-07	0.01151	0	0.00534
0.0257	22.1933	33.414	1.66054e-07	0.0118	0	0.00557
0.02605	21.7443	33.1822	1.66054e-07	0.01212	0	0.00581
0.0264	21.2986	32.9432	1.66054e-07	0.01244	0	0.00606
0.02676	20.8562	32.6966	1.66054e-07	0.01275	0	0.00633
0.02712	20.417	32.4428	1.66054e-07	0.01308	0	0.00661
0.02749	19.9811	32.1817	3.32108e-07	0.01343	0	0.00689
0.02786	19.5488	31.9126	3.32108e-07	0.01377	0	0.0072
0.02824	19.1196	31.6364	3.32108e-07	0.01414	0	0.0075
0.02863	18.6938	31.3523	3.32108e-07	0.01449	0	0.00783
0.02902	18.2711	31.0613	3.32108e-07	0.01486	0	0.00818
0.02941	17.8519	30.7628	3.32108e-07	0.01523	0	0.00852
0.02982	17.4358	30.4572	3.32108e-07	0.0156	0	0.00889
0.03022	17.0229	30.1443	3.32108e-07	0.01598	0	0.00926
0.03064	16.6131	29.8243	3.32108e-07	0.01637	1.66054e-07	0.00967
0.03106	16.2067	29.4966	3.32108e-07	0.01678	1.66054e-07	0.01008
0.03149	15.8039	29.1611	3.32108e-07	0.01718	1.66054e-07	0.01051
0.03193	15.4047	28.8179	3.32108e-07	0.01763	1.66054e-07	0.01096
0.03237	15.0086	28.4674	3.32108e-07	0.01806	1.66054e-07	0.01142
0.03283	14.6157	28.11	4.98162e-07	0.0185	1.66054e-07	0.01191
0.03329	14.2258	27.7453	4.98162e-07	0.01896	1.66054e-07	0.0124
0.03376	13.8396	27.373	4.98162e-07	0.01942	1.66054e-07	0.01294
0.03424	13.4564	26.9936	6.64216e-07	0.01989	1.66054e-07	0.01349
0.03473	13.0767	26.6065	6.64216e-07	0.02041	1.66054e-07	0.01405
0.03522	12.7003	26.2121	6.64216e-07	0.02092	1.66054e-07	0.01466
0.03573	12.3274	25.8096	6.64216e-07	0.02143	1.66054e-07	0.01528
0.03625	11.958	25.3997	8.30269e-07	0.02192	1.66054e-07	0.01594
0.03678	11.592	24.9819	8.30269e-07	0.02242	1.66054e-07	0.01664
0.03733	11.2295	24.5563	6.64216e-07	0.02298	3.32108e-07	0.01735
0.03788	10.87	24.1239	6.64216e-07	0.0235	3.32108e-07	0.01811
0.03845	10.5143	23.683	8.30269e-07	0.02407	3.32108e-07	0.01888
0.03903	10.1614	23.2359	8.30269e-07	0.02465	3.32108e-07	0.01971
0.03963	9.81207	22.7809	8.30269e-07	0.0252	3.32108e-07	0.02058
0.04024	9.46623	22.3181	1.32843e-06	0.02578	3.32108e-07	0.02149
0.04087	9.12381	21.8478	1.49448e-06	0.02637	3.32108e-07	0.02245
0.04152	8.78507	21.3692	1.49448e-06	0.02696	3.32108e-07	0.02347
0.04218	8.44956	20.8832	1.49448e-06	0.02758	4.98162e-07	0.02452
0.04286	8.11806	20.3885	1.49448e-06	0.02828	4.98162e-07	0.0256
0.04357	7.79005	19.886	1.49448e-06	0.02891	4.98162e-07	0.02679
0.04429	7.46548	19.376	1.49448e-06	0.02954	4.98162e-07	0.02803
0.04504	7.14472	18.8573	1.66054e-06	0.03022	4.98162e-07	0.02935
0.04582	6.82759	18.3308	1.82659e-06	0.03089	4.98162e-07	0.03073
0.04662	6.51461	17.7949	1.99265e-06	0.03161	4.98162e-07	0.03219
0.04745	6.20495	17.2516	2.32475e-06	0.03231	4.98162e-07	0.03376
0.04831	5.89908	16.7001	2.65686e-06	0.03302	4.98162e-07	0.03542
0.04921	5.59743	16.1392	2.65686e-06	0.03378	4.98162e-07	0.03714
0.05015	5.29958	15.5702	2.82292e-06	0.03457	4.98162e-07	0.039
0.05112	5.00561	14.9925	2.82292e-06	0.0354	8.30269e-07	0.04096
0.05214	4.7157	14.4057	2.82292e-06	0.03622	9.96323e-07	0.0431
0.0532	4.42993	13.81	3.48713e-06	0.03702	9.96323e-07	0.04543
0.05433	4.14828	13.2054	3.65319e-06	0.03794	9.96323e-07	0.0479
0.05551	3.87103	12.591	3.81924e-06	0.03879	9.96323e-07	0.05056
0.05675	3.59826	11.967	4.15135e-06	0.03974	1.66054e-06	0.05342
0.05808	3.3301	11.333	4.15135e-06	0.04065	2.32475e-06	0.05654
0.05948	3.06649	10.689	4.98162e-06	0.0416	2.49081e-06	0.0599
0.06099	2.80795	10.0343	4.81556e-06	0.0426	3.32108e-06	0.06358
0.06261	2.55411	9.36935	5.14767e-06	0.04361	3.65319e-06	0.06766
0.06435	2.30521	8.69411	5.47978e-06	0.04467	3.98529e-06	0.07217
0.06626	2.06213	8.00649	6.80821e-06	0.04576	4.48345e-06	0.07719
0.06835	1.82462	7.30769	7.30637e-06	0.04691	5.81189e-06	0.08283
0.07066	1.59323	6.59577	7.63848e-06	0.04809	7.14032e-06	0.08927
0.07327	1.36807	5.87169	9.63113e-06	0.04928	7.30637e-06	0.09668
0.07624	1.14959	5.13402	1.29522e-05	0.05054	7.97059e-06	0.10533
0.0797	0.93858	4.38232	1.37825e-05	0.0518	1.06274e-05	0.11571
0.08385	0.73599	3.61542	1.46127e-05	0.0532	1.44467e-05	0.12857
0.08904	0.54268	2.83297	1.76017e-05	0.05458	1.77678e-05	0.14493
0.09599	0.36118	2.03301	2.02586e-05	0.05625	2.62365e-05	0.16745
0.10651	0.19501	1.21781	2.44099e-05	0.05801	4.08493e-05	0.2027
0.1284	0.05406	0.40715	3.55355e-05	0.06003	8.03701e-05	0.27859
0.26177	2.34136e-05	0.000350208	0.000117234	0.06075	0.000654584	0.75346
0.49385	3.32108e-07	1.21219e-05	0.00025207	0.0605	0.00311	1.57694
0.72757	1.66054e-07	1.39485e-05	0.000385245	0.05998	0.00739	2.39722
0.96244	3.32108e-07	1.11256e-05	0.000525893	0.05951	0.01359	3.21338
1.19911	3.32108e-07	1.41146e-05	0.000658404	0.05898	0.02171	4.02557
1.43708	8.30269e-07	1.57751e-05	0.000783608	0.0585	0.03169	4.83418
1.6766	6.64216e-07	1.39485e-05	0.000939201	0.05803	0.04362	5.63893
1.91772	1.16238e-06	1.14577e-05	0.00107	0.05766	0.05745	6.43982
2.16021	6.64216e-07	1.2454e-05	0.00119	0.05673	0.07325	7.237
2.4043	8.30269e-07	1.49448e-05	0.00129	0.05649	0.09102	8.02992
2.64994	1.66054e-06	1.41146e-05	0.00146	0.05586	0.11073	8.81902
2.89719	1.66054e-06	1.47788e-05	0.00157	0.05538	0.13253	9.60392
3.14604	1.32843e-06	1.27861e-05	0.00169	0.05498	0.15624	10.385
3.39654	2.32475e-06	1.66054e-05	0.00184	0.05442	0.18192	11.1621
3.64855	1.99265e-06	1.36164e-05	0.00197	0.05394	0.20964	11.9351
3.90223	1.49448e-06	1.47788e-05	0.00207	0.05357	0.23946	12.704
4.15747	3.65319e-06	1.51109e-05	0.00218	0.05303	0.27148	13.4685
4.4145	3.65319e-06	1.74357e-05	0.00231	0.05261	0.30546	14.2289
4.67317	5.47978e-06	1.5277e-05	0.00243	0.05223	0.3416	14.9849
4.93371	4.15135e-06	1.71036e-05	0.00259	0.05153	0.3799	15.7368
5.19599	6.4761e-06	1.66054e-05	0.00272	0.05117	0.42025	16.4842
5.45998	4.48345e-06	1.46127e-05	0.00282	0.05044	0.46277	17.2276
5.72569	6.4761e-06	1.94283e-05	0.00294	0.05013	0.50736	17.9665
5.99308	6.64216e-06	1.72696e-05	0.00302	0.04971	0.55423	18.7009
6.26258	7.30637e-06	2.1587e-05	0.00319	0.04913	0.60337	19.4309
6.53376	8.96691e-06	1.8598e-05	0.00328	0.0486	0.65473	20.1563
6.80707	8.6348e-06	2.25833e-05	0.00341	0.04812	0.70829	20.8772
7.08227	1.12917e-05	1.79338e-05	0.00353	0.04776	0.76422	21.5935
7.35927	1.29522e-05	2.27494e-05	0.00365	0.04738	0.8225	22.305
7.63845	1.02953e-05	2.12549e-05	0.00382	0.04674	0.88285	23.0122
7.91928	9.29902e-06	2.30815e-05	0.00389	0.04636	0.94577	23.7142
8.20197	1.27861e-05	2.17531e-05	0.00399	0.04583	1.01075	24.4122
8.48676	1.16238e-05	2.49081e-05	0.0041	0.04544	1.07793	25.1055
8.77346	1.57751e-05	2.35797e-05	0.00421	0.04488	1.14783	25.7933
9.06248	1.47788e-05	2.60705e-05	0.00429	0.04445	1.21984	26.477
9.35354	1.69375e-05	2.44099e-05	0.00441	0.04397	1.29426	27.1557
9.64653	1.8432e-05	2.52402e-05	0.00453	0.04356	1.37112	27.8296
9.94178	1.99265e-05	2.65686e-05	0.00467	0.04304	1.4506	28.4981
10.2393	1.94283e-05	2.90594e-05	0.00481	0.04251	1.53236	29.1619
10.539	1.87641e-05	2.60705e-05	0.00488	0.04218	1.61687	29.8201
10.8407	2.20852e-05	2.65686e-05	0.00498	0.04186	1.70366	30.4737
11.1448	2.34136e-05	2.97236e-05	0.00506	0.04134	1.79304	31.1223
11.4511	2.44099e-05	3.50374e-05	0.00522	0.04083	1.88503	31.7653
11.7599	2.39118e-05	3.50374e-05	0.00534	0.04026	1.97971	32.4032
12.0711	2.50741e-05	3.4041e-05	0.00541	0.03992	2.0769	33.0355
12.3847	2.98897e-05	3.50374e-05	0.00552	0.03949	2.17655	33.663
12.7003	2.83952e-05	3.703e-05	0.00558	0.03902	2.27884	34.2851
13.0184	3.17163e-05	3.95208e-05	0.00576	0.03855	2.38368	34.902
13.3388	3.15502e-05	4.28419e-05	0.00585	0.0382	2.49132	35.5131
13.6619	3.47053e-05	4.3008e-05	0.00592	0.0377	2.60172	36.1186
13.9874	3.73621e-05	3.76942e-05	0.00603	0.03728	2.71471	36.7187
14.3157	3.4041e-05	4.38382e-05	0.0061	0.03684	2.83043	37.3134
14.6465	3.71961e-05	4.56648e-05	0.00618	0.03632	2.94885	37.9025
14.9796	3.88566e-05	4.9152e-05	0.00632	0.0359	3.06995	38.4861
15.3158	4.54988e-05	4.64951e-05	0.00643	0.03554	3.19393	39.0636
15.6543	4.18456e-05	5.33033e-05	0.00647	0.03501	3.32108	39.6351
15.9957	4.36722e-05	5.42996e-05	0.00658	0.03463	3.45076	40.2011
16.3398	4.16795e-05	5.28051e-05	0.00668	0.03407	3.58341	40.7612
16.6866	4.99822e-05	5.03143e-05	0.00675	0.03377	3.71889	41.3152
17.0363	5.28051e-05	5.67904e-05	0.00682	0.03341	3.85723	41.8634
17.389	5.08125e-05	6.14399e-05	0.00698	0.03279	3.99886	42.4049
17.7445	5.28051e-05	6.39307e-05	0.00707	0.03259	4.14333	42.9405
18.1029	5.72886e-05	6.26023e-05	0.00713	0.03207	4.29078	43.4701
18.4642	5.66244e-05	6.02776e-05	0.00713	0.0318	4.44121	43.9935
18.8289	6.74179e-05	6.70858e-05	0.00729	0.03125	4.59471	44.5105
19.1961	6.01115e-05	6.65876e-05	0.00737	0.03082	4.75131	45.021
19.5665	6.24363e-05	6.35986e-05	0.00749	0.03043	4.9108	45.5256
19.94	6.44289e-05	7.22334e-05	0.00756	0.02998	5.07357	46.0234
20.317	7.10711e-05	7.02408e-05	0.00758	0.02954	5.2396	46.5147
20.6973	7.37279e-05	7.3894e-05	0.00774	0.02928	5.40886	46.999
21.0806	6.1772e-05	7.97059e-05	0.00782	0.02884	5.58106	47.4774
21.4674	7.33958e-05	8.21967e-05	0.00782	0.02846	5.75653	47.9492
21.8576	7.37279e-05	7.93738e-05	0.00797	0.02807	5.93504	48.4143
22.2511	7.23995e-05	9.09975e-05	0.00803	0.02761	6.11704	48.8724
22.6485	7.65508e-05	8.38572e-05	0.00807	0.02727	6.30239	49.3235
23.0489	8.10343e-05	9.14957e-05	0.00817	0.02681	6.49058	49.7687
23.453	8.33591e-05	8.98352e-05	0.00824	0.02652	6.68216	50.2069
23.8605	8.6348e-05	9.29902e-05	0.0083	0.0261	6.87766	50.6368
24.2717	8.88388e-05	9.38204e-05	0.00833	0.02573	7.07625	51.0601
24.6867	9.91342e-05	9.96323e-05	0.00844	0.02536	7.27823	51.4765
25.1052	9.2492e-05	0.000102123	0.00852	0.02492	7.48368	51.8858
25.528	9.78057e-05	0.000100297	0.00857	0.02461	7.69248	52.2878
25.9542	9.64773e-05	0.000105444	0.00862	0.0242	7.90498	52.6821
26.3843	0.000101625	0.00010395	0.00868	0.02384	8.12082	53.0696
26.8186	0.000112917	0.000113415	0.00875	0.02348	8.33989	53.4498
27.2574	0.000113581	0.000111256	0.00882	0.02322	8.56277	53.8222
27.7	0.000119061	0.000115241	0.00885	0.02275	8.78925	54.1873
28.1468	0.000110758	0.000117732	0.00891	0.0224	9.01947	54.5444
28.5978	0.000111588	0.000125371	0.00903	0.02204	9.25328	54.894
29.0529	0.000119725	0.000133507	0.009	0.02173	9.49079	55.2359
29.5125	0.000125371	0.000125039	0.00918	0.02136	9.73191	55.5699
29.9762	0.000128692	0.000127197	0.00912	0.02104	9.97677	55.8964
30.4445	0.000126367	0.000141478	0.0092	0.02058	10.2251	56.215
30.9172	0.000139153	0.00013633	0.00928	0.02017	10.4769	56.5264
31.395	0.000142972	0.000134836	0.0093	0.01999	10.7333	56.8285
31.8773	0.000146626	0.000146293	0.00937	0.01965	10.9928	57.1234
32.3641	0.000144301	0.000154762	0.00937	0.01928	11.2565	57.4096
32.856	0.000141644	0.000151773	0.00946	0.01891	11.5239	57.6876
33.3528	0.000153434	0.000157087	0.00957	0.01855	11.7952	57.9572
33.8545	0.000150943	0.000163563	0.00953	0.0182	12.0704	58.2188
34.3609	0.00015443	0.000163065	0.00957	0.0178	12.3497	58.4716
34.8731	0.000161404	0.000154098	0.00962	0.01765	12.6327	58.7164
35.3904	0.000166054	0.00015991	0.0096	0.0173	12.9201	58.952
35.9128	0.000169873	0.000169043	0.00961	0.01691	13.211	59.18
36.4405	0.000179006	0.000165058	0.00967	0.01669	13.5062	59.3985
36.9737	0.000173194	0.00018598	0.00982	0.01628	13.8053	59.6087
37.5122	0.000186146	0.000183656	0.00984	0.01602	14.1087	59.8097
38.0563	0.000185316	0.000182825	0.00984	0.01576	14.4159	60.0023
38.6061	0.000197438	0.0001898	0.00989	0.01533	14.7272	60.1862
39.1618	0.000196608	0.000193453	0.00991	0.01507	15.0424	60.3613
39.7238	0.000202088	0.000191626	0.00989	0.01475	15.3621	60.5272
40.2911	0.00020242	0.000203084	0.00992	0.01444	15.6855	60.6849
40.8647	0.000199099	0.000206903	0.01001	0.01427	16.0134	60.8323
41.4439	0.000216866	0.00020408	0.01	0.01403	16.3451	60.9717
42.0297	0.00020873	0.000217032	0.01	0.01366	16.6809	61.1018
42.6217	0.000218693	0.000221848	0.01005	0.01338	17.0209	61.2227
43.2198	0.000216534	0.000223509	0.01007	0.01309	17.3653	61.3341
43.8242	0.000229819	0.000231479	0.01001	0.01278	17.7137	61.4367
44.436	0.000228988	0.000234136	0.0101	0.01255	18.0664	61.5296
45.0544	0.00023563	0.000252734	0.01001	0.01224	18.423	61.6138
45.6793	0.000235298	0.000247752	0.01006	0.01203	18.784	61.6879
46.3116	0.000247586	0.00024742	0.01012	0.01176	19.1496	61.7523
46.9502	0.000244431	0.000261369	0.01009	0.01156	19.519	61.8078
47.5962	0.000251738	0.00024576	0.01014	0.01131	19.8929	61.8533
48.2495	0.000264856	0.000267015	0.01017	0.01097	20.2708	61.8899
48.9099	0.000264856	0.00027183	0.01008	0.01074	20.6533	61.9161
49.5773	0.000264192	0.000272328	0.01021	0.01038	21.0401	61.9325
50.253	0.000271498	0.000278804	0.01017	0.0102	21.431	61.9394
50.9363	0.000279967	0.000277144	0.01014	0.01001	21.8262	61.9365
51.6268	0.000273325	0.00029076	0.01013	0.00979	22.2256	61.9245
52.325	0.000292919	0.00029458	0.01007	0.00952	22.6292	61.9026
53.0314	0.000291923	0.00029458	0.0101	0.00923	23.0371	61.8707
53.7467	0.000303713	0.000293915	0.01017	0.00907	23.4493	61.8293
54.4697	0.000305041	0.000305373	0.01015	0.00885	23.8654	61.7782
55.2009	0.000308362	0.000304875	0.01013	0.00858	24.2849	61.7186
55.9404	0.000323971	0.000314008	0.01013	0.0084	24.7095	61.6482
56.6885	0.000327624	0.000324469	0.01007	0.00816	25.1381	61.5678
57.4458	0.000322975	0.000319654	0.01005	0.00799	25.5708	61.4782
58.2121	0.000335263	0.000343233	0.01009	0.00774	26.0075	61.3784
58.987	0.000346887	0.000343067	0.01002	0.00753	26.4484	61.2693
59.7712	0.000335263	0.000347883	0.01004	0.0073	26.8934	61.1501
60.5643	0.000355189	0.000345724	0.00999	0.00708	27.3424	61.0211
61.3668	0.00035851	0.000355023	0.00994	0.00695	27.7953	60.8831
62.1784	0.000371795	0.000361333	0.00995	0.00674	28.2517	60.7355
62.9993	0.000369304	0.00036399	0.01001	0.00657	28.7121	60.5784
63.8301	0.000376278	0.000365485	0.00984	0.00634	29.1767	60.4115
64.6714	0.000380097	0.000374618	0.00992	0.00623	29.6452	60.2348
65.5226	0.000388234	0.000399858	0.00985	0.00604	30.1174	60.0487
66.3831	0.00039471	0.00039554	0.00982	0.00589	30.5933	59.8532
67.2542	0.000400522	0.000407994	0.00981	0.00569	31.0732	59.6477
68.136	0.000394544	0.000419618	0.00972	0.00554	31.5567	59.4338
69.0277	0.000416131	0.000428751	0.0097	0.00538	32.0431	59.2107
69.93	0.000425762	0.000419784	0.00973	0.00521	32.5335	58.9783
70.8436	0.000422773	0.00041364	0.00964	0.00505	33.0275	58.7365
71.7678	0.000434729	0.000427589	0.00964	0.00493	33.5241	58.4866
72.7031	0.000435891	0.000435393	0.00952	0.00477	34.0244	58.2271
73.6493	0.000438216	0.000434231	0.00953	0.00463	34.5281	57.9585
74.6062	0.000451501	0.000457312	0.00947	0.00451	35.0345	57.6821
75.5751	0.000453659	0.000452663	0.00939	0.00429	35.5447	57.3961
76.5558	0.000462792	0.000449342	0.00939	0.00419	36.0574	57.1021
77.5478	0.00047342	0.000471095	0.0093	0.00402	36.573	56.7999
78.5529	0.000476076	0.000488531	0.00932	0.00395	37.0917	56.4886
79.5702	0.000484545	0.000474084	0.00924	0.00379	37.6135	56.1695
80.5985	0.000501483	0.000488697	0.00916	0.00368	38.1377	55.842
81.6388	0.000508291	0.000498992	0.00911	0.00359	38.6637	55.5076
82.6919	0.000519251	0.00049949	0.00902	0.00344	39.1926	55.1649
83.7584	0.000508457	0.000500154	0.00896	0.00337	39.7241	54.8147
84.8371	0.000507627	0.00049866	0.00895	0.00326	40.2576	54.457
85.9285	0.000529878	0.000529214	0.00881	0.00316	40.7936	54.0921
87.0334	0.000530044	0.000527553	0.00886	0.00302	41.3309	53.7206
88.1515	0.00054117	0.000553292	0.00878	0.00293	41.8708	53.341
89.2824	0.000536188	0.000550469	0.00868	0.00288	42.4115	52.9559
90.4266	0.000557609	0.00053104	0.00868	0.00275	42.955	52.563
91.584	0.000562092	0.000559103	0.00853	0.00264	43.4999	52.164
92.7563	0.000550303	0.000579694	0.0084	0.00258	44.0461	51.759
93.9401	0.000587997	0.000571724	0.00842	0.0025	44.5931	51.3484
95.1397	0.00058451	0.000571059	0.00836	0.00242	45.1416	50.9316
96.3516	0.000597296	0.000570229	0.00833	0.0023	45.6909	50.5094
97.5792	0.000588661	0.000580358	0.00828	0.00224	46.2409	50.0821
98.8208	0.00060261	0.000601945	0.00816	0.00219	46.7917	49.6495
100.076	0.000605266	0.000612241	0.00803	0.00213	47.3439	49.2111
101.347	0.000612905	0.000604602	0.00796	0.00203	47.8961	48.7684
102.632	0.000625857	0.000631171	0.00792	0.00199	48.4489	48.3204
103.932	0.000613569	0.000631005	0.00785	0.00191	49.0016	47.8689
105.246	0.000627186	0.000638643	0.00774	0.00186	49.5548	47.4123
106.577	0.000644621	0.000641798	0.00769	0.00182	50.1076	46.9522
107.922	0.000622204	0.00064047	0.00757	0.00177	50.6602	46.4884
109.282	0.000645119	0.000692113	0.00756	0.00169	51.2124	46.0211
110.657	0.000666042	0.000676171	0.0075	0.00168	51.7635	45.5516
112.048	0.000677832	0.000685304	0.00746	0.00161	52.314	45.079
113.455	0.000681651	0.000674677	0.00732	0.00154	52.8641	44.603
114.877	0.000696596	0.000698091	0.00723	0.0015	53.4131	44.1246
116.314	0.000683976	0.000686301	0.00716	0.00148	53.9606	43.6444
117.767	0.000699087	0.000697094	0.00711	0.00143	54.5073	43.1622
119.237	0.000704401	0.000706725	0.00693	0.00138	55.0525	42.678
120.723	0.000701246	0.000736117	0.00691	0.00136	55.5963	42.1919
122.225	0.000722168	0.000707224	0.00684	0.00133	56.1382	41.7047
123.743	0.000711707	0.000720176	0.00681	0.00128	56.6783	41.2164
125.278	0.000743921	0.000726818	0.0068	0.00127	57.2165	40.7268
126.829	0.000752888	0.000727482	0.00657	0.00122	57.7529	40.2368
128.397	0.000718681	0.000739438	0.00651	0.0012	58.2865	39.7466
129.982	0.000764346	0.000758534	0.00643	0.00119	58.8182	39.2563
131.583	0.00074608	0.000772815	0.00638	0.0012	59.3468	38.7663
133.201	0.00075953	0.000784605	0.00629	0.00113	59.8726	38.2766
134.835	0.000758534	0.000763018	0.00623	0.0011	60.396	37.787
136.488	0.000791247	0.000764512	0.00613	0.00109	60.9164	37.2981
138.157	0.000806358	0.000795896	0.00604	0.00108	61.4337	36.81
139.842	0.000792409	0.000795896	0.00596	0.00105	61.9482	36.3228
141.548	0.000791247	0.000804199	0.00592	0.00105	62.4592	35.8374
143.268	0.000808184	0.000792575	0.00581	0.00101	62.9665	35.3535
145.007	0.000805029	0.000808848	0.00569	0.00103	63.47	34.8716
146.762	0.000831764	0.000816653	0.00566	0.00101	63.9697	34.3917
148.535	0.000834919	0.000809513	0.00555	0.000994663	64.4659	33.9138
150.327	0.000841561	0.000840399	0.00548	0.000963445	64.9579	33.4387
152.135	0.000835251	0.000846377	0.00543	0.000974238	65.4453	32.9661
153.961	0.00083276	0.000827447	0.00535	0.000983039	65.9295	32.4954
155.806	0.000872613	0.000855178	0.0052	0.000977393	66.4087	32.0284
157.667	0.000845048	0.000865971	0.00515	0.000936378	66.884	31.564
159.547	0.000848369	0.0008761	0.00512	0.000953481	67.3548	31.1026
161.444	0.000870787	0.000854513	0.00506	0.000953647	67.8209	30.6454
163.359	0.000879753	0.00088872	0.00499	0.000922263	68.2821	30.1915
165.293	0.000891543	0.000872115	0.00486	0.000933389	68.7387	29.741
167.244	0.000893536	0.000880916	0.00484	0.000927909	69.1907	29.2939
169.213	0.000902835	0.000873443	0.00474	0.000903499	69.6381	28.8509
171.201	0.000901174	0.000893038	0.00465	0.000932393	70.0801	28.4122
173.206	0.000915953	0.00090599	0.00462	0.000928407	70.5172	27.9777
175.23	0.000909809	0.000908481	0.0045	0.000910473	70.9492	27.5478
177.272	0.000927245	0.0009123	0.00444	0.000916451	71.376	27.122
179.332	0.000928407	0.000922097	0.00442	0.000939201	71.7972	26.7009
181.409	0.000897853	0.000930732	0.00431	0.000918278	72.2134	26.2845
183.505	0.000930068	0.000939201	0.00419	0.000912466	72.6247	25.8724
185.618	0.00093123	0.000931894	0.00421	0.000936046	73.03	25.4656
187.748	0.000951157	0.000942024	0.00411	0.000947503	73.4302	25.0637
189.898	0.000941027	0.000936046	0.00402	0.000939367	73.8251	24.6663
192.066	0.000971747	0.000954312	0.00399	0.000940363	74.2141	24.2742
194.251	0.000953481	0.000968758	0.00392	0.000933887	74.5975	23.8879
196.454	0.000970585	0.000979552	0.00387	0.000936876	74.9752	23.5064
198.676	0.00096909	0.000974736	0.00381	0.000951489	75.3472	23.1302
200.915	0.000974736	0.000978888	0.00367	0.000928241	75.7139	22.7595
203.171	0.000975068	0.000969423	0.00369	0.000950492	76.0739	22.3943
205.445	0.000983537	0.000992836	0.00363	0.000964441	76.4287	22.0343
207.738	0.00099101	0.000980714	0.00355	0.000948002	76.778	21.6799
210.047	0.000978057	0.00097374	0.00352	0.000952817	77.1213	21.3314
212.374	0.000999478	0.000978223	0.00347	0.000979386	77.4594	20.9883
214.718	0.000996157	0.00101	0.00342	0.000947503	77.7913	20.6504
217.081	0.001	0.00101	0.00331	0.000978223	78.1184	20.3176
219.461	0.000995659	0.000997652	0.00327	0.000945013	78.4388	19.9913
221.858	0.001	0.000996655	0.00323	0.000978888	78.7536	19.6705
224.271	0.00102	0.00103	0.00324	0.000956802	79.0629	19.3549
226.702	0.001	0.00103	0.00316	0.000975401	79.3665	19.045
229.148	0.00104	0.00101	0.00311	0.00097291	79.6641	18.7412
231.612	0.00104	0.00102	0.00308	0.000995161	79.9569	18.4421
234.091	0.00105	0.00103	0.003	0.000999478	80.2433	18.1496
236.586	0.00102	0.00102	0.00291	0.000989847	80.524	17.8624
239.1	0.00104	0.00103	0.00289	0.000998648	80.7992	17.5807
241.631	0.00106	0.00102	0.00284	0.000994829	81.0692	17.3044
244.176	0.00104	0.00106	0.00284	0.00103	81.3337	17.0333
246.735	0.00104	0.00106	0.00279	0.00101	81.5924	16.7681
249.311	0.00105	0.00104	0.00271	0.00101	81.8459	16.5086
251.903	0.00106	0.00108	0.00269	0.00104	82.0943	16.2541
254.51	0.00105	0.00107	0.00263	0.00103	82.3374	16.005
257.132	0.00106	0.00105	0.00255	0.000990511	82.5751	15.7615
259.772	0.00108	0.00107	0.00257	0.000999312	82.808	15.5232
262.427	0.00107	0.00106	0.00253	0.00104	83.0352	15.2895
265.094	0.00106	0.00107	0.00246	0.00102	83.2572	15.0616
267.778	0.00105	0.00107	0.00247	0.00105	83.4749	14.8384
270.475	0.00109	0.00106	0.00241	0.00103	83.6871	14.6207
273.185	0.0011	0.00109	0.00236	0.00103	83.8939	14.4082
275.911	0.00106	0.00107	0.00235	0.00105	84.0965	14.2002
278.647	0.00107	0.00106	0.00231	0.00104	84.2937	13.9976
281.399	0.00109	0.00108	0.00224	0.00105	84.4865	13.7995
284.165	0.00108	0.00107	0.00225	0.00103	84.6748	13.6062
286.942	0.00108	0.00109	0.00221	0.00107	84.8585	13.4175
289.735	0.00108	0.0011	0.00218	0.00105	85.0378	13.2329
292.54	0.00109	0.0011	0.00216	0.00105	85.2126	13.0534
295.354	0.0011	0.0011	0.00212	0.00106	85.383	12.8783
298.182	0.00108	0.0011	0.00208	0.00108	85.5491	12.7075
301.021	0.0011	0.00111	0.00207	0.0011	85.7114	12.5406
303.875	0.0011	0.0011	0.00201	0.00109	85.8689	12.3788
306.74	0.0011	0.00109	0.00198	0.00108	86.0226	12.2205
309.615	0.0011	0.0011	0.00201	0.00106	86.1726	12.0662
312.5	0.00108	0.0011	0.00197	0.00107	86.3175	11.9167
315.398	0.00109	0.0011	0.00192	0.00109	86.4596	11.7706
318.309	0.00109	0.0011	0.00193	0.00111	86.5972	11.6292
321.229	0.00109	0.00111	0.0019	0.00108	86.7316	11.4911
324.16	0.00113	0.00112	0.00189	0.0011	86.8615	11.3572
327.1	0.0011	0.00112	0.00183	0.00111	86.9882	11.227
330.048	0.00112	0.00112	0.00181	0.00109	87.1115	11.1005
333.01	0.00113	0.00111	0.00182	0.00109	87.2317	10.9771
335.98	0.00111	0.00114	0.00179	0.0011	87.3488	10.857
338.959	0.00114	0.00111	0.00175	0.0011	87.462	10.7405
341.948	0.00114	0.00111	0.00176	0.0011	87.5724	10.6273
344.944	0.00109	0.0011	0.00172	0.00112	87.6797	10.517
347.952	0.00114	0.00113	0.00171	0.00111	87.7836	10.41
350.968	0.0011	0.0011	0.00171	0.0011	87.8842	10.3062
353.99	0.00113	0.00113	0.00167	0.00113	87.982	10.205
357.019	0.00112	0.00114	0.00167	0.00113	88.0768	10.1075
360.059	0.00114	0.00114	0.00165	0.0011	88.1697	10.012
363.107	0.00112	0.0011	0.00167	0.00111	88.2598	9.91961
366.16	0.00113	0.00112	0.00163	0.00111	88.3474	9.82942
369.22	0.00116	0.00114	0.00158	0.00114	88.4322	9.7426
372.287	0.00114	0.00112	0.00161	0.00112	88.5142	9.65826
375.361	0.00117	0.00113	0.00158	0.00112	88.5932	9.57651
378.443	0.00113	0.00114	0.00156	0.00113	88.6707	9.49645
381.533	0.00113	0.00113	0.00158	0.00112	88.746	9.41905
384.627	0.00116	0.00113	0.00155	0.00114	88.8184	9.34435
387.728	0.00114	0.00114	0.00155	0.00111	88.8892	9.27156
390.835	0.00114	0.00117	0.00155	0.00115	88.9577	9.20101
393.949	0.00113	0.00115	0.00153	0.0011	89.024	9.13296
397.068	0.00113	0.00114	0.0015	0.00111	89.0881	9.0671
400.194	0.00117	0.00115	0.00149	0.00113	89.1502	9.0031
403.323	0.00115	0.00115	0.00147	0.00114	89.2104	8.94106
406.458	0.00113	0.00116	0.00148	0.00111	89.2691	8.8809
409.598	0.00115	0.00115	0.00147	0.00115	89.3255	8.82298
412.742	0.00115	0.00115	0.00146	0.00115	89.3805	8.76651
415.891	0.00114	0.00115	0.00143	0.00113	89.4337	8.71216
419.044	0.00115	0.00117	0.00143	0.00111	89.4844	8.65984
422.207	0.00116	0.00113	0.00144	0.00117	89.5346	8.60815
425.373	0.00114	0.00113	0.00141	0.00114	89.5836	8.55782
428.544	0.00115	0.00115	0.00142	0.00116	89.6304	8.51009
431.715	0.00116	0.00115	0.0014	0.00115	89.6751	8.46367
434.889	0.00114	0.00116	0.0014	0.00112	89.7185	8.41917
438.068	0.00117	0.00114	0.00139	0.00113	89.7606	8.37556
441.256	0.00116	0.00113	0.00137	0.00117	89.8016	8.33332
444.448	0.00115	0.00113	0.00138	0.00115	89.8415	8.29221
447.638	0.00114	0.00115	0.00135	0.00116	89.8797	8.25264
450.832	0.00116	0.00113	0.00137	0.00113	89.9165	8.21473
454.029	0.00117	0.00116	0.00139	0.00114	89.9526	8.17792
457.234	0.00116	0.00115	0.00136	0.00114	89.9874	8.14193
460.439	0.00116	0.00116	0.00134	0.00114	90.0212	8.10677
463.649	0.00114	0.00115	0.00133	0.00114	90.0543	8.0728
466.862	0.00118	0.00114	0.00135	0.00114	90.0853	8.04069
470.077	0.00117	0.00116	0.00132	0.00115	90.1159	8.00866
473.297	0.00118	0.00115	0.00133	0.00115	90.1455	7.97832
476.516	0.00114	0.00118	0.00131	0.00117	90.1736	7.94928
479.742	0.00115	0.00114	0.00131	0.00116	90.2017	7.92055
482.968	0.00114	0.00113	0.0013	0.00114	90.2284	7.89314
486.196	0.00115	0.00114	0.00131	0.00116	90.2539	7.8669
489.429	0.00115	0.00116	0.00131	0.00115	90.2793	7.84077
492.661	0.00114	0.00115	0.00131	0.00116	90.3039	7.81576
495.897	0.00117	0.00115	0.00129	0.00118	90.3275	7.79199
499.132	0.00114	0.00114	0.00127	0.00113	90.3504	7.76879
502.374	0.00114	0.00118	0.00131	0.00115	90.3721	7.74643
505.616	0.00115	0.00114	0.00128	0.00115	90.3929	7.72434
508.86	0.00117	0.00113	0.00127	0.00117	90.4131	7.70325
512.105	0.00116	0.0012	0.00125	0.00114	90.4325	7.68296
515.353	0.00117	0.00114	0.00126	0.00116	90.4519	7.66331
518.602	0.00116	0.00115	0.00129	0.00119	90.4702	7.64412
521.854	0.00116	0.00114	0.00129	0.00114	90.488	7.62578
525.104	0.00114	0.00118	0.00127	0.00116	90.5045	7.60882
528.361	0.00118	0.00115	0.00125	0.00114	90.5214	7.59139
531.617	0.00118	0.00116	0.00125	0.00114	90.537	7.57526
534.87	0.00115	0.00115	0.00126	0.00114	90.5525	7.55902
538.131	0.00117	0.00117	0.00126	0.00117	90.5676	7.5441
541.39	0.00116	0.00115	0.00122	0.00115	90.5821	7.5293
544.652	0.00116	0.00117	0.00123	0.00115	90.596	7.5149
547.916	0.00113	0.00115	0.00126	0.00118	90.6094	7.50128
551.18	0.00115	0.00116	0.00125	0.00116	90.6224	7.48791
554.445	0.00117	0.00116	0.00124	0.00116	90.6352	7.47467
557.711	0.00115	0.00116	0.00124	0.00117	90.6479	7.46219
560.98	0.00116	0.00117	0.00121	0.00114	90.6598	7.4499
564.251	0.00118	0.00114	0.00121	0.00118	90.6712	7.43816
567.523	0.00117	0.00116	0.00123	0.00119	90.6818	7.42714
570.796	0.00115	0.00116	0.00123	0.00116	90.6922	7.41629
574.067	0.00112	0.00117	0.00124	0.00117	90.7022	7.40614
577.339	0.00118	0.00116	0.00123	0.00118	90.7118	7.39645
580.612	0.00116	0.00115	0.00119	0.00116	90.721	7.3869
583.889	0.00117	0.00113	0.00123	0.00116	90.7306	7.37745
587.165	0.00115	0.00117	0.00123	0.00116	90.7391	7.36842
590.444	0.00116	0.00117	0.00122	0.00115	90.7477	7.35959
593.724	0.00115	0.00117	0.00122	0.00114	90.756	7.35062
597.006	0.00117	0.00116	0.00124	0.00119	90.7645	7.34237
600.284	0.00117	0.00115	0.00122	0.00114	90.7723	7.33384
603.565	0.00116	0.00118	0.00124	0.00115	90.7803	7.32584
606.844	0.00118	0.00116	0.00121	0.00117	90.7869	7.31869
610.124	0.0012	0.00116	0.00121	0.00117	90.7939	7.31135
613.406	0.00115	0.00116	0.0012	0.00114	90.801	7.30439
616.691	0.00115	0.00117	0.00122	0.00116	90.8077	7.29724
619.977	0.00117	0.00117	0.00121	0.00117	90.8142	7.29062
623.261	0.00117	0.00117	0.00121	0.00116	90.8198	7.2846
626.546	0.00113	0.00118	0.00122	0.00116	90.8258	7.27835
629.831	0.00118	0.00117	0.00118	0.00118	90.8309	7.27284
633.117	0.00115	0.00117	0.00122	0.00115	90.8363	7.26696
636.403	0.00115	0.00117	0.00122	0.00116	90.8415	7.26171
639.692	0.00119	0.00117	0.00119	0.00118	90.8467	7.25628
642.978	0.00116	0.00116	0.0012	0.00117	90.8517	7.25122
646.265	0.00116	0.00118	0.00121	0.00115	90.8565	7.24622
649.553	0.00117	0.00117	0.0012	0.00116	90.8616	7.24135
652.844	0.00117	0.00117	0.00122	0.00118	90.8661	7.23672
656.137	0.00114	0.00116	0.0012	0.00115	90.8704	7.23244
659.426	0.00119	0.00117	0.00121	0.00118	90.8741	7.22883
662.714	0.00117	0.00115	0.00121	0.00116	90.878	7.2249
666.004	0.00118	0.00116	0.00119	0.00117	90.8821	7.22072
669.294	0.00115	0.00118	0.00121	0.00115	90.8862	7.21655
672.584	0.00116	0.00117	0.00117	0.00116	90.8899	7.21216
675.874	0.00116	0.00117	0.00124	0.00117	90.8934	7.20813
679.163	0.00115	0.00116	0.0012	0.00116	90.8964	7.20521
682.455	0.00114	0.00119	0.0012	0.00118	90.8993	7.20218
685.748	0.00117	0.00116	0.00118	0.00117	90.9024	7.19901
689.038	0.0012	0.00115	0.00118	0.00118	90.9056	7.19576
692.331	0.00117	0.00116	0.00117	0.00115	90.9088	7.19284
695.625	0.00116	0.00118	0.00119	0.00118	90.9118	7.18979
698.922	0.00117	0.00115	0.00119	0.00114	90.9147	7.18687
702.215	0.00118	0.00115	0.00118	0.00116	90.9167	7.18448
705.51	0.00116	0.00118	0.00121	0.00117	90.9193	7.18182
708.804	0.00116	0.00118	0.00119	0.00116	90.9218	7.17917
712.094	0.0012	0.00116	0.00119	0.00118	90.9243	7.17688
715.39	0.00119	0.00115	0.00118	0.00117	90.9266	7.17444
718.684	0.00114	0.00115	0.00119	0.00117	90.9284	7.17246
721.98	0.00114	0.00118	0.00119	0.00119	90.9306	7.17054
725.276	0.00117	0.00119	0.0012	0.00116	90.9324	7.16854
728.572	0.00117	0.00116	0.00119	0.00116	90.9344	7.1665
731.868	0.00118	0.00116	0.00117	0.00116	90.9365	7.16429
735.162	0.00118	0.00116	0.00119	0.00116	90.9384	7.16211
738.455	0.00117	0.00116	0.00118	0.00117	90.9402	7.16019
741.755	0.00114	0.00115	0.00117	0.00117	90.9417	7.15858
745.049	0.00115	0.00117	0.00117	0.00116	90.9429	7.15682
748.345	0.00117	0.00115	0.0012	0.00116	90.9444	7.15562
751.638	0.00116	0.00114	0.00117	0.00118	90.946	7.15457
754.932	0.00116	0.00117	0.00118	0.00115	90.9472	7.15318
758.229	0.00114	0.00118	0.00119	0.00117	90.9494	7.15168
761.527	0.00118	0.00117	0.00119	0.00116	90.9505	7.15049
764.822	0.00115	0.00117	0.00116	0.00117	90.952	7.1487
768.121	0.00114	0.00117	0.00119	0.00118	90.9534	7.14762
771.418	0.00115	0.00116	0.0012	0.00116	90.9546	7.14629
774.719	0.00115	0.00115	0.00117	0.00116	90.956	7.14502
778.017	0.00117	0.00118	0.00118	0.00117	90.9567	7.14418
781.314	0.00115	0.00117	0.00118	0.00117	90.958	7.14283
784.612	0.00117	0.00116	0.00118	0.00115	90.959	7.1415
787.911	0.00116	0.00114	0.00119	0.00117	90.9606	7.13994
791.207	0.00117	0.00114	0.00118	0.00116	90.9617	7.13917
794.505	0.00116	0.00115	0.00116	0.00118	90.9629	7.13793
797.802	0.00114	0.00119	0.00119	0.00116	90.9639	7.13668
801.098	0.00116	0.00117	0.00118	0.00118	90.9648	7.13577
804.396	0.00117	0.00117	0.00116	0.00118	90.9658	7.13476
807.697	0.00115	0.00116	0.00118	0.00117	90.9669	7.1338
810.995	0.00118	0.00115	0.00117	0.00116	90.9677	7.13301
814.296	0.00117	0.00115	0.0012	0.00117	90.9682	7.13201
817.593	0.00116	0.00115	0.00117	0.00118	90.9686	7.13133
820.891	0.00118	0.00116	0.00119	0.00118	90.9692	7.13017
824.187	0.00117	0.00118	0.00117	0.00115	90.9695	7.12951
827.487	0.00117	0.00117	0.0012	0.00118	90.9702	7.1288
830.784	0.00115	0.00118	0.00118	0.00118	90.971	7.12799
834.081	0.00118	0.00115	0.00118	0.00115	90.9719	7.12741
837.382	0.00118	0.00118	0.00117	0.00113	90.9727	7.12704
840.68	0.00116	0.00119	0.00119	0.00116	90.9734	7.12595
843.979	0.00115	0.00117	0.00115	0.00117	90.9739	7.12545
847.278	0.00117	0.00116	0.0012	0.00116	90.9743	7.12477
850.575	0.00117	0.00116	0.00118	0.00119	90.9744	7.12472
853.874	0.00117	0.00116	0.00118	0.00117	90.9746	7.12416
857.174	0.00115	0.00116	0.00118	0.00115	90.9745	7.1245
860.476	0.00121	0.00117	0.00118	0.00118	90.9749	7.12409
863.774	0.00116	0.00118	0.00118	0.00116	90.9757	7.12384
867.072	0.00117	0.00119	0.00118	0.00115	90.9762	7.12306
870.373	0.00119	0.00118	0.00119	0.00115	90.9768	7.12262
873.674	0.00114	0.00113	0.00114	0.00114	90.9781	7.12174
876.975	0.00117	0.00117	0.0012	0.00118	90.9787	7.12136
880.278	0.00116	0.00115	0.0012	0.00117	90.9796	7.12122
883.58	0.00117	0.00115	0.0012	0.00117	90.9801	7.12052
886.88	0.00114	0.00117	0.00119	0.00116	90.9804	7.1198
890.179	0.00116	0.00117	0.00117	0.00116	90.9806	7.11909
893.48	0.00118	0.00116	0.00117	0.00116	90.9811	7.11861
896.777	0.00117	0.00118	0.00116	0.00118	90.9812	7.1183
900.078	0.00117	0.00119	0.00118	0.00117	90.9814	7.11777
903.379	0.00117	0.00118	0.00119	0.00117	90.9812	7.118
906.678	0.00116	0.00114	0.00117	0.00116	90.9818	7.11788
909.977	0.00117	0.00117	0.00118	0.00116	90.9817	7.11767
913.278	0.00117	0.00119	0.00118	0.00117	90.982	7.11794
916.576	0.00117	0.00118	0.00116	0.00115	90.9815	7.11823
919.876	0.00116	0.00117	0.00119	0.00118	90.9821	7.11785
923.177	0.00115	0.00117	0.00119	0.00116	90.9826	7.1176
926.478	0.00117	0.0012	0.00117	0.00119	90.9826	7.11704
929.777	0.00116	0.00117	0.00118	0.00116	90.9824	7.11681
933.077	0.00118	0.00117	0.00119	0.00117	90.9828	7.11632
936.376	0.00116	0.00117	0.00118	0.00115	90.9829	7.11616
939.678	0.00119	0.00117	0.00117	0.00118	90.9835	7.1157
942.977	0.00117	0.00117	0.0012	0.0012	90.9838	7.1155
946.278	0.00116	0.00119	0.00118	0.00117	90.9843	7.11542
949.578	0.00114	0.00117	0.00118	0.00118	90.9851	7.11471
952.879	0.00118	0.00115	0.00115	0.00115	90.985	7.11487
956.183	0.00116	0.00116	0.00116	0.00117	90.9851	7.11472
959.48	0.00116	0.00118	0.00117	0.00119	90.9856	7.11401
962.781	0.00118	0.00117	0.00118	0.00117	90.9857	7.11425
966.083	0.00116	0.00119	0.00117	0.00115	90.9858	7.11431
969.384	0.00116	0.00117	0.00116	0.00115	90.9858	7.11396
972.688	0.00116	0.00118	0.0012	0.00121	90.9863	7.11344
975.989	0.00117	0.00119	0.00117	0.00118	90.986	7.11387
979.286	0.00115	0.00117	0.00119	0.00116	90.986	7.11354
982.588	0.00117	0.00115	0.00117	0.00119	90.9863	7.11326
985.888	0.00117	0.00117	0.00117	0.00117	90.9861	7.11337
989.191	0.00115	0.00116	0.00115	0.00116	90.9869	7.11309
992.493	0.00113	0.00118	0.00118	0.00114	90.9874	7.11253
995.795	0.00117	0.00117	0.0012	0.00119	90.9881	7.11219
999.097	0.00115	0.00116	0.0012	0.00118	90.9882	7.11213
1002.4	0.00117	0.00117	0.00116	0.00117	90.9884	7.11167
1005.7	0.00116	0.00118	0.0012	0.00116	90.9887	7.11102
1009	0.00118	0.00116	0.00119	0.00117	90.9891	7.11045
1012.3	0.00116	0.0012	0.0012	0.00118	90.9894	7.11026
1015.6	0.00116	0.00116	0.00119	0.00116	90.9896	7.10993
1018.9	0.00115	0.00118	0.00118	0.00116	90.9894	7.11005
1022.21	0.00119	0.00115	0.00119	0.00117	90.9892	7.11009
1025.51	0.00119	0.00115	0.00119	0.00113	90.9891	7.11028
1028.81	0.00117	0.00117	0.00119	0.00116	90.9892	7.11005
1032.12	0.00117	0.00115	0.00118	0.00114	90.9896	7.10983
1035.42	0.00115	0.00117	0.00118	0.00118	90.9893	7.10986
1038.72	0.00117	0.00117	0.00118	0.00119	90.9893	7.10992
1042.02	0.00116	0.00113	0.00116	0.00117	90.9888	7.11029
1045.32	0.00116	0.00117	0.00115	0.00116	90.9883	7.1102
1048.62	0.0012	0.00116	0.00116	0.00117	90.9887	7.1103
1051.92	0.00119	0.00119	0.00119	0.00118	90.9888	7.10993
1055.23	0.00116	0.00119	0.00119	0.00116	90.9892	7.10969
1058.52	0.00117	0.00117	0.0012	0.00117	90.989	7.10971
1061.83	0.00114	0.00117	0.00118	0.00117	90.9895	7.10931
1065.13	0.00116	0.00115	0.00117	0.00117	90.9891	7.10959
1068.43	0.00118	0.00118	0.00119	0.00115	90.9894	7.10918
1071.73	0.00119	0.00117	0.00119	0.00115	90.9894	7.10923
1075.03	0.00115	0.00117	0.00114	0.00116	90.9894	7.10944
1078.33	0.00117	0.00117	0.00118	0.00116	90.9889	7.10973
1081.63	0.00117	0.00114	0.00118	0.00117	90.9893	7.10943
1084.93	0.00117	0.00115	0.00116	0.00115	90.9894	7.10971
1088.24	0.00118	0.00116	0.00118	0.00116	90.9896	7.10922
1091.54	0.00117	0.00116	0.00118	0.00117	90.9898	7.10893
1094.84	0.00115	0.00117	0.00115	0.00118	90.99	7.10909
1098.14	0.00114	0.00119	0.00116	0.00116	90.9901	7.10848
1101.45	0.00118	0.00116	0.00116	0.00116	90.991	7.10798
1104.74	0.00118	0.00118	0.00119	0.00118	90.9902	7.10804
1108.04	0.00116	0.00116	0.00119	0.00116	90.9901	7.10822
1111.34	0.00116	0.00114	0.00117	0.00117	90.9897	7.10851
1114.65	0.00114	0.00114	0.00118	0.00117	90.99	7.1086
1117.95	0.00117	0.00117	0.00116	0.00118	90.9896	7.10909
1121.25	0.00118	0.00117	0.00117	0.00116	90.9895	7.10953
1124.54	0.00116	0.00116	0.00119	0.00115	90.9895	7.10955
1127.84	0.00116	0.00118	0.00118	0.00117	90.9892	7.10925
1131.14	0.00117	0.00118	0.00118	0.00118	90.9892	7.10945
1134.44	0.00117	0.00118	0.00117	0.00116	90.9894	7.10937
1137.74	0.00118	0.00116	0.00117	0.00119	90.9896	7.10944
1141.04	0.00116	0.00117	0.00117	0.00116	90.9898	7.10963
1144.34	0.00117	0.00117	0.00117	0.00118	90.9898	7.10925
1147.65	0.00116	0.00116	0.00118	0.00115	90.9898	7.10938
1150.94	0.00114	0.00118	0.00118	0.00116	90.9896	7.10937
1154.24	0.00118	0.00115	0.00119	0.0012	90.9895	7.10942
1157.54	0.00114	0.00118	0.00119	0.00117	90.9893	7.10937
1160.84	0.00115	0.00117	0.00118	0.00117	90.9893	7.10957
1164.14	0.00116	0.00117	0.00119	0.00116	90.9892	7.10988
1167.45	0.00114	0.00115	0.00118	0.00114	90.989	7.11002
1170.75	0.00115	0.00118	0.0012	0.00119	90.9891	7.11014
1174.05	0.00115	0.00114	0.00118	0.00119	90.9891	7.11044
1177.35	0.00116	0.00118	0.00119	0.00117	90.9891	7.11083
1180.65	0.00118	0.00116	0.00115	0.00116	90.9887	7.11095
1183.95	0.00114	0.00114	0.00115	0.00116	90.9892	7.11058
1187.25	0.00116	0.00117	0.00119	0.00114	90.989	7.11062
1190.55	0.00115	0.00114	0.00115	0.00115	90.9892	7.11069
1193.85	0.00114	0.00118	0.00117	0.00118	90.989	7.11091
1197.15	0.00116	0.00116	0.00118	0.00115	90.9896	7.11079
1200	0.00115	0.00118	0.00117	0.00117	90.9896	7.11094
1200	0.00115	0.00118	0.00117	0.00117	90.9896	7.11094
1229.48	1.99064	0.00118	1.75443	1.24004	89.0001	5.35768
1270.83	4.70921	0.00118	3.50975	1.74776	86.2815	3.60235
1324.52	8.11289	0.00118	4.9609	1.87456	82.8779	2.15121
1389.8	12.0735	0.00118	5.96247	1.89396	78.9172	1.14964
1465.99	16.4572	0.00118	6.55858	1.89582	74.5336	0.55353
1552.26	21.1269	0.00118	6.87036	1.89595	69.8639	0.24175
1647.92	25.9632	0.00118	7.01564	1.89596	65.0275	0.09647
1752.83	30.8835	0.00118	7.07691	1.89596	60.1072	0.03519
1867.62	35.8417	0.00118	7.10043	1.89596	55.1491	0.01168
1993.67	40.8151	0.00118	7.10864	1.89596	50.1757	0.00347
2133.04	45.7941	0.00118	7.11119	1.89596	45.1966	0.00091778
2288.7	50.775	0.00118	7.1119	1.89596	40.2157	0.00020873
2400	53.9952	0.00118	7.11204	1.89596	36.9955	6.62555e-05

## Sheet: Fig 2d
time	dye+cat2OH2	dye+cat3OH2	dye+cat3OOH	dye+cat4O
s	percent	percent	percent	percent
0	0	0	0	0
0.000169938	1.66054e-07	0.00496	0	0
0.000340247	8.30269e-07	0.01967	0	0
0.000510859	1.32843e-06	0.04397	0	0
0.000681856	6.64216e-07	0.07783	0	0
0.000853262	8.30269e-07	0.12101	0	0
0.00103	1.49448e-06	0.17338	0	0
0.0012	3.32108e-07	0.23484	0	0
0.00137	6.64216e-07	0.30523	0	0
0.00154	9.96323e-07	0.38457	0	0
0.00172	8.30269e-07	0.47261	0	0
0.00189	8.30269e-07	0.56944	0	0
0.00206	6.64216e-07	0.67482	0	0
0.00224	8.30269e-07	0.7887	0	0
0.00241	4.98162e-07	0.9108	0	0
0.00259	6.64216e-07	1.04111	0	0
0.00277	8.30269e-07	1.17989	0	0
0.00294	6.64216e-07	1.32664	0	0
0.00312	6.64216e-07	1.48147	0	0
0.0033	6.64216e-07	1.64392	0	0
0.00348	1.32843e-06	1.81383	0	0
0.00366	3.32108e-07	1.99181	0	0
0.00384	4.98162e-07	2.17754	0	0
0.00402	4.98162e-07	2.37083	0	0
0.0042	8.30269e-07	2.57129	0	0
0.00438	4.98162e-07	2.77937	0	0
0.00456	0	2.99442	0	0
0.00475	6.64216e-07	3.21689	0	0
0.00493	0	3.44655	0	0
0.00511	6.64216e-07	3.6831	0	0
0.0053	1.66054e-07	3.92673	0	0
0.00548	8.30269e-07	4.17714	0	0
0.00567	6.64216e-07	4.4345	0	0
0.00586	6.64216e-07	4.69886	0	0
0.00605	1.16238e-06	4.96952	0	0
0.00624	3.32108e-07	5.24712	0	0
0.00643	3.32108e-07	5.53088	0	0
0.00662	3.32108e-07	5.82196	0	0
0.00681	3.32108e-07	6.11932	0	0
0.007	4.98162e-07	6.42319	0	0
0.00719	3.32108e-07	6.73338	0	0
0.00739	1.66054e-07	7.04994	0	0
0.00758	0	7.37277	0	0
0.00778	4.98162e-07	7.70199	0	0
0.00797	3.32108e-07	8.03675	0	0
0.00817	8.30269e-07	8.37757	0	0
0.00837	3.32108e-07	8.72441	0	0
0.00857	3.32108e-07	9.07769	0	0
0.00877	4.98162e-07	9.43694	0	0
0.00897	1.66054e-07	9.80165	0	0
0.00917	1.66054e-07	10.1726	0	0
0.00938	6.64216e-07	10.549	0	0
0.00958	1.66054e-07	10.9309	0	0
0.00979	1.66054e-07	11.3189	0	0
0.00999	6.64216e-07	11.7124	0	0
0.0102	8.30269e-07	12.1117	0	0
0.01041	4.98162e-07	12.5161	0	0
0.01062	9.96323e-07	12.9263	0	0
0.01083	9.96323e-07	13.3422	0	0
0.01105	4.98162e-07	13.7629	0	0
0.01126	1.66054e-07	14.1893	0	0
0.01148	6.64216e-07	14.621	0	0
0.01169	6.64216e-07	15.0578	0	0
0.01191	1.66054e-07	15.5001	0	0
0.01213	1.66054e-07	15.9475	0	0
0.01235	6.64216e-07	16.4005	0	0
0.01257	3.32108e-07	16.8583	0	0
0.0128	1.66054e-07	17.3212	0	0
0.01302	1.66054e-07	17.7897	0	0
0.01325	3.32108e-07	18.263	0	0
0.01348	1.66054e-07	18.7415	0	0
0.01371	4.98162e-07	19.225	0	0
0.01394	1.66054e-07	19.7134	0	0
0.01417	3.32108e-07	20.2068	0	0
0.01441	1.66054e-07	20.705	0	0
0.01464	4.98162e-07	21.2082	0	0
0.01488	1.66054e-07	21.7157	0	0
0.01512	6.64216e-07	22.2282	0	0
0.01536	1.66054e-07	22.7452	0	0
0.01561	4.98162e-07	23.2672	0	0
0.01585	4.98162e-07	23.794	0	0
0.0161	1.66054e-07	24.3258	0	0
0.01635	1.66054e-07	24.8618	0	0
0.0166	1.66054e-07	25.4027	0	0
0.01685	3.32108e-07	25.9483	0	0
0.01711	1.66054e-07	26.4986	0	0
0.01737	3.32108e-07	27.054	0	0
0.01763	4.98162e-07	27.6135	0	0
0.01789	1.66054e-07	28.1779	0	0
0.01815	6.64216e-07	28.7461	0	0
0.01842	3.32108e-07	29.3193	0	0
0.01869	6.64216e-07	29.8968	0	0
0.01896	1.66054e-07	30.4788	0	0
0.01923	0	31.0653	0	0
0.01951	6.64216e-07	31.6564	0	0
0.01979	1.66054e-07	32.252	0	0
0.02007	0	32.8509	0	0
0.02036	1.66054e-07	33.4549	0	0
0.02064	0	34.0633	0	0
0.02093	1.66054e-07	34.6758	0	0
0.02123	0	35.2927	0	0
0.02152	9.96323e-07	35.9137	0	0
0.02182	0	36.5391	0	0
0.02213	0	37.1691	0	0
0.02243	4.98162e-07	37.8032	0	0
0.02274	1.66054e-07	38.4414	0	0
0.02306	3.32108e-07	39.0842	0	0
0.02337	0	39.7308	0	0
0.02369	3.32108e-07	40.382	0	0
0.02402	6.64216e-07	41.0372	0	0
0.02434	1.66054e-07	41.6967	0	0
0.02468	0	42.3602	0	0
0.02501	1.66054e-07	43.0278	0	0
0.02535	1.66054e-07	43.6992	0	0
0.0257	1.66054e-07	44.3754	0	0
0.02605	0	45.0555	0	0
0.0264	1.66054e-07	45.7397	0	0
0.02676	1.66054e-07	46.4282	0	0
0.02712	1.66054e-07	47.1205	0	0
0.02749	3.32108e-07	47.8169	0	0
0.02786	1.66054e-07	48.5176	0	0
0.02824	0	49.2224	0	0
0.02863	0	49.9316	0	0
0.02902	4.98162e-07	50.6445	0	0
0.02941	3.32108e-07	51.3615	0	0
0.02982	0	52.0825	0	0
0.03022	1.66054e-07	52.8076	0	0
0.03064	0	53.5366	0	0
0.03106	1.66054e-07	54.2699	0	0
0.03149	3.32108e-07	55.0073	0	0
0.03193	3.32108e-07	55.7488	0	0
0.03237	1.66054e-07	56.4945	0	0
0.03283	0	57.244	0	0
0.03329	1.66054e-07	57.9975	0	0
0.03376	3.32108e-07	58.755	0	0
0.03424	0	59.5166	0	0
0.03473	0	60.2823	0	0
0.03522	0	61.052	0	0
0.03573	1.66054e-07	61.8263	0	0
0.03625	1.66054e-07	62.6046	0	0
0.03678	1.66054e-07	63.387	0	0
0.03733	0	64.1738	0	0
0.03788	3.32108e-07	64.9645	0	0
0.03845	3.32108e-07	65.7598	0	0
0.03903	4.98162e-07	66.5583	0	0
0.03963	6.64216e-07	67.3612	0	0
0.04024	0	68.1684	0	0
0.04087	0	68.9796	0	0
0.04152	0	69.7953	0	0
0.04218	0	70.6151	0	0
0.04286	0	71.4396	0	0
0.04357	0	72.2682	0	0
0.04429	3.32108e-07	73.101	0	0
0.04504	1.66054e-07	73.9384	0	0
0.04582	0	74.78	0	0
0.04662	0	75.6266	0	0
0.04745	0	76.4774	0	0
0.04831	1.66054e-07	77.3324	0	0
0.04921	1.66054e-07	78.1925	0	0
0.05015	0	79.0567	0	0
0.05112	1.66054e-07	79.9255	0	0
0.05214	0	80.7992	0	0
0.0532	1.66054e-07	81.6776	0	0
0.05433	1.66054e-07	82.5605	0	0
0.05551	0	83.4487	0	0
0.05675	0	84.3416	0	0
0.05808	0	85.2397	0	0
0.05948	0	86.143	0	0
0.06099	0	87.0516	0	0
0.06261	0	87.9653	0	0
0.06435	1.66054e-07	88.8838	0	0
0.06626	1.66054e-07	89.8084	0	0
0.06835	0	90.7379	0	0
0.07066	0	91.6736	0	0
0.07327	0	92.6143	0	0
0.07624	0	93.5605	0	0
0.0797	0	94.5116	0	0
0.08385	1.66054e-07	95.4668	0	0
0.08904	0	96.4248	0	0
0.09599	0	97.3821	0	0
0.10651	0	98.3264	0	0
0.1284	0	99.2001	0	0
0.26177	0	99.1847	0	1.66054e-07
0.49385	0	98.3592	0	0
0.72757	0	97.535	0	0
0.96244	0	96.713	0	0
1.19911	0	95.8931	0	0
1.43708	0	95.0748	0	1.66054e-07
1.6766	0	94.2585	0	1.66054e-07
1.91772	0	93.444	0	0
2.16021	0	92.6318	0	0
2.4043	0	91.8213	0	0
2.64994	0	91.0129	0	0
2.89719	0	90.2066	0	0
3.14604	0	89.4021	0	1.66054e-07
3.39654	0	88.5997	0	0
3.64855	0	87.7994	0	0
3.90223	0	87.0009	0	0
4.15747	0	86.2048	0	0
4.4145	0	85.4107	0	0
4.67317	0	84.6188	0	0
4.93371	0	83.8292	0	0
5.19599	0	83.0416	0	0
5.45998	0	82.2564	0	0
5.72569	0	81.4731	0	0
5.99308	0	80.6921	0	0
6.26258	0	79.9134	0	0
6.53376	0	79.1371	0	0
6.80707	0	78.363	0	0
7.08227	0	77.591	0	0
7.35927	0	76.8215	0	0
7.63845	0	76.0543	0	0
7.91928	0	75.2897	0	0
8.20197	0	74.5272	0	0
8.48676	0	73.767	0	0
8.77346	0	73.0097	0	0
9.06248	0	72.2544	0	0
9.35354	0	71.5017	0	0
9.64653	0	70.7512	0	1.66054e-07
9.94178	0	70.0035	0	1.66054e-07
10.2393	0	69.2584	0	0
10.539	0	68.5159	0	0
10.8407	0	67.7757	0	0
11.1448	0	67.0382	0	0
11.4511	0	66.3036	0	0
11.7599	0	65.5715	0	0
12.0711	0	64.8422	0	0
12.3847	0	64.1153	0	0
12.7003	0	63.3914	0	0
13.0184	0	62.67	0	0
13.3388	0	61.9515	0	0
13.6619	0	61.2359	0	0
13.9874	0	60.5232	0	0
14.3157	0	59.8132	0	0
14.6465	0	59.1061	0	0
14.9796	0	58.4017	0	0
15.3158	0	57.7004	1.66054e-07	0
15.6543	0	57.0023	0	0
15.9957	0	56.3068	0	0
16.3398	0	55.6145	0	0
16.6866	0	54.9253	0	0
17.0363	0	54.239	0	0
17.389	0	53.5563	0	0
17.7445	0	52.8764	0	0
18.1029	0	52.1998	0	0
18.4642	0	51.5263	0	0
18.8289	0	50.8562	0	0
19.1961	0	50.1894	0	0
19.5665	0	49.5255	0	0
19.94	0	48.8653	0	0
20.317	0	48.2084	0	0
20.6973	0	47.555	0	0
21.0806	0	46.9047	0	0
21.4674	0	46.2578	0	0
21.8576	0	45.6144	0	0
22.2511	0	44.9747	0	0
22.6485	0	44.3386	0	0
23.0489	0	43.7056	0	0
23.453	0	43.076	0	0
23.8605	0	42.451	0	0
24.2717	0	41.8294	0	0
24.6867	0	41.2113	0	0
25.1052	0	40.5969	0	0
25.528	0	39.9864	0	0
25.9542	0	39.3799	0	0
26.3843	0	38.7769	0	0
26.8186	0	38.1778	0	0
27.2574	0	37.5828	0	0
27.7	0	36.9916	0	0
28.1468	0	36.4046	0	0
28.5978	0	35.8214	0	1.66054e-07
29.0529	0	35.2423	0	0
29.5125	0	34.6674	0	0
29.9762	0	34.0964	0	0
30.4445	0	33.5299	0	1.66054e-07
30.9172	0	32.9669	0	0
31.395	0	32.4087	0	0
31.8773	0	31.8545	0	0
32.3641	0	31.305	0	0
32.856	0	30.7598	0	0
33.3528	0	30.2192	0	0
33.8545	0	29.6827	0	0
34.3609	0	29.151	0	1.66054e-07
34.8731	0	28.6233	0	0
35.3904	0	28.1006	0	0
35.9128	0	27.5822	0	0
36.4405	0	27.0685	0	0
36.9737	0	26.5595	0	0
37.5122	0	26.0554	0	0
38.0563	0	25.5558	0	0
38.6061	0	25.061	0	0
39.1618	0	24.5709	0	0
39.7238	0	24.0856	0	1.66054e-07
40.2911	0	23.6048	0	0
40.8647	0	23.1296	0	0
41.4439	0	22.6588	0	1.66054e-07
42.0297	0	22.1932	0	0
42.6217	0	21.7325	0	0
43.2198	0	21.277	0	0
43.8242	0	20.8264	1.66054e-07	0
44.436	0	20.3809	1.66054e-07	0
45.0544	0	19.9404	0	1.66054e-07
45.6793	0	19.5054	0	0
46.3116	0	19.0757	0	0
46.9502	0	18.651	0	0
47.5962	0	18.2318	0	0
48.2495	0	17.8177	1.66054e-07	0
48.9099	0	17.4092	0	0
49.5773	0	17.0063	0	0
50.253	0	16.6087	0	0
50.9363	0	16.2166	0	0
51.6268	0	15.8295	0	0
52.325	0	15.448	0	0
53.0314	0	15.0723	1.66054e-07	0
53.7467	0	14.7016	0	0
54.4697	0	14.3368	0	0
55.2009	0	13.9771	1.66054e-07	0
55.9404	0	13.6232	0	0
56.6885	0	13.2752	0	0
57.4458	0	12.9323	0	0
58.2121	0	12.5955	0	0
58.987	0	12.2641	0	0
59.7712	0	11.9386	0	0
60.5643	0	11.6187	0	0
61.3668	0	11.304	0	0
62.1784	0	10.9954	0	0
62.9993	0	10.6922	0	0
63.8301	0	10.3948	0	0
64.6714	0	10.1031	0	0
65.5226	0	9.81715	0	0
66.3831	0	9.53702	0	0
67.2542	0	9.26279	0	0
68.136	0	8.9935	0	0
69.0277	0	8.73029	0	0
69.93	0	8.47244	0	0
70.8436	0	8.22047	0	0
71.7678	0	7.97394	0	0
72.7031	0	7.73338	0	0
73.6493	0	7.49832	0	0
74.6062	0	7.26852	1.66054e-07	0
75.5751	0	7.0446	0	0
76.5558	0	6.82608	0	0
77.5478	0	6.61281	0	0
78.5529	0	6.40539	0	0
79.5702	0	6.20308	0	0
80.5985	0	6.00646	0	0
81.6388	0	5.81496	0	0
82.6919	0	5.62902	0	0
83.7584	0	5.44782	0	0
84.8371	0	5.27217	0	0
85.9285	0	5.10131	1.66054e-07	0
87.0334	0	4.93548	0	0
88.1515	0	4.77534	1.66054e-07	0
89.2824	0	4.61993	0	1.66054e-07
90.4266	0	4.46951	0	0
91.584	0	4.32386	0	0
92.7563	0	4.1828	0	1.66054e-07
93.9401	0	4.04645	0	0
95.1397	0	3.91483	0	0
96.3516	0	3.78786	1.66054e-07	0
97.5792	0	3.66534	0	0
98.8208	0	3.54723	0	0
100.076	1.66054e-07	3.4337	0	0
101.347	0	3.32429	0	0
102.632	0	3.21947	0	0
103.932	1.66054e-07	3.11857	0	0
105.246	0	3.02207	1.66054e-07	0
106.577	0	2.92949	0	0
107.922	0	2.84087	0	0
109.282	0	2.75596	0	1.66054e-07
110.657	0	2.6744	1.66054e-07	0
112.048	0	2.59659	0	0
113.455	0	2.52271	0	0
114.877	0	2.45212	0	0
116.314	0	2.38498	0	0
117.767	0	2.32059	1.66054e-07	0
119.237	0	2.25976	1.66054e-07	0
120.723	0	2.20209	0	0
122.225	0	2.14748	0	0
123.743	0	2.09577	1.66054e-07	0
125.278	0	2.04711	0	0
126.829	0	2.001	0	0
128.397	0	1.95773	0	0
129.982	0	1.91642	0	0
131.583	0	1.87784	0	0
133.201	0	1.84183	0	0
134.835	0	1.80813	0	0
136.488	0	1.77666	0	0
138.157	0	1.74763	0	0
139.842	0	1.72033	1.66054e-07	0
141.548	0	1.69489	0	0
143.268	0	1.67158	0	0
145.007	0	1.6501	0	0
146.762	0	1.63032	0	0
148.535	0	1.61214	0	0
150.327	0	1.59534	1.66054e-07	0
152.135	0	1.58044	0	0
153.961	0	1.5671	0	0
155.806	0	1.55505	0	0
157.667	0	1.54415	0	0
159.547	0	1.53473	1.66054e-07	0
161.444	0	1.52604	0	0
163.359	0	1.5187	0	0
165.293	0	1.51279	0	0
167.244	0	1.50792	0	0
169.213	0	1.50351	0	0
171.201	0	1.50028	0	0
173.206	0	1.49768	0	0
175.23	0	1.49584	0	0
177.272	0	1.49482	0	0
179.332	0	1.49467	0	0
181.409	0	1.49503	0	0
183.505	0	1.49593	0	0
185.618	0	1.4974	0	0
187.748	0	1.49913	0	1.66054e-07
189.898	0	1.50175	0	0
192.066	0	1.50486	0	0
194.251	0	1.50786	0	0
196.454	0	1.51172	0	0
198.676	0	1.51587	0	0
200.915	0	1.52011	0	0
203.171	0	1.52524	0	0
205.445	0	1.53045	0	1.66054e-07
207.738	1.66054e-07	1.53561	0	0
210.047	0	1.54092	0	0
212.374	0	1.5459	0	0
214.718	0	1.5519	0	0
217.081	0	1.55769	1.66054e-07	0
219.461	0	1.56372	0	0
221.858	0	1.56972	0	0
224.271	0	1.57592	0	0
226.702	0	1.58237	0	0
229.148	0	1.58862	0	0
231.612	0	1.59481	0	0
234.091	0	1.60101	0	0
236.586	0	1.60758	0	0
239.1	0	1.61415	0	0
241.631	0	1.62043	0	0
244.176	0	1.62701	1.66054e-07	0
246.735	0	1.63355	0	0
249.311	0	1.63967	0	0
251.903	0	1.64569	1.66054e-07	0
254.51	0	1.65175	1.66054e-07	0
257.132	0	1.6577	0	0
259.772	0	1.66309	0	0
262.427	0	1.66951	0	0
265.094	0	1.67557	0	0
267.778	0	1.68108	0	0
270.475	0	1.68664	0	0
273.185	0	1.69232	0	0
275.911	0	1.69779	0	0
278.647	0	1.7033	0	0
281.399	0	1.7085	1.66054e-07	0
284.165	0	1.71364	0	0
286.942	0	1.7186	0	0
289.735	0	1.72394	0	0
292.54	0	1.7285	0	0
295.354	0	1.73332	0	0
298.182	0	1.73805	0	0
301.021	0	1.74254	0	0
303.875	0	1.74706	0	0
306.74	0	1.75173	0	0
309.615	0	1.75591	0	0
312.5	0	1.76055	0	0
315.398	0	1.76459	0	0
318.309	0	1.76838	0	0
321.229	0	1.77211	0	0
324.16	0	1.77603	0	0
327.1	0	1.77965	0	0
330.048	0	1.78287	0	0
333.01	0	1.78602	0	0
335.98	0	1.78908	0	0
338.959	0	1.79242	0	0
341.948	0	1.79509	0	0
344.944	0	1.79824	1.66054e-07	0
347.952	0	1.80132	0	0
350.968	0	1.80463	0	0
353.99	0	1.80794	0	1.66054e-07
357.019	0	1.8106	1.66054e-07	0
360.059	0	1.81329	0	0
363.107	0	1.81555	0	0
366.16	0	1.81813	0	0
369.22	0	1.82016	0	0
372.287	0	1.8226	0	0
375.361	1.66054e-07	1.82525	0	0
378.443	0	1.8279	0	0
381.533	0	1.82995	0	0
384.627	0	1.83228	1.66054e-07	0
387.728	0	1.83427	0	0
390.835	0	1.83631	0	0
393.949	0	1.83815	0	0
397.068	0	1.83994	0	0
400.194	0	1.84174	0	0
403.323	0	1.8436	0	0
406.458	0	1.84509	0	0
409.598	0	1.84659	0	0
412.742	0	1.84806	0	0
415.891	0	1.84932	0	0
419.044	0	1.85089	1.66054e-07	0
422.207	0	1.85234	0	0
425.373	0	1.85375	0	0
428.544	1.66054e-07	1.85459	0	0
431.715	0	1.85635	0	0
434.889	0	1.85756	0	0
438.068	0	1.859	0	0
441.256	0	1.86022	1.66054e-07	0
444.448	0	1.86151	0	0
447.638	0	1.86282	0	0
450.832	0	1.86403	0	0
454.029	0	1.86468	0	0
457.234	0	1.86587	0	0
460.439	0	1.86721	0	0
463.649	0	1.86812	0	0
466.862	0	1.86919	1.66054e-07	0
470.077	0	1.8706	0	0
473.297	0	1.8714	0	1.66054e-07
476.516	0	1.87234	0	0
479.742	0	1.87302	0	0
482.968	0	1.87378	0	1.66054e-07
486.196	0	1.87443	0	0
489.429	0	1.87514	0	0
492.661	0	1.87556	0	0
495.897	0	1.8757	0	0
499.132	1.66054e-07	1.87618	0	0
502.374	0	1.87673	0	0
505.616	0	1.87803	0	0
508.86	0	1.87894	0	0
512.105	0	1.87978	0	0
515.353	0	1.88005	0	0
518.602	0	1.8809	0	0
521.854	0	1.88147	0	0
525.104	0	1.8819	0	0
528.361	0	1.8825	0	0
531.617	0	1.883	0	0
534.87	0	1.88374	1.66054e-07	0
538.131	0	1.88355	0	0
541.39	0	1.88387	0	0
544.652	0	1.88443	0	0
547.916	0	1.88457	0	0
551.18	0	1.88493	0	0
554.445	0	1.88541	0	0
557.711	0	1.88517	0	0
560.98	0	1.88567	0	0
564.251	0	1.88592	0	0
567.523	0	1.88629	0	0
570.796	0	1.88679	0	0
574.067	0	1.88691	0	0
577.339	0	1.88704	0	0
580.612	0	1.88741	0	0
583.889	0	1.88727	0	0
587.165	0	1.88773	0	0
590.444	0	1.88803	0	0
593.724	0	1.88868	0	0
597.006	0	1.88835	1.66054e-07	0
600.284	0	1.88916	0	0
603.565	0	1.88911	0	0
606.844	0	1.88973	0	0
610.124	0	1.88999	0	0
613.406	0	1.89001	0	0
616.691	0	1.89038	1.66054e-07	0
619.977	0	1.89041	0	0
623.261	0	1.89086	0	0
626.546	0	1.89112	1.66054e-07	0
629.831	0	1.89158	1.66054e-07	0
633.117	1.66054e-07	1.89206	0	0
636.403	0	1.89209	0	0
639.692	0	1.89231	0	0
642.978	0	1.89235	1.66054e-07	0
646.265	0	1.8926	0	0
649.553	0	1.89231	0	0
652.844	0	1.89243	0	0
656.137	0	1.89254	0	0
659.426	0	1.89233	0	0
662.714	0	1.89245	0	0
666.004	0	1.89244	0	0
669.294	0	1.89261	1.66054e-07	0
672.584	0	1.89328	0	0
675.874	0	1.89371	0	0
679.163	0	1.89372	0	1.66054e-07
682.455	0	1.89381	0	0
685.748	0	1.89393	0	0
689.038	0	1.89394	0	0
692.331	0	1.89371	0	0
695.625	0	1.89368	0	0
698.922	0	1.89372	0	0
702.215	0	1.89411	0	0
705.51	0	1.89419	1.66054e-07	0
708.804	0	1.89436	0	0
712.094	1.66054e-07	1.89414	0	0
715.39	0	1.89421	0	0
718.684	0	1.89452	0	0
721.98	0	1.89419	0	0
725.276	0	1.89432	1.66054e-07	0
728.572	1.66054e-07	1.89443	0	0
731.868	0	1.89452	0	0
735.162	0	1.89476	0	0
738.455	0	1.8949	0	0
741.755	0	1.8951	0	0
745.049	0	1.89558	0	0
748.345	0	1.89531	1.66054e-07	0
751.638	0	1.89474	0	0
754.932	1.66054e-07	1.89495	0	0
758.229	0	1.89421	0	0
761.527	0	1.89429	0	0
764.822	0	1.89464	0	0
768.121	0	1.89432	0	0
771.418	0	1.89444	0	0
774.719	0	1.89438	0	0
778.017	1.66054e-07	1.8944	0	0
781.314	0	1.89447	1.66054e-07	0
784.612	0	1.89481	0	0
787.911	0	1.89484	0	0
791.207	0	1.89443	0	0
794.505	0	1.89454	0	0
797.802	0	1.89475	0	0
801.098	0	1.8947	0	0
804.396	0	1.89472	0	0
807.697	0	1.89463	0	0
810.995	0	1.89466	0	0
814.296	0	1.89505	0	0
817.593	0	1.89539	0	0
820.891	0	1.89593	0	0
824.187	0	1.8963	0	0
827.487	0	1.89632	0	0
830.784	0	1.8963	0	0
834.081	0	1.89605	0	0
837.382	0	1.89558	0	0
840.68	0	1.89591	0	0
843.979	0	1.896	0	0
847.278	0	1.89622	0	0
850.575	0	1.89615	0	0
853.874	0	1.89658	0	0
857.174	0	1.8964	0	0
860.476	0	1.89626	0	0
863.774	0	1.89575	0	0
867.072	0	1.89601	0	0
870.373	1.66054e-07	1.89588	0	0
873.674	0	1.89561	0	0
876.975	0	1.89526	0	0
880.278	0	1.89454	0	0
883.58	0	1.89474	0	0
886.88	0	1.8951	0	0
890.179	0	1.89565	0	0
893.48	0	1.89561	0	0
896.777	0	1.8958	0	0
900.078	0	1.89609	0	0
903.379	0	1.89606	0	0
906.678	0	1.89568	0	0
909.977	0	1.89589	0	0
913.278	0	1.89535	0	0
916.576	0	1.89562	0	0
919.876	0	1.89533	0	0
923.177	0	1.89515	0	0
926.478	0	1.8956	1.66054e-07	0
929.777	0	1.8961	0	0
933.077	1.66054e-07	1.8962	0	0
936.376	0	1.89627	0	0
939.678	1.66054e-07	1.8961	0	0
942.977	0	1.89599	0	0
946.278	0	1.89559	0	0
949.578	0	1.89554	0	0
952.879	0	1.89548	0	0
956.183	1.66054e-07	1.89552	0	0
959.48	0	1.8957	0	0
962.781	0	1.89538	0	0
966.083	1.66054e-07	1.89518	0	0
969.384	0	1.89563	0	0
972.688	0	1.89548	0	0
975.989	0	1.89545	0	0
979.286	0	1.89583	1.66054e-07	0
982.588	0	1.89577	0	0
985.888	0	1.89587	0	0
989.191	0	1.89538	0	0
992.493	0	1.89542	0	1.66054e-07
995.795	0	1.89503	0	0
999.097	0	1.89499	0	0
1002.4	0	1.89523	0	0
1005.7	0	1.89554	0	0
1009	0	1.89577	0	0
1012.3	0	1.89562	0	0
1015.6	0	1.89577	1.66054e-07	0
1018.9	0	1.89588	0	0
1022.21	0	1.896	0	0
1025.51	0	1.8959	0	0
1028.81	0	1.8961	0	0
1032.12	0	1.89593	0	0
1035.42	0	1.8962	0	0
1038.72	0	1.89611	0	0
1042.02	0	1.89626	0	0
1045.32	0	1.89685	0	0
1048.62	0	1.89629	0	0
1051.92	0	1.89647	1.66054e-07	0
1055.23	1.66054e-07	1.89645	0	0
1058.52	0	1.8966	0	0
1061.83	0	1.89652	0	0
1065.13	0	1.89663	0	0
1068.43	0	1.89675	0	0
1071.73	0	1.8967	0	0
1075.03	0	1.89659	0	0
1078.33	0	1.89666	0	0
1081.63	0	1.89658	0	0
1084.93	0	1.89625	0	1.66054e-07
1088.24	0	1.89647	1.66054e-07	0
1091.54	0	1.89657	0	0
1094.84	0	1.8963	0	0
1098.14	0	1.89674	0	0
1101.45	0	1.89635	0	0
1104.74	0	1.89703	0	1.66054e-07
1108.04	0	1.89696	0	0
1111.34	0	1.89712	0	0
1114.65	0	1.89682	0	0
1117.95	0	1.89663	0	0
1121.25	0	1.89628	0	0
1124.54	0	1.89631	0	0
1127.84	0	1.89685	0	0
1131.14	0	1.89661	0	0
1134.44	0	1.89655	0	0
1137.74	0	1.89625	0	0
1141.04	0	1.8959	0	0
1144.34	0	1.89623	0	0
1147.65	0	1.89621	0	0
1150.94	0	1.89637	0	0
1154.24	0	1.8964	0	0
1157.54	0	1.89669	1.66054e-07	0
1160.84	0	1.89644	0	0
1164.14	0	1.8962	0	0
1167.45	0	1.89633	0	0
1170.75	0	1.89606	0	0
1174.05	0	1.89584	0	0
1177.35	0	1.89536	0	0
1180.65	0	1.89573	1.66054e-07	0
1183.95	0	1.89563	0	0
1187.25	0	1.89568	0	0
1190.55	0	1.89546	0	0
1193.85	0	1.89543	0	0
1197.15	0	1.89499	1.66054e-07	0
1200	0	1.89479	0	0
1200	0	1.89479	0	0
1229.48	0	0.65591	0	0
1270.83	0	0.1482	0	0
1324.52	0	0.0214	0	0
1389.8	0	0.002	0	0
1465.99	0	0.000133175	0	0
1552.26	0	5.97794e-06	0	0
1647.92	0	0	0	0
1752.83	0	0	0	0
1867.62	0	0	0	0
1993.67	0	0	0	0
2133.04	0	0	0	0
2288.7	0	0	0	0
2400	0	0	0	0

## Sheet: Fig 3a,b
time	rad-NR	BET	total exc	total inj
s	per diad-s	per diad-s	per diad-s	per diad-s
0	0	0	0
0.000169938	0.000107486	0	117.163	58.5551
0.000340247	0.000195003	0	117.152	58.5411
0.000510859	0.000126527	0	117.148	58.5665
0.000681856	6.79764e-05	0	117.117	58.5407
0.000853262	0.000203443	0	117.038	58.4966
0.00103	0.000174018	9.66769e-06	117.012	58.4874
0.0012	0.000163937	0	116.909	58.458
0.00137	0.000163498	0	116.832	58.3995
0.00154	0.000163113	9.59491e-06	116.763	58.3575
0.00172	0.000201003	0	116.676	58.317
0.00189	0.000171903	0	116.573	58.295
0.00206	0.000161921	9.52479e-06	116.441	58.2333
0.00224	8.54995e-05	0	116.358	58.1745
0.00241	0.000160935	0	116.151	58.066
0.00259	0.000113286	0	115.983	58.0149
0.00277	0.000131745	0	115.825	57.9194
0.00294	0.000168847	0	115.669	57.8234
0.00312	0.000149656	0	115.489	57.7506
0.0033	0.000139962	0	115.398	57.6884
0.00348	0.000176705	0	115.182	57.5748
0.00366	0.000111217	0	114.936	57.4791
0.00384	0.000129333	0	114.735	57.3807
0.00402	0.000128838	0	114.471	57.2353
0.0042	0.000183515	0	114.271	57.1678
0.00438	0.000146275	0	114.025	57.0337
0.00456	0.000154758	0	113.742	56.8549
0.00475	0.000181466	0	113.528	56.7577
0.00493	0.000108486	0	113.256	56.6319
0.00511	0.000153138	9.0081e-06	112.981	56.5049
0.0053	0.000107609	8.96743e-06	112.666	56.3128
0.00548	0.000134049	0	112.37	56.2057
0.00567	0.000151421	0	112.161	56.091
0.00586	0.000194946	0	111.773	55.8641
0.00605	8.83006e-05	8.83006e-06	111.483	55.7532
0.00624	0.000228519	0	111.134	55.5668
0.00643	0.00010511	0	110.85	55.4463
0.00662	0.000122057	0	110.521	55.2485
0.00681	0.000147618	0	110.211	55.0962
0.007	0.000121088	0	109.863	54.9404
0.00719	0.000129124	8.60829e-06	109.467	54.7621
0.00739	0.000137038	0	109.063	54.5448
0.00758	0.000196065	0	108.724	54.3547
0.00778	0.000161254	8.48705e-06	108.303	54.1913
0.00797	0.000160453	0	107.899	53.9717
0.00817	0.000117677	0	107.56	53.7589
0.00837	0.000192375	0	107.099	53.5788
0.00857	0.000183143	0	106.74	53.3952
0.00877	0.000107731	0	106.38	53.195
0.00897	0.000107116	0	105.881	52.9554
0.00917	8.19732e-05	0	105.459	52.7279
0.00938	0.000122308	0	105	52.5273
0.00958	0.000129794	8.11211e-06	104.598	52.2974
0.00979	7.25652e-05	0	104.051	52.0377
0.00999	0.000216667	1.60494e-05	103.691	51.8399
0.0102	8.77886e-05	0	103.217	51.6174
0.01041	8.72842e-05	3.17397e-05	102.754	51.3707
0.01062	7.88996e-05	7.88996e-06	102.26	51.1425
0.01083	0.000117631	0	101.753	50.8776
0.01105	0.000124794	7.79962e-06	101.267	50.6499
0.01126	0.000123994	7.74964e-06	100.768	50.3698
0.01148	0.000138698	0	100.244	50.1425
0.01169	9.96794e-05	1.53353e-05	99.8685	49.9309
0.01191	0.000129367	1.52196e-05	99.2452	49.608
0.01213	0.000143822	0	98.7933	49.3952
0.01235	0.00015782	7.51525e-06	98.1967	49.0859
0.01257	0.000126952	0	97.6424	48.8219
0.0128	9.6483e-05	0	97.1617	48.5575
0.01302	0.000140056	0	96.5797	48.2989
0.01325	0.000131887	0	96.0651	48.0514
0.01348	0.000123664	1.45488e-05	95.4926	47.7376
0.01371	0.000144526	1.44526e-05	94.9363	47.4727
0.01394	0.000129198	1.43554e-05	94.3821	47.1906
0.01417	0.000106902	0	93.8002	46.8993
0.01441	0.000127252	7.06954e-06	93.1367	46.5643
0.01464	0.000133482	0	92.6175	46.3256
0.01488	9.76142e-05	6.97244e-06	92.0153	45.9959
0.01512	0.000110758	6.92235e-06	91.4218	45.7118
0.01536	6.18461e-05	0	90.8172	45.4164
0.01561	0.000129569	1.36388e-05	90.2202	45.1087
0.01585	0.000135345	6.76725e-06	89.6108	44.8027
0.0161	0.000134223	0	88.9442	44.4801
0.01635	9.32527e-05	0	88.3384	44.1777
0.0166	7.26788e-05	0	87.7	43.8556
0.01685	5.89958e-05	1.31102e-05	87.0913	43.5329
0.01711	6.49825e-05	6.49825e-06	86.3988	43.2118
0.01737	0.000141824	6.44654e-06	85.7956	42.9123
0.01763	0.000115066	6.39254e-06	85.1706	42.5745
0.01789	0.000139403	1.90095e-05	84.483	42.2351
0.01815	0.000106858	0	83.8313	41.931
0.01842	8.09125e-05	0	83.137	41.5414
0.01869	0.00015428	6.17121e-06	82.4792	41.234
0.01896	9.77695e-05	6.11059e-06	81.759	40.8593
0.01923	9.6969e-05	6.06056e-06	81.1028	40.5684
0.01951	8.40423e-05	0	80.4115	40.2189
0.01979	8.91731e-05	5.94488e-06	79.6989	39.8494
0.02007	0.00010605	0	79.0553	39.516
0.02036	0.000116642	1.16642e-05	78.3286	39.1558
0.02064	8.08202e-05	0	77.5762	38.7899
0.02093	0.000102935	0	76.9213	38.4481
0.02123	9.05343e-05	0	76.1571	38.0706
0.02152	0.000111979	5.59894e-06	75.4238	37.6981
0.02182	0.000127502	5.54358e-06	74.7201	37.3663
0.02213	7.12769e-05	0	73.9777	36.9793
0.02243	9.76396e-05	5.42442e-06	73.2241	36.617
0.02274	6.43926e-05	1.60982e-05	72.493	36.247
0.02306	7.95873e-05	5.30582e-06	71.7416	35.8737
0.02337	8.91477e-05	1.0488e-05	70.9664	35.4778
0.02369	8.295e-05	5.18438e-06	70.1922	35.0969
0.02402	9.2242e-05	1.53737e-05	69.442	34.7203
0.02434	0.000106361	1.01296e-05	68.6775	34.3422
0.02468	0.000110132	5.00601e-06	67.9441	33.9628
0.02501	0.000113659	0	67.1149	33.5513
0.02535	4.8814e-05	1.46442e-05	66.3567	33.1615
0.0257	9.64304e-05	0	65.562	32.7909
0.02605	9.04106e-05	9.51691e-06	64.7645	32.3792
0.0264	7.98608e-05	4.69769e-06	63.9821	31.9879
0.02676	8.34282e-05	9.2698e-06	63.1713	31.5882
0.02712	7.77183e-05	9.14333e-06	62.3524	31.1769
0.02749	9.91214e-05	0	61.507	30.748
0.02786	8.88958e-05	0	60.7218	30.354
0.02824	6.13027e-05	8.75753e-06	59.8539	29.9281
0.02863	9.0644e-05	8.63276e-06	59.0427	29.5273
0.02902	7.6577e-05	4.25428e-06	58.2365	29.1219
0.02941	0.00011311	4.18926e-06	57.3893	28.6915
0.02982	4.53887e-05	8.25249e-06	56.5716	28.2841
0.03022	8.118e-05	0	55.6775	27.8444
0.03064	6.39427e-05	0	54.8469	27.4358
0.03106	7.07635e-05	3.93131e-06	54.0072	27.0106
0.03149	4.6379e-05	1.54597e-05	53.135	26.5669
0.03193	7.21582e-05	1.13934e-05	52.2485	26.123
0.03237	3.73286e-05	3.73286e-06	51.403	25.6978
0.03283	5.86281e-05	7.32852e-06	50.4907	25.2391
0.03329	4.68059e-05	0	49.6444	24.8203
0.03376	8.47958e-05	1.41326e-05	48.7488	24.3697
0.03424	5.89539e-05	3.46788e-06	47.8646	23.9404
0.03473	7.47781e-05	1.3596e-05	46.9637	23.4806
0.03522	5.9938e-05	2.33092e-05	46.052	23.0162
0.03573	5.87533e-05	3.26407e-06	45.1658	22.5836
0.03625	7.67284e-05	3.19702e-06	44.2591	22.1323
0.03678	9.38022e-05	6.25348e-06	43.3337	21.6593
0.03733	9.17985e-05	3.05995e-06	42.4333	21.2156
0.03788	5.97955e-05	5.97955e-06	41.4818	20.7463
0.03845	4.96289e-05	5.83869e-06	40.5388	20.2721
0.03903	8.55351e-05	1.14047e-05	39.6198	19.8077
0.03963	6.40131e-05	2.78318e-06	38.6999	19.3514
0.04024	5.42318e-05	2.71159e-06	37.7363	18.8671
0.04087	4.22769e-05	5.28461e-06	36.801	18.3975
0.04152	5.1431e-05	5.1431e-06	35.8311	17.919
0.04218	2.75151e-05	1.75096e-05	34.8859	17.4436
0.04286	3.88728e-05	4.85909e-06	33.9117	16.955
0.04357	6.13132e-05	1.41492e-05	32.9418	16.4689
0.04429	3.65804e-05	1.37176e-05	31.9616	15.9772
0.04504	2.21423e-05	8.85693e-06	30.9751	15.4877
0.04582	4.28646e-05	8.57292e-06	30.0008	15
0.04662	4.55566e-05	8.28302e-06	29.0155	14.5066
0.04745	3.19512e-05	7.98781e-06	28.0035	14.0013
0.04831	4.42961e-05	7.70367e-06	27.0258	13.5106
0.04921	2.22162e-05	5.55405e-06	26.0022	12.9988
0.05015	2.31146e-05	0	24.9898	12.4913
0.05112	2.89836e-05	6.81967e-06	23.9776	11.9877
0.05214	3.91262e-05	1.14118e-05	22.9485	11.4742
0.0532	2.33479e-05	1.08957e-05	21.923	10.9636
0.05433	3.85195e-05	1.18521e-05	20.8871	10.4416
0.05551	2.67306e-05	5.62748e-06	19.8525	9.92637
0.05675	2.39674e-05	3.99456e-06	18.8082	9.40083
0.05808	1.50649e-05	7.53246e-06	17.7532	8.87112
0.05948	2.59728e-05	5.9029e-06	16.6997	8.35114
0.06099	1.32363e-05	6.61814e-06	15.6199	7.80836
0.06261	2.97671e-05	1.02645e-05	14.5465	7.27353
0.06435	1.70893e-05	2.84822e-06	13.4688	6.73256
0.06626	1.65773e-05	9.59739e-06	12.3854	6.19376
0.06835	1.27147e-05	4.76803e-06	11.2959	5.64447
0.07066	1.50481e-05	5.01604e-06	10.1932	5.09696
0.07327	1.14883e-05	6.38241e-06	9.08679	4.54245
0.07624	1.06246e-05	1.17429e-05	7.96825	3.98474
0.0797	1.10336e-05	5.75665e-06	6.84121	3.4208
0.08385	8.79891e-06	1.23985e-05	5.70752	2.85404
0.08904	4.79531e-06	1.21481e-05	4.5661	2.28222
0.09599	3.34619e-06	7.17041e-06	3.41246	1.70639
0.10651	3.94668e-06	8.05123e-06	2.24828	1.1245
0.1284	1.89598e-06	8.94903e-06	1.06734	0.5337
0.26177	1.4941e-07	8.27982e-06	0.14862	0.07431
0.49385	1.28792e-07	7.7347e-06	0.07143	0.03573
0.72757	1.06573e-07	8.27005e-06	0.0709	0.03548
0.96244	1.20188e-07	7.95364e-06	0.07058	0.03529
1.19911	8.41957e-08	8.27925e-06	0.07009	0.03502
1.43708	1.04668e-07	8.33856e-06	0.06967	0.03483
1.6766	8.31939e-08	7.98661e-06	0.06922	0.03461
1.91772	6.198e-08	8.25023e-06	0.06874	0.03438
2.16021	9.58711e-08	7.92991e-06	0.06837	0.03419
2.4043	1.08848e-07	8.00033e-06	0.06794	0.03396
2.64994	1.41963e-07	8.13248e-06	0.06749	0.03375
2.89719	1.27602e-07	7.93145e-06	0.06707	0.03352
3.14604	7.3402e-08	8.10091e-06	0.06662	0.03331
3.39654	1.06063e-07	8.3856e-06	0.06619	0.03309
3.64855	1.05426e-07	7.5907e-06	0.06579	0.03289
3.90223	7.20039e-08	7.61278e-06	0.06533	0.03268
4.15747	5.8552e-08	8.12571e-06	0.06494	0.03248
4.4145	7.75272e-08	8.30834e-06	0.06451	0.03225
4.67317	1.02712e-07	8.05651e-06	0.0641	0.03205
4.93371	6.37348e-08	7.91587e-06	0.06363	0.03182
5.19599	4.43176e-08	7.8632e-06	0.06323	0.0316
5.45998	8.17709e-08	7.66759e-06	0.06279	0.03141
5.72569	6.8745e-08	8.28065e-06	0.06239	0.03119
5.99308	6.21008e-08	7.97995e-06	0.06202	0.031
6.26258	3.6969e-08	7.99763e-06	0.06151	0.03076
6.53376	6.12341e-08	7.95431e-06	0.06112	0.03057
6.80707	6.07571e-08	8.15967e-06	0.06068	0.03033
7.08227	8.44745e-08	7.80786e-06	0.06022	0.03013
7.35927	6.59428e-08	8.38073e-06	0.05985	0.02993
7.63845	9.51649e-08	8.11281e-06	0.05938	0.0297
7.91928	7.09559e-08	7.91158e-06	0.05907	0.02952
8.20197	6.46159e-08	7.74804e-06	0.05867	0.02933
8.48676	6.99682e-08	7.92972e-06	0.05823	0.02911
8.77346	6.37112e-08	8.17241e-06	0.05783	0.02891
9.06248	6.31993e-08	8.11249e-06	0.05737	0.02868
9.35354	1.25514e-07	7.69061e-06	0.05697	0.02848
9.64653	6.80103e-08	7.65682e-06	0.05659	0.0283
9.94178	6.74911e-08	8.21704e-06	0.05616	0.02808
10.2393	6.69855e-08	8.16664e-06	0.05574	0.02787
10.539	6.09397e-08	8.08282e-06	0.05532	0.02766
10.8407	7.70509e-08	7.98027e-06	0.05496	0.02747
11.1448	4.91507e-08	7.82588e-06	0.05452	0.02727
11.4511	4.33604e-08	7.71274e-06	0.05411	0.02706
11.7599	6.45339e-08	7.86238e-06	0.05366	0.02686
12.0711	8.0045e-08	7.9458e-06	0.0533	0.02664
12.3847	5.82459e-08	7.90555e-06	0.05288	0.02644
12.7003	4.20927e-08	8.05549e-06	0.05255	0.02627
13.0184	5.22018e-08	7.89814e-06	0.05212	0.02607
13.3388	5.70071e-08	8.4526e-06	0.05176	0.02588
13.6619	7.7092e-08	7.85824e-06	0.05133	0.02566
13.9874	8.67161e-08	8.11051e-06	0.05094	0.02547
14.3157	8.09397e-08	7.85115e-06	0.05051	0.02526
14.6465	7.02809e-08	8.06222e-06	0.05013	0.02506
14.9796	3.48906e-08	7.79556e-06	0.04979	0.02489
15.3158	5.92712e-08	7.91764e-06	0.04935	0.02466
15.6543	4.90604e-08	8.35498e-06	0.049	0.0245
15.9957	7.29585e-08	8.14703e-06	0.04857	0.02429
16.3398	1.01337e-07	8.0732e-06	0.04818	0.0241
16.6866	9.0976e-08	7.74254e-06	0.04783	0.02391
17.0363	6.64807e-08	7.81148e-06	0.04742	0.02371
17.389	8.47452e-08	8.14025e-06	0.04702	0.02351
17.7445	3.26929e-08	7.78092e-06	0.04665	0.02332
18.1029	9.73057e-08	8.04394e-06	0.04627	0.02314
18.4642	6.89387e-08	8.16234e-06	0.04592	0.02295
18.8289	4.09825e-08	8.00526e-06	0.04548	0.02274
19.1961	9.04313e-08	8.22021e-06	0.04517	0.02258
19.5665	4.93139e-08	8.22645e-06	0.04478	0.02239
19.94	6.6682e-08	8.30858e-06	0.04441	0.0222
20.317	4.40487e-08	7.90674e-06	0.044	0.02201
20.6973	3.93032e-08	7.71653e-06	0.04363	0.02181
21.0806	4.33134e-08	8.08661e-06	0.04327	0.02164
21.4674	5.15198e-08	8.0328e-06	0.04289	0.02145
21.8576	5.53299e-08	8.18882e-06	0.04252	0.02126
22.2511	5.90659e-08	8.15954e-06	0.04215	0.02108
22.6485	6.26909e-08	8.14564e-06	0.04177	0.02088
23.0489	4.56143e-08	8.30181e-06	0.04143	0.02072
23.453	5.34255e-08	7.94396e-06	0.04106	0.02053
23.8605	4.0748e-08	8.0192e-06	0.04073	0.02036
24.2717	7.26905e-08	7.98788e-06	0.04036	0.02017
24.6867	7.60231e-08	7.65032e-06	0.03998	0.01999
25.1052	5.95208e-08	8.0234e-06	0.03964	0.01983
25.528	3.53472e-08	8.20448e-06	0.03925	0.01962
25.9542	4.67517e-08	8.04129e-06	0.03892	0.01947
26.3843	6.17661e-08	7.87132e-06	0.03858	0.01929
26.8186	7.64672e-08	7.82642e-06	0.03822	0.0191
27.2574	2.64937e-08	8.12223e-06	0.03783	0.01891
27.7	5.25182e-08	7.93775e-06	0.03749	0.01875
28.1468	5.20332e-08	7.87188e-06	0.03716	0.01858
28.5978	4.78637e-08	7.95642e-06	0.03679	0.0184
29.0529	2.91921e-08	7.87091e-06	0.03648	0.01824
29.5125	6.14213e-08	7.95587e-06	0.03612	0.01806
29.9762	4.29741e-08	7.86069e-06	0.03579	0.0179
30.4445	3.90029e-08	8.22252e-06	0.03545	0.01773
30.9172	5.62001e-08	7.94529e-06	0.03513	0.01756
31.395	3.47555e-08	8.02156e-06	0.03475	0.01738
31.8773	3.09904e-08	7.95077e-06	0.03445	0.01722
32.3641	2.04641e-08	7.79e-06	0.03411	0.01705
32.856	3.71335e-08	7.85204e-06	0.03375	0.01688
33.3528	7.0202e-08	7.70885e-06	0.03344	0.01671
33.8545	5.29529e-08	8.07201e-06	0.03309	0.01655
34.3609	3.93525e-08	8.13942e-06	0.0328	0.0164
34.8731	5.18659e-08	8.06839e-06	0.03243	0.01621
35.3904	6.74153e-08	8.12836e-06	0.03211	0.01606
35.9128	4.13232e-08	7.94359e-06	0.0318	0.0159
36.4405	3.46109e-08	7.97939e-06	0.03149	0.01574
36.9737	6.22928e-08	7.74922e-06	0.03116	0.01558
37.5122	3.08321e-08	8.06876e-06	0.03085	0.01543
38.0563	3.66281e-08	8.31762e-06	0.03054	0.01527
38.6061	6.03978e-08	7.81245e-06	0.03023	0.01511
39.1618	3.28695e-08	7.97832e-06	0.02992	0.01495
39.7238	2.65947e-08	7.98136e-06	0.02957	0.01479
40.2911	2.63427e-08	8.11357e-06	0.02929	0.01465
40.8647	4.9213e-08	7.94646e-06	0.02897	0.01449
41.4439	4.58702e-08	7.94701e-06	0.0287	0.01435
42.0297	2.26795e-08	8.07105e-06	0.02839	0.01419
42.6217	4.48797e-08	8.07835e-06	0.0281	0.01404
43.2198	3.05368e-08	7.98399e-06	0.02779	0.0139
43.8242	3.02246e-08	8.00952e-06	0.02752	0.01376
44.436	3.79976e-08	7.83566e-06	0.02718	0.01359
45.0544	4.29644e-08	7.78461e-06	0.02689	0.01345
45.6793	2.12585e-08	8.21108e-06	0.02662	0.01331
46.3116	3.41379e-08	8.02241e-06	0.02631	0.01316
46.9502	2.86025e-08	7.9775e-06	0.02606	0.01303
47.5962	3.0849e-08	7.83566e-06	0.02577	0.01288
48.2495	3.30435e-08	8.02957e-06	0.02547	0.01274
48.9099	4.77739e-08	8.10899e-06	0.0252	0.0126
49.5773	2.98559e-08	7.88446e-06	0.02494	0.01247
50.253	2.70322e-08	7.95485e-06	0.02464	0.01232
50.9363	3.40239e-08	8.2192e-06	0.02439	0.01218
51.6268	2.64504e-08	8.00966e-06	0.02412	0.01206
52.325	2.61629e-08	8.05817e-06	0.02384	0.01193
53.0314	1.88066e-08	7.99985e-06	0.02359	0.01179
53.7467	2.08919e-08	8.11071e-06	0.02328	0.01165
54.4697	3.44538e-08	7.88761e-06	0.02305	0.01153
55.2009	2.72494e-08	7.93639e-06	0.0228	0.01139
55.9404	2.24541e-08	7.84098e-06	0.02254	0.01127
56.6885	3.77339e-08	7.98182e-06	0.02229	0.01114
57.4458	2.85059e-08	7.99042e-06	0.02202	0.01101
58.2121	1.51691e-08	8.18484e-06	0.02177	0.01088
58.987	2.57157e-08	8.27404e-06	0.02153	0.01076
59.7712	3.38804e-08	8.16307e-06	0.02127	0.01064
60.5643	2.93101e-08	8.07492e-06	0.02104	0.01052
61.3668	2.48299e-08	7.92901e-06	0.02079	0.0104
62.1784	3.27391e-08	8.11519e-06	0.02057	0.01028
62.9993	3.843e-08	7.84175e-06	0.02033	0.01017
63.8301	3.79789e-08	8.06351e-06	0.0201	0.01005
64.6714	3.55285e-08	7.84389e-06	0.01985	0.00993
65.5226	1.36557e-08	7.98857e-06	0.01963	0.00981
66.3831	3.85928e-08	8.00029e-06	0.01942	0.00971
67.2542	2.85937e-08	7.95667e-06	0.01918	0.00959
68.136	3.20133e-08	7.94684e-06	0.01895	0.00948
69.0277	2.23461e-08	8.07441e-06	0.01876	0.00937
69.93	2.20852e-08	8.20098e-06	0.01854	0.00927
70.8436	2.90809e-08	7.94817e-06	0.01831	0.00916
71.7678	1.2577e-08	8.07266e-06	0.01811	0.00905
72.7031	3.19586e-08	8.07309e-06	0.0179	0.00895
73.6493	2.80776e-08	8.09161e-06	0.01769	0.00885
74.6062	2.08241e-08	8.05546e-06	0.01751	0.00875
75.5751	2.7423e-08	8.0435e-06	0.01728	0.00865
76.5558	2.70914e-08	7.97165e-06	0.01708	0.00854
77.5478	2.67809e-08	7.95728e-06	0.01689	0.00844
78.5529	1.81731e-08	8.15147e-06	0.01667	0.00834
79.5702	2.12218e-08	8.16548e-06	0.01648	0.00824
80.5985	2.74503e-08	8.14627e-06	0.01632	0.00815
81.6388	3.19267e-08	7.82045e-06	0.01613	0.00807
82.6919	2.36518e-08	8.03531e-06	0.01594	0.00797
83.7584	1.8683e-08	7.83283e-06	0.01574	0.00787
84.8371	1.38544e-08	8.07094e-06	0.01557	0.00778
85.9285	1.67365e-08	7.97873e-06	0.01539	0.00769
87.0334	1.80344e-08	7.86148e-06	0.01521	0.0076
88.1515	1.33666e-08	8.06749e-06	0.01504	0.00752
89.2824	1.90878e-08	8.06237e-06	0.01487	0.00744
90.4266	2.32211e-08	8.10272e-06	0.0147	0.00735
91.584	1.86515e-08	8.03019e-06	0.01454	0.00727
92.7563	1.13322e-08	8.04159e-06	0.01436	0.00718
93.9401	2.24434e-08	7.95899e-06	0.01423	0.00711
95.1397	3.46061e-08	7.89158e-06	0.01404	0.00702
96.3516	1.09611e-08	8.06327e-06	0.01391	0.00695
97.5792	1.488e-08	8.14477e-06	0.01374	0.00687
98.8208	2.00611e-08	8.02042e-06	0.01358	0.00679
100.076	2.2488e-08	7.98456e-06	0.01344	0.00672
101.347	1.43723e-08	7.99361e-06	0.01328	0.00664
102.632	1.55039e-08	8.00777e-06	0.01314	0.00657
103.932	1.40567e-08	8.02256e-06	0.013	0.0065
105.246	1.64194e-08	7.92805e-06	0.01286	0.00643
106.577	1.87254e-08	7.90211e-06	0.01271	0.00636
107.922	8.63999e-09	8.08826e-06	0.01257	0.00629
109.282	1.83163e-08	7.90409e-06	0.01244	0.00622
110.657	1.44935e-08	7.9956e-06	0.01232	0.00616
112.048	1.79029e-08	8.16013e-06	0.01218	0.00609
113.455	8.26201e-09	7.92917e-06	0.01204	0.00602
114.877	1.75197e-08	8.04855e-06	0.01192	0.00596
116.314	1.1554e-08	7.98036e-06	0.0118	0.0059
117.767	1.59973e-08	7.95637e-06	0.01168	0.00584
119.237	9.03722e-09	8.04878e-06	0.01155	0.00578
120.723	1.89944e-08	8.24914e-06	0.01143	0.00572
122.225	1.43702e-08	8.14682e-06	0.01132	0.00566
123.743	2.07847e-08	7.94849e-06	0.0112	0.0056
125.278	9.73746e-09	7.76508e-06	0.01108	0.00554
126.829	1.60642e-08	8.05779e-06	0.01098	0.00549
128.397	1.27056e-08	8.18243e-06	0.01086	0.00543
129.982	1.0474e-08	7.98745e-06	0.01075	0.00537
131.583	1.3486e-08	8.0138e-06	0.01065	0.00533
133.201	1.12923e-08	7.97851e-06	0.01055	0.00527
134.835	1.3208e-08	8.10867e-06	0.01044	0.00522
136.488	1.60769e-08	7.97717e-06	0.01034	0.00517
138.157	2.18855e-08	8.05585e-06	0.01024	0.00512
139.842	1.3798e-08	8.14572e-06	0.01014	0.00507
141.548	1.55748e-08	7.82924e-06	0.01003	0.00501
143.268	1.15793e-08	8.12098e-06	0.00995	0.00497
145.007	9.55193e-09	7.98923e-06	0.00985	0.00493
146.762	1.41909e-08	7.89109e-06	0.00976	0.00488
148.535	9.36695e-09	8.00125e-06	0.00967	0.00484
150.327	1.0192e-08	7.9757e-06	0.00957	0.00479
152.135	1.46981e-08	8.0233e-06	0.0095	0.00475
153.961	1.36394e-08	8.02722e-06	0.0094	0.0047
155.806	8.09979e-09	7.90449e-06	0.00932	0.00466
157.667	1.16e-08	7.99775e-06	0.00924	0.00462
159.547	1.5899e-08	8.03957e-06	0.00915	0.00458
161.444	1.05044e-08	7.89058e-06	0.00908	0.00454
163.359	1.73407e-08	8.01574e-06	0.009	0.0045
165.293	5.15207e-09	7.99344e-06	0.00891	0.00446
167.244	8.50885e-09	7.99662e-06	0.00884	0.00442
169.213	1.43382e-08	7.91636e-06	0.00877	0.00438
171.201	9.18785e-09	8.05942e-06	0.00869	0.00434
173.206	1.73981e-08	8.00726e-06	0.00862	0.00431
175.23	4.10019e-09	8.10935e-06	0.00854	0.00427
177.272	1.46421e-08	8.14344e-06	0.00848	0.00424
179.332	1.20894e-08	8.05315e-06	0.0084	0.0042
181.409	8.79377e-09	7.97595e-06	0.00834	0.00417
183.505	7.9224e-09	8.03015e-06	0.00827	0.00413
185.618	1.179e-08	7.97163e-06	0.00821	0.0041
187.748	8.57337e-09	8.07222e-06	0.00815	0.00407
189.898	1.00434e-08	8.04557e-06	0.00808	0.00404
192.066	1.14889e-08	7.95338e-06	0.00801	0.00401
194.251	9.87992e-09	7.92978e-06	0.00796	0.00398
196.454	1.58284e-08	7.86067e-06	0.0079	0.00395
198.676	1.41989e-08	8.07172e-06	0.00783	0.00392
200.915	5.9326e-09	7.89406e-06	0.00778	0.00389
203.171	1.03056e-08	7.94343e-06	0.00773	0.00386
205.445	1.31425e-08	8.11037e-06	0.00767	0.00384
207.738	1.0865e-08	8.03283e-06	0.00761	0.00381
210.047	1.00672e-08	7.85022e-06	0.00756	0.00378
212.374	1.35586e-08	7.94463e-06	0.00751	0.00375
214.718	1.0626e-08	8.03113e-06	0.00746	0.00373
217.081	1.26464e-08	7.86397e-06	0.0074	0.0037
219.461	9.0734e-09	8.06136e-06	0.00736	0.00368
221.858	9.00524e-09	8.02574e-06	0.00731	0.00365
224.271	1.6512e-08	7.91473e-06	0.00726	0.00363
226.702	1.16136e-08	8.01818e-06	0.00722	0.00361
229.148	1.22192e-08	8.03953e-06	0.00718	0.00359
231.612	1.0111e-08	8.01464e-06	0.00713	0.00356
234.091	6.02706e-09	7.99657e-06	0.00709	0.00354
236.586	1.26453e-08	8.05973e-06	0.00705	0.00352
239.1	9.90934e-09	7.91822e-06	0.007	0.0035
241.631	9.18386e-09	7.9893e-06	0.00695	0.00348
244.176	8.48301e-09	8.07321e-06	0.00692	0.00346
246.735	9.73242e-09	8.03574e-06	0.00688	0.00344
249.311	9.02699e-09	8.03274e-06	0.00685	0.00342
251.903	5.76532e-09	7.86261e-06	0.0068	0.0034
254.51	8.91693e-09	7.91122e-06	0.00677	0.00338
257.132	7.59863e-09	7.95893e-06	0.00673	0.00337
259.772	8.80561e-09	7.93826e-06	0.00669	0.00334
262.427	8.75776e-09	8.09717e-06	0.00666	0.00333
265.094	1.30763e-08	8.10296e-06	0.00663	0.00332
267.778	9.27962e-09	8.02687e-06	0.00659	0.0033
270.475	1.04669e-08	7.96653e-06	0.00656	0.00328
273.185	1.40945e-08	7.9744e-06	0.00654	0.00327
275.911	6.08957e-09	8.05407e-06	0.0065	0.00325
278.647	9.1047e-09	7.99211e-06	0.00648	0.00324
281.399	9.65392e-09	8.02482e-06	0.00645	0.00322
284.165	5.40307e-09	7.96712e-06	0.00642	0.00321
286.942	9.56662e-09	8.05928e-06	0.00639	0.0032
289.735	1.01079e-08	7.82113e-06	0.00636	0.00318
292.54	6.51344e-09	8.06541e-06	0.00633	0.00317
295.354	1.17992e-08	7.93789e-06	0.00632	0.00316
298.182	5.28574e-09	8.0537e-06	0.00629	0.00314
301.021	9.94153e-09	7.98305e-06	0.00627	0.00313
303.875	4.65565e-09	8.12469e-06	0.00624	0.00312
306.74	5.79483e-09	7.94065e-06	0.00621	0.00311
309.615	9.81797e-09	7.95717e-06	0.00619	0.0031
312.5	6.90812e-09	7.90635e-06	0.00618	0.00309
315.398	9.16769e-09	7.94553e-06	0.00615	0.00308
318.309	7.41585e-09	7.9612e-06	0.00613	0.00306
321.229	7.39286e-09	7.98657e-06	0.00611	0.00305
324.16	9.06433e-09	8.05649e-06	0.00609	0.00304
327.1	5.08248e-09	8.01733e-06	0.00607	0.00304
330.048	1.01395e-08	8.10931e-06	0.00606	0.00303
333.01	5.60636e-09	8.1382e-06	0.00603	0.00302
335.98	6.70964e-09	8.05493e-06	0.00602	0.00301
338.959	6.68801e-09	8.10866e-06	0.006	0.003
341.948	7.22317e-09	7.9916e-06	0.00598	0.00299
344.944	6.096e-09	7.98132e-06	0.00597	0.00299
347.952	2.76059e-09	8.07195e-06	0.00595	0.00297
350.968	8.25881e-09	8.0171e-06	0.00594	0.00297
353.99	4.9453e-09	8.11469e-06	0.00592	0.00296
357.019	6.57744e-09	7.88086e-06	0.00591	0.00296
360.059	6.0101e-09	7.96393e-06	0.00589	0.00295
363.107	5.99272e-09	8.01609e-06	0.00588	0.00294
366.16	9.78826e-09	7.98178e-06	0.00587	0.00293
369.22	1.35672e-08	8.06598e-06	0.00586	0.00293
372.287	7.03795e-09	7.81645e-06	0.00585	0.00292
375.361	7.02249e-09	7.96567e-06	0.00584	0.00292
378.443	9.1598e-09	7.98572e-06	0.00582	0.00291
381.533	1.23606e-08	7.9441e-06	0.00581	0.0029
384.627	5.90315e-09	8.02131e-06	0.0058	0.0029
387.728	1.17833e-08	7.96391e-06	0.00579	0.0029
390.835	4.80987e-09	7.99186e-06	0.00578	0.00289
393.949	6.9312e-09	8.03273e-06	0.00577	0.00288
397.068	1.11796e-08	8.08976e-06	0.00576	0.00288
400.194	1.00929e-08	7.98615e-06	0.00575	0.00287
403.323	4.7768e-09	8.02769e-06	0.00574	0.00287
406.458	6.35619e-09	8.09778e-06	0.00573	0.00287
409.598	5.28835e-09	7.94469e-06	0.00573	0.00286
412.742	9.50692e-09	7.96996e-06	0.00572	0.00286
415.891	5.80136e-09	7.89882e-06	0.00571	0.00286
419.044	5.79168e-09	7.95777e-06	0.0057	0.00285
422.207	8.40011e-09	7.99953e-06	0.00569	0.00284
425.373	6.29375e-09	7.90967e-06	0.00568	0.00284
428.544	1.04739e-08	7.9968e-06	0.00568	0.00284
431.715	7.33112e-09	8.11712e-06	0.00568	0.00284
434.889	9.41833e-09	8.03802e-06	0.00567	0.00284
438.068	7.31138e-09	8.00596e-06	0.00566	0.00283
441.256	9.89804e-09	8.0195e-06	0.00565	0.00282
444.448	6.76306e-09	7.97625e-06	0.00564	0.00282
447.638	5.72506e-09	8.07649e-06	0.00564	0.00282
450.832	5.20004e-09	7.96854e-06	0.00564	0.00282
454.029	5.71376e-09	8.0481e-06	0.00563	0.00282
457.234	2.07238e-09	8.07401e-06	0.00562	0.00281
460.439	5.18044e-09	7.94524e-06	0.00562	0.00281
463.649	6.72488e-09	8.01554e-06	0.00561	0.00281
466.862	6.20219e-09	7.91399e-06	0.00561	0.0028
470.077	9.29563e-09	7.84086e-06	0.0056	0.0028
473.297	5.67315e-09	8.05226e-06	0.0056	0.0028
476.516	4.64258e-09	7.95223e-06	0.0056	0.0028
479.742	6.69118e-09	8.03662e-06	0.00559	0.00279
482.968	6.17675e-09	8.02874e-06	0.00559	0.00279
486.196	5.65916e-09	7.98867e-06	0.00558	0.00279
489.429	1.0273e-08	8.03041e-06	0.00558	0.00279
492.661	1.13016e-08	7.93319e-06	0.00558	0.00279
495.897	4.10565e-09	8.03321e-06	0.00557	0.00279
499.132	6.15957e-09	7.97511e-06	0.00558	0.00279
502.374	6.14648e-09	7.97454e-06	0.00556	0.00278
505.616	8.19446e-09	8.00701e-06	0.00556	0.00278
508.86	5.63071e-09	8.00533e-06	0.00556	0.00278
512.105	8.6992e-09	7.8692e-06	0.00556	0.00278
515.353	5.62316e-09	7.90565e-06	0.00555	0.00278
518.602	6.13413e-09	7.97794e-06	0.00556	0.00278
521.854	1.22549e-08	8.01982e-06	0.00555	0.00277
525.104	1.43043e-08	8.03391e-06	0.00555	0.00278
528.361	5.0987e-09	7.96571e-06	0.00554	0.00277
531.617	5.60943e-09	8.07349e-06	0.00554	0.00277
534.87	8.16791e-09	7.9535e-06	0.00555	0.00277
538.131	8.65768e-09	7.9834e-06	0.00554	0.00277
541.39	5.6046e-09	7.97586e-06	0.00554	0.00277
544.652	8.14458e-09	7.96286e-06	0.00553	0.00277
547.916	5.59692e-09	7.97562e-06	0.00553	0.00277
551.18	6.61217e-09	7.99106e-06	0.00553	0.00276
554.445	9.66398e-09	7.99618e-06	0.00553	0.00277
557.711	6.10138e-09	7.98061e-06	0.00553	0.00276
560.98	7.11099e-09	8.00291e-06	0.00552	0.00276
564.251	9.6466e-09	7.91478e-06	0.00552	0.00276
567.523	8.62654e-09	7.97092e-06	0.00552	0.00276
570.796	8.11771e-09	8.0619e-06	0.00552	0.00276
574.067	9.13807e-09	7.95875e-06	0.00552	0.00276
577.339	8.6278e-09	7.97311e-06	0.00552	0.00276
580.612	7.10157e-09	7.99789e-06	0.00552	0.00276
583.889	9.12254e-09	8.00148e-06	0.00551	0.00276
587.165	9.12296e-09	8.00286e-06	0.00551	0.00276
590.444	7.59761e-09	8.05245e-06	0.00551	0.00275
593.724	7.59256e-09	8.00459e-06	0.00551	0.00275
597.006	7.08409e-09	7.99085e-06	0.0055	0.00275
600.284	6.07937e-09	8.11394e-06	0.00551	0.00276
603.565	5.56638e-09	8.04747e-06	0.0055	0.00275
606.844	8.10296e-09	8.01686e-06	0.00551	0.00275
610.124	5.56884e-09	7.96546e-06	0.00551	0.00275
613.406	9.61331e-09	8.0686e-06	0.0055	0.00275
616.691	1.11194e-08	8.00142e-06	0.0055	0.00275
619.977	4.04266e-09	8.00851e-06	0.0055	0.00275
623.261	6.06792e-09	8.0673e-06	0.0055	0.00275
626.546	5.56099e-09	8.03058e-06	0.0055	0.00275
629.831	5.05423e-09	7.98366e-06	0.0055	0.00275
633.117	7.07468e-09	7.9767e-06	0.0055	0.00275
636.403	1.01072e-08	7.97608e-06	0.0055	0.00275
639.692	6.56454e-09	8.02792e-06	0.0055	0.00275
642.978	7.07504e-09	8.00085e-06	0.0055	0.00275
646.265	7.07261e-09	7.97942e-06	0.0055	0.00275
649.553	6.56456e-09	7.96887e-06	0.0055	0.00275
652.844	9.08095e-09	7.8858e-06	0.00549	0.00275
656.137	6.55698e-09	7.99699e-06	0.00549	0.00274
659.426	7.06761e-09	8.00205e-06	0.00549	0.00275
662.714	7.576e-09	7.9452e-06	0.00549	0.00275
666.004	6.05704e-09	7.97661e-06	0.00549	0.00275
669.294	5.04593e-09	7.96197e-06	0.00549	0.00275
672.584	6.56303e-09	7.90038e-06	0.00549	0.00275
675.874	7.57079e-09	7.89886e-06	0.00549	0.00275
679.163	6.5633e-09	8.01681e-06	0.00549	0.00275
682.455	9.5818e-09	8.10771e-06	0.00549	0.00274
685.748	6.55605e-09	7.8955e-06	0.00549	0.00274
689.038	7.06662e-09	8.01001e-06	0.00549	0.00275
692.331	1.1094e-08	7.97555e-06	0.00549	0.00274
695.625	5.54552e-09	8.02033e-06	0.00549	0.00274
698.922	6.0426e-09	7.98126e-06	0.00548	0.00274
702.215	7.06004e-09	8.05651e-06	0.00549	0.00274
705.51	4.53551e-09	8.10394e-06	0.00549	0.00274
708.804	7.05887e-09	8.03652e-06	0.00549	0.00274
712.094	8.5785e-09	8.01837e-06	0.00549	0.00275
715.39	6.04626e-09	8.05262e-06	0.00548	0.00274
718.684	6.04897e-09	7.98413e-06	0.00549	0.00274
721.98	6.04491e-09	8.00044e-06	0.00548	0.00274
725.276	1.00772e-08	7.92373e-06	0.00548	0.00274
728.572	7.55638e-09	7.89944e-06	0.00548	0.00274
731.868	8.56498e-09	8.04101e-06	0.00548	0.00274
735.162	6.05052e-09	8.07946e-06	0.00549	0.00274
738.455	9.07479e-09	7.9964e-06	0.00549	0.00274
741.755	6.03937e-09	8.03287e-06	0.00548	0.00274
745.049	6.04873e-09	8.0816e-06	0.00549	0.00274
748.345	7.55762e-09	8.01359e-06	0.00548	0.00274
751.638	6.05048e-09	8.00832e-06	0.00549	0.00274
754.932	4.53662e-09	7.94564e-06	0.00549	0.00274
758.229	3.52568e-09	8.10856e-06	0.00548	0.00274
761.527	9.06457e-09	8.02869e-06	0.00548	0.00274
764.822	5.03913e-09	8.01575e-06	0.00549	0.00274
768.121	7.54955e-09	8.06392e-06	0.00548	0.00274
771.418	6.54818e-09	7.92985e-06	0.00548	0.00274
774.719	9.05377e-09	7.94669e-06	0.00547	0.00274
778.017	7.05033e-09	8.00213e-06	0.00548	0.00274
781.314	7.05087e-09	7.93978e-06	0.00548	0.00274
784.612	1.05736e-08	8.09636e-06	0.00548	0.00274
787.911	7.04549e-09	7.91159e-06	0.00548	0.00274
791.207	5.03802e-09	8.04421e-06	0.00548	0.00274
794.505	5.53917e-09	7.92404e-06	0.00548	0.00274
797.802	7.05147e-09	7.98982e-06	0.00548	0.00274
801.098	5.54115e-09	8.05381e-06	0.00548	0.00274
804.396	5.53855e-09	7.95789e-06	0.00548	0.00274
807.697	9.55773e-09	7.88965e-06	0.00547	0.00274
810.995	3.52439e-09	8.00893e-06	0.00548	0.00274
814.296	8.55386e-09	7.97723e-06	0.00548	0.00274
817.593	6.54687e-09	7.92372e-06	0.00548	0.00274
820.891	7.04948e-09	8.00267e-06	0.00548	0.00274
824.187	8.05874e-09	8.05975e-06	0.00548	0.00274
827.487	4.52877e-09	7.92183e-06	0.00548	0.00274
830.784	5.54176e-09	8.04815e-06	0.00548	0.00274
834.081	5.53905e-09	7.91883e-06	0.00548	0.00274
837.382	7.54642e-09	7.82916e-06	0.00548	0.00274
840.68	4.02812e-09	8.08444e-06	0.00548	0.00274
843.979	9.05918e-09	7.90665e-06	0.00548	0.00274
847.278	9.06182e-09	8.04991e-06	0.00548	0.00274
850.575	7.55427e-09	7.93048e-06	0.00548	0.00274
853.874	6.03967e-09	8.00961e-06	0.00548	0.00274
857.174	1.00646e-08	7.88865e-06	0.00548	0.00274
860.476	7.03897e-09	8.02493e-06	0.00547	0.00274
863.774	7.55283e-09	7.97931e-06	0.00548	0.00274
867.072	4.53163e-09	8.08292e-06	0.00548	0.00274
870.373	7.0426e-09	7.91186e-06	0.00548	0.00274
873.674	9.55936e-09	7.91213e-06	0.00548	0.00274
876.975	5.02946e-09	7.97018e-06	0.00547	0.00274
880.278	5.02761e-09	7.98335e-06	0.00547	0.00274
883.58	6.0344e-09	8.02223e-06	0.00547	0.00274
886.88	1.05665e-08	7.90776e-06	0.00548	0.00274
890.179	5.53711e-09	7.98853e-06	0.00548	0.00274
893.48	5.53382e-09	8.03763e-06	0.00548	0.00274
896.777	8.56336e-09	8.17146e-06	0.00548	0.00274
900.078	6.03491e-09	7.9701e-06	0.00548	0.00274
903.379	6.5407e-09	8.04507e-06	0.00547	0.00274
906.678	6.54285e-09	7.95007e-06	0.00548	0.00274
909.977	4.53082e-09	8.01251e-06	0.00548	0.00274
913.278	5.53296e-09	8.05901e-06	0.00547	0.00274
916.576	7.55115e-09	8.06664e-06	0.00548	0.00274
919.876	7.04526e-09	7.9853e-06	0.00548	0.00274
923.177	7.54514e-09	7.99533e-06	0.00547	0.00274
926.478	7.54681e-09	8.17923e-06	0.00548	0.00274
929.777	5.53626e-09	8.07237e-06	0.00548	0.00274
933.077	7.54792e-09	8.08785e-06	0.00548	0.00274
936.376	6.03968e-09	7.99955e-06	0.00548	0.00274
939.678	9.05378e-09	7.90847e-06	0.00548	0.00274
942.977	3.52375e-09	7.98783e-06	0.00548	0.00274
946.278	9.0527e-09	7.98498e-06	0.00547	0.00274
949.578	7.04466e-09	8.05255e-06	0.00548	0.00274
952.879	6.54097e-09	8.01169e-06	0.00548	0.00274
956.183	7.03424e-09	7.90146e-06	0.00547	0.00273
959.48	7.55511e-09	8.13988e-06	0.00548	0.00274
962.781	6.03678e-09	7.96151e-06	0.00548	0.00274
966.083	6.53807e-09	8.04837e-06	0.00548	0.00274
969.384	8.55087e-09	7.99004e-06	0.00548	0.00274
972.688	1.00535e-08	7.98144e-06	0.00547	0.00274
975.989	8.55184e-09	7.96126e-06	0.00548	0.00274
979.286	7.04992e-09	8.01928e-06	0.00548	0.00274
982.588	6.03547e-09	7.83957e-06	0.00547	0.00274
985.888	9.56007e-09	7.97713e-06	0.00548	0.00274
989.191	6.0325e-09	7.90408e-06	0.00547	0.00274
992.493	6.5371e-09	8.10248e-06	0.00547	0.00274
995.795	8.04669e-09	8.05222e-06	0.00547	0.00274
999.097	9.05222e-09	7.99563e-06	0.00547	0.00274
1002.4	8.04316e-09	8.11253e-06	0.00547	0.00274
1005.7	9.05357e-09	7.93042e-06	0.00548	0.00274
1009	5.03273e-09	7.97637e-06	0.00548	0.00274
1012.3	3.52169e-09	7.92934e-06	0.00547	0.00274
1015.6	8.04982e-09	7.91247e-06	0.00548	0.00274
1018.9	6.03653e-09	7.99589e-06	0.00548	0.00274
1022.21	7.53784e-09	8.17353e-06	0.00547	0.00274
1025.51	4.52828e-09	7.97581e-06	0.00548	0.00274
1028.81	6.03457e-09	7.99731e-06	0.00548	0.00274
1032.12	5.52668e-09	7.86146e-06	0.00547	0.00273
1035.42	5.53173e-09	8.0034e-06	0.00548	0.00274
1038.72	6.53764e-09	7.87685e-06	0.00548	0.00274
1042.02	6.03138e-09	7.91769e-06	0.00547	0.00274
1045.32	6.53906e-09	8.05361e-06	0.00548	0.00274
1048.62	5.53428e-09	8.04685e-06	0.00548	0.00274
1051.92	9.05812e-09	7.97215e-06	0.00548	0.00274
1055.23	9.05589e-09	8.00289e-06	0.00548	0.00274
1058.52	8.05623e-09	7.97618e-06	0.00548	0.00274
1061.83	6.53499e-09	7.88069e-06	0.00547	0.00274
1065.13	6.03953e-09	8.10253e-06	0.00548	0.00274
1068.43	1.1066e-08	7.9932e-06	0.00547	0.00274
1071.73	7.54185e-09	8.0195e-06	0.00547	0.00274
1075.03	6.54005e-09	8.002e-06	0.00548	0.00274
1078.33	4.02809e-09	7.97159e-06	0.00548	0.00274
1081.63	7.03574e-09	7.85741e-06	0.00547	0.00274
1084.93	6.53931e-09	8.0016e-06	0.00547	0.00274
1088.24	8.03783e-09	8.00517e-06	0.00547	0.00273
1091.54	5.02925e-09	8.05033e-06	0.00548	0.00274
1094.84	1.05609e-08	7.96241e-06	0.00547	0.00274
1098.14	4.52908e-09	7.85847e-06	0.00548	0.00274
1101.45	6.53587e-09	7.91242e-06	0.00547	0.00274
1104.74	1.15781e-08	8.00196e-06	0.00548	0.00274
1108.04	9.05773e-09	8.03521e-06	0.00548	0.00274
1111.34	5.53793e-09	8.02648e-06	0.00548	0.00274
1114.65	8.04136e-09	8.0489e-06	0.00547	0.00274
1117.95	1.25771e-08	8.14697e-06	0.00548	0.00274
1121.25	3.5242e-09	8.01352e-06	0.00548	0.00274
1124.54	7.04989e-09	7.91753e-06	0.00548	0.00274
1127.84	8.55886e-09	7.9693e-06	0.00548	0.00274
1131.14	7.55158e-09	7.95634e-06	0.00548	0.00274
1134.44	4.02771e-09	7.9804e-06	0.00548	0.00274
1137.74	4.0208e-09	7.9255e-06	0.00547	0.00274
1141.04	4.02423e-09	8.03991e-06	0.00547	0.00274
1144.34	8.04748e-09	7.9665e-06	0.00548	0.00274
1147.65	5.53353e-09	7.96576e-06	0.00548	0.00274
1150.94	7.04875e-09	7.97465e-06	0.00548	0.00274
1154.24	8.55894e-09	7.9427e-06	0.00548	0.00274
1157.54	7.54589e-09	8.03335e-06	0.00548	0.00274
1160.84	1.20705e-08	7.96248e-06	0.00547	0.00274
1164.14	7.54721e-09	8.01061e-06	0.00548	0.00274
1167.45	6.53715e-09	7.9371e-06	0.00547	0.00274
1170.75	7.54175e-09	7.97314e-06	0.00547	0.00274
1174.05	9.05107e-09	8.04841e-06	0.00548	0.00274
1177.35	5.53444e-09	8.12807e-06	0.00548	0.00274
1180.65	7.54804e-09	7.98532e-06	0.00548	0.00274
1183.95	6.0377e-09	7.85505e-06	0.00548	0.00274
1187.25	9.55754e-09	7.85479e-06	0.00548	0.00274
1190.55	5.53533e-09	7.93514e-06	0.00548	0.00274
1193.85	9.06245e-09	7.99308e-06	0.00548	0.00274
1197.15	9.04862e-09	8.08393e-06	0.00547	0.00274
1200	8.17008e-09	7.95183e-06	0.00547	0.00274
1200	0	0	0.00135	0
1229.48	0	0	0	0
1270.83	0	0	0	0
1324.52	0	0	0	0
1389.8	0	0	0	0
1465.99	0	0	0	0
1552.26	0	0	0	0
1647.92	0	0	0	0
1752.83	0	0	0	0
1867.62	0	0	0	0
1993.67	0	0	0	0
2133.04	0	0	0	0
2288.7	0	0	0	0
2400	0	0	0	0

## Sheet: Fig 3c
time	X	B	Y	TN
s	% of diads	% of diads	% of diads	% of diads
0	0	0	0	0
0.000169938	1.63206	1.18474	0.28946	96.8937
0.000340247	1.63868	1.17891	0.28947	96.8929
0.000510859	1.64093	1.17872	0.29057	96.8898
0.000681856	1.64148	1.17964	0.29092	96.888
0.000853262	1.64235	1.1797	0.29071	96.8872
0.00103	1.6421	1.17973	0.29145	96.8867
0.0012	1.64194	1.18153	0.29188	96.8846
0.00137	1.64159	1.18165	0.29173	96.885
0.00154	1.64219	1.18128	0.29164	96.8849
0.00172	1.64169	1.18087	0.29171	96.8857
0.00189	1.64164	1.18144	0.29166	96.8853
0.00206	1.64206	1.18115	0.29168	96.8851
0.00224	1.64199	1.18145	0.29185	96.8847
0.00241	1.6419	1.18125	0.2919	96.885
0.00259	1.64163	1.18115	0.29202	96.8852
0.00277	1.6418	1.18161	0.29246	96.8841
0.00294	1.64131	1.1814	0.2926	96.8847
0.00312	1.64088	1.18173	0.29241	96.885
0.0033	1.64097	1.18202	0.29238	96.8846
0.00348	1.64113	1.18182	0.29227	96.8848
0.00366	1.641	1.1823	0.29226	96.8844
0.00384	1.6409	1.18211	0.29229	96.8847
0.00402	1.64069	1.18228	0.29219	96.8849
0.0042	1.64029	1.18237	0.29228	96.8851
0.00438	1.64051	1.18218	0.29234	96.885
0.00456	1.64065	1.18214	0.29246	96.8847
0.00475	1.6408	1.18254	0.29237	96.8843
0.00493	1.64091	1.18288	0.29237	96.8838
0.00511	1.64097	1.18279	0.29239	96.8838
0.0053	1.64084	1.18292	0.29233	96.8839
0.00548	1.64113	1.18275	0.29227	96.8838
0.00567	1.64115	1.18247	0.29229	96.8841
0.00586	1.64135	1.18277	0.29234	96.8835
0.00605	1.64129	1.18277	0.29237	96.8836
0.00624	1.64105	1.18267	0.29236	96.8839
0.00643	1.64097	1.18257	0.29235	96.8841
0.00662	1.641	1.1826	0.29228	96.8841
0.00681	1.64119	1.18269	0.29226	96.8839
0.007	1.6412	1.1828	0.29216	96.8838
0.00719	1.64105	1.18271	0.29216	96.8841
0.00739	1.64104	1.18277	0.29213	96.8841
0.00758	1.64114	1.18281	0.29211	96.8839
0.00778	1.64117	1.18265	0.29208	96.8841
0.00797	1.64111	1.18253	0.2921	96.8843
0.00817	1.64127	1.1824	0.29214	96.8842
0.00837	1.64128	1.18232	0.29214	96.8843
0.00857	1.64133	1.18236	0.29212	96.8842
0.00877	1.64157	1.18231	0.29219	96.8839
0.00897	1.64177	1.18235	0.29216	96.8837
0.00917	1.64165	1.18233	0.29223	96.8838
0.00938	1.64174	1.18232	0.2922	96.8837
0.00958	1.64157	1.18232	0.29219	96.8839
0.00979	1.64147	1.18229	0.2922	96.884
0.00999	1.64148	1.18242	0.29219	96.8839
0.0102	1.6415	1.18231	0.29223	96.884
0.01041	1.64145	1.18225	0.29222	96.8841
0.01062	1.64148	1.18216	0.29217	96.8842
0.01083	1.64135	1.18219	0.2922	96.8843
0.01105	1.64139	1.18221	0.29224	96.8842
0.01126	1.64139	1.18224	0.29228	96.8841
0.01148	1.64139	1.18232	0.29223	96.8841
0.01169	1.64124	1.18238	0.29223	96.8842
0.01191	1.64126	1.1824	0.29226	96.8841
0.01213	1.6412	1.18242	0.29225	96.8841
0.01235	1.64122	1.18243	0.29228	96.8841
0.01257	1.64107	1.18249	0.29228	96.8842
0.0128	1.64102	1.18256	0.29227	96.8841
0.01302	1.64102	1.18249	0.2922	96.8843
0.01325	1.64101	1.18247	0.2922	96.8843
0.01348	1.64097	1.18237	0.2922	96.8845
0.01371	1.641	1.18246	0.29222	96.8843
0.01394	1.64094	1.1825	0.29223	96.8843
0.01417	1.64092	1.18256	0.29226	96.8843
0.01441	1.64099	1.18246	0.29226	96.8843
0.01464	1.64112	1.18244	0.29225	96.8842
0.01488	1.64112	1.18241	0.29224	96.8842
0.01512	1.64118	1.18245	0.29227	96.8841
0.01536	1.64117	1.18258	0.2923	96.8839
0.01561	1.64119	1.1825	0.2923	96.884
0.01585	1.64121	1.18246	0.29231	96.884
0.0161	1.64111	1.18251	0.2923	96.8841
0.01635	1.64111	1.18251	0.29228	96.8841
0.0166	1.64109	1.18245	0.29228	96.8842
0.01685	1.64111	1.18238	0.29227	96.8842
0.01711	1.64108	1.1824	0.29226	96.8843
0.01737	1.64107	1.18242	0.29232	96.8842
0.01763	1.64114	1.18239	0.29229	96.8842
0.01789	1.64108	1.1823	0.29227	96.8843
0.01815	1.64116	1.18226	0.29231	96.8843
0.01842	1.64112	1.18233	0.29229	96.8843
0.01869	1.64113	1.18231	0.29229	96.8843
0.01896	1.64111	1.18234	0.29233	96.8842
0.01923	1.6411	1.18236	0.29232	96.8842
0.01951	1.6411	1.1824	0.2923	96.8842
0.01979	1.64102	1.18245	0.2923	96.8842
0.02007	1.64105	1.18239	0.29234	96.8842
0.02036	1.64116	1.18241	0.29233	96.8841
0.02064	1.64116	1.18237	0.29233	96.8841
0.02093	1.64112	1.18231	0.29231	96.8843
0.02123	1.64115	1.18231	0.29231	96.8842
0.02152	1.64116	1.18229	0.2923	96.8842
0.02182	1.6411	1.18224	0.29232	96.8843
0.02213	1.64108	1.18229	0.29236	96.8843
0.02243	1.64102	1.18235	0.29232	96.8843
0.02274	1.64093	1.18243	0.29234	96.8843
0.02306	1.6409	1.18243	0.29234	96.8843
0.02337	1.64088	1.18251	0.29236	96.8842
0.02369	1.64088	1.18251	0.29233	96.8843
0.02402	1.64081	1.1825	0.29232	96.8844
0.02434	1.64087	1.18249	0.29232	96.8843
0.02468	1.6409	1.18247	0.2923	96.8843
0.02501	1.64093	1.18254	0.29228	96.8843
0.02535	1.64092	1.1825	0.29232	96.8843
0.0257	1.6409	1.18245	0.2923	96.8844
0.02605	1.64091	1.18244	0.2923	96.8844
0.0264	1.64097	1.18246	0.29229	96.8843
0.02676	1.64096	1.18245	0.29226	96.8843
0.02712	1.64098	1.1825	0.29227	96.8842
0.02749	1.64102	1.1825	0.29226	96.8842
0.02786	1.64091	1.18247	0.29226	96.8844
0.02824	1.64088	1.18241	0.29226	96.8845
0.02863	1.64091	1.18242	0.29226	96.8844
0.02902	1.64099	1.18238	0.29227	96.8844
0.02941	1.64098	1.18235	0.29227	96.8844
0.02982	1.64099	1.18234	0.2923	96.8844
0.03022	1.64102	1.18235	0.29229	96.8843
0.03064	1.64102	1.18234	0.29227	96.8844
0.03106	1.64101	1.18234	0.29225	96.8844
0.03149	1.64106	1.18239	0.29222	96.8843
0.03193	1.64101	1.1823	0.29224	96.8845
0.03237	1.64108	1.18233	0.2922	96.8844
0.03283	1.64109	1.18238	0.29223	96.8843
0.03329	1.64108	1.18237	0.29222	96.8843
0.03376	1.64108	1.18235	0.29222	96.8843
0.03424	1.6411	1.18238	0.29222	96.8843
0.03473	1.64111	1.18239	0.29218	96.8843
0.03522	1.64109	1.18243	0.29217	96.8843
0.03573	1.64104	1.18238	0.29218	96.8844
0.03625	1.64101	1.18237	0.29218	96.8844
0.03678	1.64105	1.18234	0.29217	96.8844
0.03733	1.64107	1.18233	0.29219	96.8844
0.03788	1.6411	1.18229	0.2922	96.8844
0.03845	1.64113	1.18231	0.2922	96.8844
0.03903	1.64113	1.18226	0.29219	96.8844
0.03963	1.64112	1.1823	0.2922	96.8844
0.04024	1.64108	1.18228	0.29222	96.8844
0.04087	1.6411	1.18233	0.29224	96.8843
0.04152	1.64106	1.18229	0.29225	96.8844
0.04218	1.64104	1.18233	0.29228	96.8843
0.04286	1.64101	1.18232	0.29227	96.8844
0.04357	1.64101	1.1823	0.29228	96.8844
0.04429	1.64097	1.18231	0.29227	96.8845
0.04504	1.6409	1.1823	0.29228	96.8845
0.04582	1.64088	1.18234	0.2923	96.8845
0.04662	1.64086	1.18229	0.29228	96.8846
0.04745	1.64091	1.18225	0.29231	96.8845
0.04831	1.64088	1.18225	0.2923	96.8846
0.04921	1.64089	1.1822	0.29229	96.8846
0.05015	1.64089	1.1822	0.2923	96.8846
0.05112	1.64088	1.1822	0.29227	96.8846
0.05214	1.64088	1.18221	0.29229	96.8846
0.0532	1.6409	1.18223	0.29227	96.8846
0.05433	1.6409	1.1822	0.29229	96.8846
0.05551	1.64089	1.18218	0.29229	96.8846
0.05675	1.64089	1.18219	0.29228	96.8846
0.05808	1.64092	1.18218	0.29227	96.8846
0.05948	1.64093	1.18216	0.29226	96.8846
0.06099	1.64093	1.18217	0.29226	96.8846
0.06261	1.6409	1.18217	0.29224	96.8847
0.06435	1.6409	1.1822	0.29223	96.8847
0.06626	1.64086	1.18221	0.29221	96.8847
0.06835	1.6409	1.18225	0.2922	96.8846
0.07066	1.6409	1.18228	0.2922	96.8846
0.07327	1.64093	1.18229	0.2922	96.8846
0.07624	1.64091	1.18229	0.29217	96.8846
0.0797	1.64092	1.18229	0.29217	96.8846
0.08385	1.64091	1.18224	0.2922	96.8846
0.08904	1.64099	1.18227	0.29218	96.8846
0.09599	1.64101	1.18225	0.2922	96.8846
0.10651	1.64101	1.18223	0.29221	96.8845
0.1284	1.64102	1.18223	0.29221	96.8845
0.26177	1.64108	1.18224	0.29222	96.8845
0.49385	1.6411	1.18225	0.29223	96.8844
0.72757	1.64108	1.18225	0.29223	96.8844
0.96244	1.64111	1.18223	0.29223	96.8844
1.19911	1.64114	1.18225	0.29224	96.8844
1.43708	1.64112	1.1822	0.29224	96.8844
1.6766	1.64113	1.18222	0.29224	96.8844
1.91772	1.64111	1.18223	0.29224	96.8844
2.16021	1.64113	1.18223	0.29226	96.8844
2.4043	1.64113	1.1822	0.29225	96.8844
2.64994	1.64109	1.1822	0.29225	96.8845
2.89719	1.64109	1.18221	0.29226	96.8844
3.14604	1.64111	1.18218	0.29226	96.8845
3.39654	1.64112	1.18223	0.29226	96.8844
3.64855	1.64108	1.18222	0.29227	96.8844
3.90223	1.64108	1.18224	0.29227	96.8844
4.15747	1.64107	1.1822	0.29226	96.8845
4.4145	1.64103	1.18221	0.29227	96.8845
4.67317	1.64108	1.18221	0.29226	96.8845
4.93371	1.64111	1.18222	0.29228	96.8844
5.19599	1.64109	1.18223	0.29227	96.8844
5.45998	1.64109	1.18224	0.29228	96.8844
5.72569	1.64107	1.18223	0.29227	96.8844
5.99308	1.64108	1.18223	0.29225	96.8844
6.26258	1.6411	1.18223	0.29224	96.8844
6.53376	1.64107	1.1822	0.29224	96.8845
6.80707	1.64112	1.1822	0.29225	96.8844
7.08227	1.64108	1.18216	0.29226	96.8845
7.35927	1.64109	1.18217	0.29225	96.8845
7.63845	1.64113	1.18217	0.29225	96.8845
7.91928	1.64113	1.18215	0.29224	96.8845
8.20197	1.64113	1.18215	0.29225	96.8845
8.48676	1.64113	1.18213	0.29226	96.8845
8.77346	1.64114	1.18211	0.29226	96.8845
9.06248	1.64111	1.18214	0.29227	96.8845
9.35354	1.64107	1.18215	0.29226	96.8845
9.64653	1.64108	1.18216	0.29226	96.8845
9.94178	1.64112	1.18216	0.29225	96.8845
10.2393	1.6411	1.18216	0.29224	96.8845
10.539	1.6411	1.18214	0.29223	96.8845
10.8407	1.64109	1.18215	0.29222	96.8845
11.1448	1.64108	1.18214	0.29221	96.8846
11.4511	1.64109	1.18215	0.29222	96.8846
11.7599	1.64109	1.18216	0.29222	96.8845
12.0711	1.64107	1.18217	0.29222	96.8845
12.3847	1.64106	1.1822	0.29223	96.8845
12.7003	1.64108	1.18222	0.29225	96.8845
13.0184	1.64108	1.18224	0.29226	96.8844
13.3388	1.64108	1.18225	0.29226	96.8844
13.6619	1.64107	1.18226	0.29226	96.8844
13.9874	1.64109	1.18224	0.29226	96.8844
14.3157	1.64112	1.18223	0.29226	96.8844
14.6465	1.6411	1.1822	0.29226	96.8844
14.9796	1.64107	1.18221	0.29225	96.8845
15.3158	1.64105	1.1822	0.29225	96.8845
15.6543	1.64103	1.18217	0.29226	96.8845
15.9957	1.64105	1.18217	0.29227	96.8845
16.3398	1.64103	1.18214	0.29227	96.8846
16.6866	1.64103	1.18213	0.29226	96.8846
17.0363	1.64105	1.18215	0.29226	96.8845
17.389	1.64105	1.18214	0.29227	96.8846
17.7445	1.64105	1.18215	0.29226	96.8845
18.1029	1.64104	1.18215	0.29227	96.8845
18.4642	1.64105	1.18216	0.29228	96.8845
18.8289	1.64103	1.18217	0.29229	96.8845
19.1961	1.64106	1.18215	0.2923	96.8845
19.5665	1.64107	1.18217	0.29229	96.8845
19.94	1.64107	1.18215	0.29229	96.8845
20.317	1.64103	1.18217	0.29229	96.8845
20.6973	1.64102	1.18217	0.29229	96.8845
21.0806	1.641	1.18217	0.2923	96.8845
21.4674	1.64101	1.18215	0.29231	96.8845
21.8576	1.641	1.18215	0.29231	96.8845
22.2511	1.64096	1.18216	0.29229	96.8846
22.6485	1.64096	1.18218	0.2923	96.8846
23.0489	1.64093	1.18217	0.2923	96.8846
23.453	1.64094	1.18218	0.2923	96.8846
23.8605	1.64094	1.18219	0.29231	96.8846
24.2717	1.64092	1.18217	0.29231	96.8846
24.6867	1.64091	1.18218	0.2923	96.8846
25.1052	1.64093	1.18217	0.2923	96.8846
25.528	1.64092	1.18216	0.29229	96.8846
25.9542	1.64093	1.18215	0.29228	96.8846
26.3843	1.64091	1.18212	0.29228	96.8847
26.8186	1.64092	1.18213	0.29228	96.8847
27.2574	1.6409	1.18214	0.29227	96.8847
27.7	1.64088	1.1821	0.29229	96.8847
28.1468	1.64087	1.18208	0.29227	96.8848
28.5978	1.64084	1.18208	0.29226	96.8848
29.0529	1.64081	1.18208	0.29226	96.8849
29.5125	1.64083	1.1821	0.29225	96.8848
29.9762	1.64081	1.18208	0.29225	96.8849
30.4445	1.6408	1.18208	0.29225	96.8849
30.9172	1.64082	1.18208	0.29224	96.8849
31.395	1.6408	1.1821	0.29224	96.8849
31.8773	1.64078	1.18209	0.29224	96.8849
32.3641	1.64078	1.18208	0.29224	96.8849
32.856	1.64079	1.1821	0.29224	96.8849
33.3528	1.64081	1.18209	0.29225	96.8849
33.8545	1.64083	1.18208	0.29227	96.8848
34.3609	1.64082	1.18206	0.29228	96.8848
34.8731	1.64083	1.18206	0.29229	96.8848
35.3904	1.64083	1.18206	0.29228	96.8848
35.9128	1.64084	1.18205	0.29229	96.8848
36.4405	1.64082	1.18207	0.29229	96.8848
36.9737	1.64081	1.18207	0.29229	96.8848
37.5122	1.64079	1.18205	0.29229	96.8849
38.0563	1.64078	1.18206	0.29228	96.8849
38.6061	1.64079	1.18205	0.29228	96.8849
39.1618	1.64078	1.18205	0.29228	96.8849
39.7238	1.64079	1.18203	0.29227	96.8849
40.2911	1.6408	1.18205	0.29227	96.8849
40.8647	1.6408	1.18205	0.29228	96.8849
41.4439	1.64079	1.18204	0.29228	96.8849
42.0297	1.64081	1.18203	0.29228	96.8849
42.6217	1.64082	1.18202	0.29229	96.8849
43.2198	1.64079	1.18201	0.29227	96.8849
43.8242	1.6408	1.18199	0.29228	96.8849
44.436	1.64082	1.18201	0.29227	96.8849
45.0544	1.64083	1.182	0.29227	96.8849
45.6793	1.64084	1.18197	0.29229	96.8849
46.3116	1.64087	1.18196	0.29229	96.8849
46.9502	1.64086	1.18197	0.29228	96.8849
47.5962	1.64087	1.18197	0.29229	96.8849
48.2495	1.64088	1.18194	0.29228	96.8849
48.9099	1.64085	1.18193	0.29228	96.8849
49.5773	1.64084	1.18192	0.29228	96.885
50.253	1.64084	1.18192	0.29228	96.885
50.9363	1.64086	1.18193	0.29227	96.8849
51.6268	1.64084	1.18195	0.29228	96.8849
52.325	1.64085	1.18196	0.29227	96.8849
53.0314	1.64084	1.18198	0.29228	96.8849
53.7467	1.64085	1.18197	0.29228	96.8849
54.4697	1.64083	1.18197	0.29228	96.8849
55.2009	1.64082	1.18194	0.29229	96.885
55.9404	1.64081	1.18196	0.29229	96.885
56.6885	1.64081	1.18196	0.29229	96.8849
57.4458	1.64079	1.18196	0.29229	96.885
58.2121	1.64078	1.18197	0.29229	96.885
58.987	1.64079	1.182	0.29228	96.8849
59.7712	1.6408	1.18203	0.29228	96.8849
60.5643	1.6408	1.18202	0.29227	96.8849
61.3668	1.64081	1.18203	0.29226	96.8849
62.1784	1.64081	1.18201	0.29226	96.8849
62.9993	1.64082	1.182	0.29225	96.8849
63.8301	1.64081	1.18198	0.29226	96.8849
64.6714	1.64084	1.18197	0.29226	96.8849
65.5226	1.64085	1.18198	0.29225	96.8849
66.3831	1.64083	1.182	0.29226	96.8849
67.2542	1.64085	1.18199	0.29226	96.8849
68.136	1.64088	1.18198	0.29226	96.8849
69.0277	1.64089	1.18195	0.29225	96.8849
69.93	1.6409	1.18196	0.29226	96.8849
70.8436	1.6409	1.18195	0.29226	96.8849
71.7678	1.6409	1.18196	0.29227	96.8849
72.7031	1.64088	1.18197	0.29227	96.8849
73.6493	1.64088	1.18199	0.29226	96.8849
74.6062	1.64089	1.18197	0.29227	96.8849
75.5751	1.6409	1.18197	0.29227	96.8849
76.5558	1.6409	1.18198	0.29226	96.8849
77.5478	1.64093	1.18198	0.29229	96.8848
78.5529	1.64091	1.18196	0.29229	96.8849
79.5702	1.64091	1.18196	0.29229	96.8848
80.5985	1.64088	1.18197	0.29229	96.8849
81.6388	1.64089	1.18198	0.29229	96.8848
82.6919	1.6409	1.18198	0.2923	96.8848
83.7584	1.64088	1.18198	0.2923	96.8848
84.8371	1.64088	1.18197	0.29231	96.8848
85.9285	1.64087	1.18199	0.2923	96.8848
87.0334	1.64087	1.182	0.29229	96.8848
88.1515	1.64086	1.182	0.2923	96.8848
89.2824	1.64085	1.18199	0.29229	96.8849
90.4266	1.64084	1.18198	0.29229	96.8849
91.584	1.64084	1.18199	0.29229	96.8849
92.7563	1.64083	1.18199	0.2923	96.8849
93.9401	1.64085	1.18197	0.2923	96.8849
95.1397	1.64085	1.18195	0.2923	96.8849
96.3516	1.64086	1.18198	0.2923	96.8849
97.5792	1.64086	1.18198	0.29231	96.8849
98.8208	1.64088	1.18199	0.2923	96.8848
100.076	1.64086	1.18199	0.2923	96.8849
101.347	1.64084	1.18201	0.29231	96.8848
102.632	1.64085	1.18199	0.29232	96.8848
103.932	1.64086	1.18199	0.29232	96.8848
105.246	1.64083	1.182	0.29231	96.8849
106.577	1.64083	1.18199	0.29231	96.8849
107.922	1.64084	1.18198	0.29231	96.8849
109.282	1.64084	1.18197	0.29232	96.8849
110.657	1.64085	1.18198	0.29232	96.8849
112.048	1.64085	1.18199	0.29231	96.8849
113.455	1.64085	1.18199	0.29231	96.8848
114.877	1.64086	1.182	0.29231	96.8848
116.314	1.64086	1.182	0.2923	96.8848
117.767	1.64088	1.18201	0.2923	96.8848
119.237	1.64089	1.18202	0.29229	96.8848
120.723	1.64088	1.18202	0.29229	96.8848
122.225	1.64086	1.18202	0.2923	96.8848
123.743	1.64086	1.18203	0.29229	96.8848
125.278	1.64087	1.18204	0.29229	96.8848
126.829	1.64084	1.18205	0.29228	96.8848
128.397	1.64085	1.18206	0.29228	96.8848
129.982	1.64084	1.18206	0.29228	96.8848
131.583	1.64084	1.18206	0.29229	96.8848
133.201	1.64085	1.18206	0.29227	96.8848
134.835	1.64086	1.18206	0.29227	96.8848
136.488	1.64084	1.18207	0.29226	96.8848
138.157	1.64083	1.18209	0.29226	96.8848
139.842	1.64085	1.18208	0.29226	96.8848
141.548	1.64085	1.18207	0.29226	96.8848
143.268	1.64085	1.18207	0.29225	96.8848
145.007	1.64085	1.18206	0.29224	96.8848
146.762	1.64085	1.18206	0.29225	96.8848
148.535	1.64086	1.18207	0.29224	96.8848
150.327	1.64086	1.18209	0.29225	96.8848
152.135	1.64086	1.18208	0.29224	96.8848
153.961	1.64086	1.18208	0.29225	96.8848
155.806	1.64086	1.18208	0.29225	96.8848
157.667	1.64084	1.18206	0.29226	96.8848
159.547	1.64086	1.18207	0.29226	96.8848
161.444	1.64088	1.18207	0.29226	96.8848
163.359	1.64089	1.18208	0.29227	96.8848
165.293	1.6409	1.18208	0.29228	96.8847
167.244	1.64089	1.18206	0.29227	96.8848
169.213	1.64088	1.18206	0.29227	96.8848
171.201	1.64086	1.18207	0.29227	96.8848
173.206	1.64087	1.18207	0.29227	96.8848
175.23	1.64089	1.18207	0.29226	96.8848
177.272	1.64091	1.18205	0.29225	96.8848
179.332	1.6409	1.18205	0.29225	96.8848
181.409	1.64093	1.18204	0.29225	96.8848
183.505	1.64094	1.18206	0.29224	96.8848
185.618	1.64094	1.18205	0.29223	96.8848
187.748	1.64092	1.18205	0.29223	96.8848
189.898	1.64093	1.18204	0.29224	96.8848
192.066	1.64094	1.18206	0.29224	96.8848
194.251	1.64092	1.18204	0.29224	96.8848
196.454	1.64093	1.18204	0.29224	96.8848
198.676	1.64094	1.18204	0.29224	96.8848
200.915	1.64093	1.18205	0.29225	96.8848
203.171	1.64095	1.18203	0.29225	96.8848
205.445	1.64094	1.18203	0.29224	96.8848
207.738	1.64093	1.18203	0.29225	96.8848
210.047	1.64092	1.18202	0.29226	96.8848
212.374	1.64092	1.18201	0.29227	96.8848
214.718	1.6409	1.18201	0.29226	96.8848
217.081	1.6409	1.18201	0.29226	96.8848
219.461	1.64091	1.18202	0.29227	96.8848
221.858	1.64089	1.18202	0.29228	96.8848
224.271	1.6409	1.18201	0.29228	96.8848
226.702	1.64088	1.182	0.29228	96.8848
229.148	1.64089	1.18201	0.29228	96.8848
231.612	1.6409	1.18201	0.29228	96.8848
234.091	1.64092	1.182	0.29227	96.8848
236.586	1.64093	1.18201	0.29226	96.8848
239.1	1.64091	1.18204	0.29227	96.8848
241.631	1.64091	1.18206	0.29227	96.8848
244.176	1.64092	1.18206	0.29226	96.8848
246.735	1.64092	1.18206	0.29226	96.8848
249.311	1.64093	1.18208	0.29226	96.8847
251.903	1.64093	1.18209	0.29226	96.8847
254.51	1.64094	1.18211	0.29226	96.8847
257.132	1.64094	1.18209	0.29227	96.8847
259.772	1.64096	1.1821	0.29227	96.8847
262.427	1.64095	1.18211	0.29227	96.8847
265.094	1.64096	1.18212	0.29227	96.8846
267.778	1.64097	1.18213	0.29228	96.8846
270.475	1.64096	1.18213	0.29228	96.8846
273.185	1.64097	1.18212	0.29228	96.8846
275.911	1.64096	1.1821	0.29228	96.8847
278.647	1.64097	1.1821	0.29228	96.8846
281.399	1.64099	1.1821	0.29228	96.8846
284.165	1.64098	1.18209	0.29228	96.8846
286.942	1.64099	1.18209	0.29228	96.8846
289.735	1.64098	1.18211	0.29228	96.8846
292.54	1.64098	1.18208	0.29228	96.8847
295.354	1.64098	1.18209	0.29227	96.8847
298.182	1.64097	1.18208	0.29228	96.8847
301.021	1.64096	1.18206	0.29228	96.8847
303.875	1.64095	1.18207	0.29228	96.8847
306.74	1.64096	1.18208	0.29228	96.8847
309.615	1.64096	1.18208	0.29227	96.8847
312.5	1.64096	1.18205	0.29228	96.8847
315.398	1.64098	1.18205	0.29227	96.8847
318.309	1.64098	1.18205	0.29227	96.8847
321.229	1.64097	1.18207	0.29227	96.8847
324.16	1.64097	1.18206	0.29227	96.8847
327.1	1.64097	1.18203	0.29227	96.8847
330.048	1.64098	1.18203	0.29227	96.8847
333.01	1.64099	1.18203	0.29227	96.8847
335.98	1.64101	1.18203	0.29226	96.8847
338.959	1.64098	1.18201	0.29227	96.8847
341.948	1.64098	1.18203	0.29228	96.8847
344.944	1.64098	1.18203	0.29228	96.8847
347.952	1.64098	1.18202	0.29228	96.8847
350.968	1.64098	1.18202	0.29227	96.8847
353.99	1.64098	1.18203	0.29228	96.8847
357.019	1.64099	1.18203	0.29227	96.8847
360.059	1.64098	1.18203	0.29227	96.8847
363.107	1.64098	1.18203	0.29227	96.8847
366.16	1.64099	1.18202	0.29228	96.8847
369.22	1.641	1.18202	0.29228	96.8847
372.287	1.64099	1.18202	0.29228	96.8847
375.361	1.64101	1.18202	0.29228	96.8847
378.443	1.64101	1.18202	0.29228	96.8847
381.533	1.64102	1.18202	0.29229	96.8847
384.627	1.64102	1.18202	0.29228	96.8847
387.728	1.64102	1.18201	0.29228	96.8847
390.835	1.641	1.18201	0.29228	96.8847
393.949	1.641	1.18202	0.29229	96.8847
397.068	1.641	1.182	0.29229	96.8847
400.194	1.64101	1.18201	0.29229	96.8847
403.323	1.64102	1.182	0.29228	96.8847
406.458	1.64102	1.182	0.29228	96.8847
409.598	1.64102	1.182	0.29228	96.8847
412.742	1.64101	1.18199	0.29228	96.8847
415.891	1.64101	1.182	0.29227	96.8847
419.044	1.64101	1.18202	0.29227	96.8847
422.207	1.641	1.18201	0.29227	96.8847
425.373	1.64099	1.18201	0.29227	96.8847
428.544	1.64099	1.18201	0.29227	96.8847
431.715	1.64098	1.18201	0.29227	96.8847
434.889	1.64097	1.18202	0.29228	96.8847
438.068	1.64096	1.182	0.29228	96.8848
441.256	1.64097	1.18199	0.29228	96.8848
444.448	1.64097	1.18199	0.29228	96.8848
447.638	1.64098	1.182	0.29227	96.8847
450.832	1.64098	1.18199	0.29227	96.8848
454.029	1.64097	1.182	0.29227	96.8847
457.234	1.64099	1.18199	0.29227	96.8847
460.439	1.64099	1.18199	0.29227	96.8847
463.649	1.64099	1.18198	0.29227	96.8848
466.862	1.64098	1.18197	0.29228	96.8848
470.077	1.64097	1.18199	0.29228	96.8848
473.297	1.64095	1.18199	0.29228	96.8848
476.516	1.64096	1.18199	0.29228	96.8848
479.742	1.64096	1.182	0.29227	96.8848
482.968	1.64097	1.18201	0.29227	96.8847
486.196	1.64097	1.18199	0.29227	96.8848
489.429	1.64099	1.18198	0.29227	96.8848
492.661	1.64099	1.18199	0.29226	96.8848
495.897	1.64097	1.18198	0.29225	96.8848
499.132	1.64097	1.18198	0.29225	96.8848
502.374	1.64096	1.18199	0.29225	96.8848
505.616	1.64096	1.18198	0.29225	96.8848
508.86	1.64094	1.18198	0.29225	96.8848
512.105	1.64095	1.18198	0.29226	96.8848
515.353	1.64097	1.18197	0.29226	96.8848
518.602	1.64096	1.18197	0.29226	96.8848
521.854	1.64096	1.18198	0.29226	96.8848
525.104	1.64098	1.18198	0.29226	96.8848
528.361	1.641	1.18197	0.29226	96.8848
531.617	1.641	1.18198	0.29226	96.8848
534.87	1.64099	1.18197	0.29225	96.8848
538.131	1.64099	1.18198	0.29226	96.8848
541.39	1.64098	1.18198	0.29226	96.8848
544.652	1.64098	1.18198	0.29226	96.8848
547.916	1.64098	1.18199	0.29226	96.8848
551.18	1.64097	1.18198	0.29226	96.8848
554.445	1.64099	1.18198	0.29226	96.8848
557.711	1.64098	1.18199	0.29226	96.8848
560.98	1.641	1.18198	0.29224	96.8848
564.251	1.641	1.18197	0.29224	96.8848
567.523	1.641	1.18196	0.29225	96.8848
570.796	1.64102	1.18199	0.29224	96.8847
574.067	1.64101	1.18199	0.29225	96.8847
577.339	1.641	1.18201	0.29225	96.8847
580.612	1.64101	1.18201	0.29224	96.8847
583.889	1.64101	1.182	0.29224	96.8847
587.165	1.641	1.18199	0.29224	96.8848
590.444	1.64099	1.182	0.29223	96.8848
593.724	1.64097	1.18201	0.29223	96.8848
597.006	1.64099	1.182	0.29223	96.8848
600.284	1.64099	1.18201	0.29222	96.8848
603.565	1.641	1.18201	0.29222	96.8848
606.844	1.64101	1.18202	0.29222	96.8848
610.124	1.64101	1.18202	0.29221	96.8848
613.406	1.64099	1.18203	0.2922	96.8848
616.691	1.64099	1.18203	0.2922	96.8848
619.977	1.64098	1.18204	0.29221	96.8848
623.261	1.64099	1.18205	0.29221	96.8848
626.546	1.64098	1.18203	0.29221	96.8848
629.831	1.64098	1.18203	0.29221	96.8848
633.117	1.64098	1.18203	0.2922	96.8848
636.403	1.64098	1.18203	0.2922	96.8848
639.692	1.64097	1.18204	0.2922	96.8848
642.978	1.64097	1.18204	0.2922	96.8848
646.265	1.64097	1.18204	0.2922	96.8848
649.553	1.64097	1.18203	0.2922	96.8848
652.844	1.64097	1.18204	0.2922	96.8848
656.137	1.64096	1.18204	0.2922	96.8848
659.426	1.64096	1.18204	0.2922	96.8848
662.714	1.64095	1.18204	0.2922	96.8848
666.004	1.64097	1.18204	0.2922	96.8848
669.294	1.64098	1.18204	0.2922	96.8848
672.584	1.64097	1.18202	0.2922	96.8848
675.874	1.64097	1.18203	0.2922	96.8848
679.163	1.64097	1.18205	0.29221	96.8848
682.455	1.64097	1.18202	0.29221	96.8848
685.748	1.64096	1.18202	0.29222	96.8848
689.038	1.64096	1.18202	0.29222	96.8848
692.331	1.64095	1.18202	0.29223	96.8848
695.625	1.64094	1.18203	0.29223	96.8848
698.922	1.64094	1.18204	0.29223	96.8848
702.215	1.64094	1.18205	0.29223	96.8848
705.51	1.64093	1.18204	0.29223	96.8848
708.804	1.64093	1.18203	0.29223	96.8848
712.094	1.64092	1.18204	0.29223	96.8848
715.39	1.64093	1.18204	0.29223	96.8848
718.684	1.64093	1.18205	0.29224	96.8848
721.98	1.64092	1.18204	0.29223	96.8848
725.276	1.64093	1.18205	0.29224	96.8848
728.572	1.64093	1.18205	0.29223	96.8848
731.868	1.64093	1.18206	0.29223	96.8848
735.162	1.64094	1.18206	0.29224	96.8848
738.455	1.64093	1.18205	0.29225	96.8848
741.755	1.64092	1.18205	0.29224	96.8848
745.049	1.64093	1.18204	0.29224	96.8848
748.345	1.64093	1.18203	0.29224	96.8848
751.638	1.64093	1.18204	0.29224	96.8848
754.932	1.64092	1.18204	0.29223	96.8848
758.229	1.64091	1.18202	0.29223	96.8848
761.527	1.6409	1.18201	0.29222	96.8849
764.822	1.6409	1.18201	0.29222	96.8849
768.121	1.6409	1.18201	0.29222	96.8849
771.418	1.64091	1.182	0.29221	96.8849
774.719	1.6409	1.182	0.29222	96.8849
778.017	1.6409	1.18201	0.29222	96.8849
781.314	1.64089	1.182	0.29222	96.8849
784.612	1.6409	1.182	0.29222	96.8849
787.911	1.64089	1.18201	0.29222	96.8849
791.207	1.6409	1.18201	0.29222	96.8849
794.505	1.6409	1.182	0.29221	96.8849
797.802	1.6409	1.182	0.29221	96.8849
801.098	1.64091	1.182	0.29221	96.8849
804.396	1.64092	1.18199	0.29221	96.8849
807.697	1.6409	1.182	0.29221	96.8849
810.995	1.6409	1.18201	0.29221	96.8849
814.296	1.64087	1.18201	0.29221	96.8849
817.593	1.64087	1.18201	0.29221	96.8849
820.891	1.64087	1.18201	0.29221	96.8849
824.187	1.64089	1.18201	0.29221	96.8849
827.487	1.64088	1.18201	0.29221	96.8849
830.784	1.64087	1.18201	0.29221	96.8849
834.081	1.64088	1.18201	0.2922	96.8849
837.382	1.64086	1.18201	0.2922	96.8849
840.68	1.64088	1.18201	0.2922	96.8849
843.979	1.64088	1.18201	0.2922	96.8849
847.278	1.64089	1.18201	0.2922	96.8849
850.575	1.64089	1.182	0.2922	96.8849
853.874	1.64089	1.182	0.2922	96.8849
857.174	1.64088	1.18202	0.2922	96.8849
860.476	1.64087	1.18203	0.2922	96.8849
863.774	1.64088	1.18203	0.2922	96.8849
867.072	1.6409	1.18202	0.2922	96.8849
870.373	1.64088	1.18202	0.2922	96.8849
873.674	1.64088	1.18201	0.2922	96.8849
876.975	1.64089	1.18201	0.29219	96.8849
880.278	1.64088	1.18202	0.29219	96.8849
883.58	1.64088	1.18201	0.29219	96.8849
886.88	1.64089	1.18201	0.29219	96.8849
890.179	1.6409	1.18201	0.29219	96.8849
893.48	1.64088	1.18202	0.29219	96.8849
896.777	1.64088	1.182	0.29219	96.8849
900.078	1.64089	1.18201	0.29219	96.8849
903.379	1.6409	1.18201	0.29219	96.8849
906.678	1.6409	1.18201	0.29218	96.8849
909.977	1.64089	1.18202	0.29218	96.8849
913.278	1.64089	1.18203	0.29218	96.8849
916.576	1.64089	1.18202	0.29218	96.8849
919.876	1.6409	1.18202	0.29217	96.8849
923.177	1.64089	1.18202	0.29218	96.8849
926.478	1.64089	1.18202	0.29218	96.8849
929.777	1.64088	1.18202	0.29218	96.8849
933.077	1.64088	1.18202	0.29218	96.8849
936.376	1.64089	1.182	0.29218	96.8849
939.678	1.64088	1.182	0.29218	96.8849
942.977	1.64089	1.182	0.29218	96.8849
946.278	1.6409	1.182	0.29218	96.8849
949.578	1.64092	1.18199	0.29217	96.8849
952.879	1.64091	1.18199	0.29217	96.8849
956.183	1.64092	1.182	0.29217	96.8849
959.48	1.64091	1.182	0.29217	96.8849
962.781	1.64092	1.18201	0.29217	96.8849
966.083	1.64092	1.18202	0.29217	96.8849
969.384	1.64092	1.18202	0.29217	96.8849
972.688	1.64093	1.18202	0.29217	96.8849
975.989	1.64093	1.18203	0.29217	96.8849
979.286	1.64092	1.18202	0.29218	96.8849
982.588	1.64092	1.18202	0.29218	96.8849
985.888	1.64093	1.18202	0.29217	96.8849
989.191	1.64091	1.18202	0.29217	96.8849
992.493	1.6409	1.18202	0.29217	96.8849
995.795	1.64092	1.18202	0.29217	96.8849
999.097	1.64092	1.18202	0.29217	96.8849
1002.4	1.64092	1.18202	0.29217	96.8849
1005.7	1.64092	1.18203	0.29217	96.8849
1009	1.64092	1.18202	0.29217	96.8849
1012.3	1.64093	1.18203	0.29217	96.8849
1015.6	1.64092	1.18203	0.29217	96.8849
1018.9	1.64093	1.18203	0.29217	96.8849
1022.21	1.64093	1.18204	0.29217	96.8849
1025.51	1.64094	1.18205	0.29217	96.8848
1028.81	1.64093	1.18206	0.29217	96.8848
1032.12	1.64093	1.18207	0.29217	96.8848
1035.42	1.64094	1.18207	0.29217	96.8848
1038.72	1.64094	1.18207	0.29217	96.8848
1042.02	1.64093	1.18207	0.29217	96.8848
1045.32	1.64093	1.18207	0.29217	96.8848
1048.62	1.64093	1.18207	0.29216	96.8848
1051.92	1.64094	1.18206	0.29216	96.8848
1055.23	1.64094	1.18207	0.29216	96.8848
1058.52	1.64095	1.18206	0.29217	96.8848
1061.83	1.64095	1.18206	0.29217	96.8848
1065.13	1.64094	1.18205	0.29217	96.8848
1068.43	1.64095	1.18205	0.29216	96.8848
1071.73	1.64095	1.18205	0.29215	96.8849
1075.03	1.64094	1.18204	0.29216	96.8849
1078.33	1.64094	1.18205	0.29216	96.8849
1081.63	1.64093	1.18204	0.29216	96.8849
1084.93	1.64094	1.18204	0.29216	96.8849
1088.24	1.64095	1.18204	0.29217	96.8848
1091.54	1.64094	1.18205	0.29217	96.8848
1094.84	1.64094	1.18204	0.29217	96.8848
1098.14	1.64094	1.18204	0.29217	96.8849
1101.45	1.64095	1.18205	0.29217	96.8848
1104.74	1.64096	1.18205	0.29217	96.8848
1108.04	1.64095	1.18206	0.29217	96.8848
1111.34	1.64096	1.18205	0.29217	96.8848
1114.65	1.64097	1.18205	0.29217	96.8848
1117.95	1.64097	1.18204	0.29217	96.8848
1121.25	1.64097	1.18204	0.29217	96.8848
1124.54	1.64098	1.18204	0.29216	96.8848
1127.84	1.64098	1.18204	0.29216	96.8848
1131.14	1.64098	1.18204	0.29216	96.8848
1134.44	1.64098	1.18205	0.29217	96.8848
1137.74	1.641	1.18205	0.29216	96.8848
1141.04	1.64099	1.18205	0.29217	96.8848
1144.34	1.64099	1.18205	0.29216	96.8848
1147.65	1.64099	1.18206	0.29216	96.8848
1150.94	1.64102	1.18205	0.29216	96.8848
1154.24	1.64101	1.18205	0.29216	96.8848
1157.54	1.641	1.18205	0.29216	96.8848
1160.84	1.641	1.18205	0.29216	96.8848
1164.14	1.641	1.18206	0.29216	96.8848
1167.45	1.64099	1.18205	0.29216	96.8848
1170.75	1.64099	1.18206	0.29216	96.8848
1174.05	1.64099	1.18206	0.29215	96.8848
1177.35	1.64099	1.18207	0.29215	96.8848
1180.65	1.641	1.18209	0.29215	96.8848
1183.95	1.641	1.18209	0.29215	96.8848
1187.25	1.641	1.18208	0.29215	96.8848
1190.55	1.64101	1.18207	0.29215	96.8848
1193.85	1.641	1.18209	0.29215	96.8848
1197.15	1.641	1.1821	0.29215	96.8847
1200	1.64099	1.1821	0.29216	96.8847
1200	1.64099	1.1821	0.29216	96.8847
1229.48	1.64099	1.1821	0.29216	96.8847
1270.83	1.64099	1.1821	0.29216	96.8847
1324.52	1.64099	1.1821	0.29216	96.8847
1389.8	1.64099	1.1821	0.29216	96.8847
1465.99	1.64099	1.1821	0.29216	96.8847
1552.26	1.64099	1.1821	0.29216	96.8847
1647.92	1.64099	1.1821	0.29216	96.8847
1752.83	1.64099	1.1821	0.29216	96.8847
1867.62	1.64099	1.1821	0.29216	96.8847
1993.67	1.64099	1.1821	0.29216	96.8847
2133.04	1.64099	1.1821	0.29216	96.8847
2288.7	1.64099	1.1821	0.29216	96.8847
2400	1.64099	1.1821	0.29216	96.8847

## Sheet: Fig 4a,b
	panel a				panel b
time	Ru3Ru2OH2	Ru3Ru3OH2	Ru3Ru4O	Ru3Ru3OOH	Ru2Ru3OH2	Ru2Ru5O	Ru2Ru4OO
s	per diad	per diad	per diad	per diad	per diad	per diad	per diad
0	0	0	0	0	0	0	0
0.000169938	0	0	0	0	0	0	0
0.000340247	0	0	0	0	0	0	0
0.000510859	0	0	0	0	0	0	0
0.000681856	0	0	0	0	0	0	0
0.000853262	0	0	0	0	0	0	0
0.00103	1.66054e-09	0	0	0	0	0	0
0.0012	1.66054e-09	0	0	0	0	0	0
0.00137	1.66054e-09	0	0	0	0	0	0
0.00154	1.66054e-09	0	0	0	1.66054e-09	0	0
0.00172	1.66054e-09	0	0	0	1.66054e-09	0	0
0.00189	1.66054e-09	0	0	0	1.66054e-09	0	0
0.00206	1.66054e-09	0	0	0	3.32108e-09	0	0
0.00224	1.66054e-09	0	0	0	3.32108e-09	0	0
0.00241	1.66054e-09	0	0	0	3.32108e-09	0	0
0.00259	1.66054e-09	0	0	0	3.32108e-09	0	0
0.00277	1.66054e-09	0	0	0	3.32108e-09	0	0
0.00294	1.66054e-09	0	0	0	3.32108e-09	0	0
0.00312	1.66054e-09	0	0	0	3.32108e-09	0	0
0.0033	1.66054e-09	0	0	0	3.32108e-09	0	0
0.00348	1.66054e-09	0	0	0	3.32108e-09	0	0
0.00366	1.66054e-09	0	0	0	3.32108e-09	0	0
0.00384	1.66054e-09	0	0	0	3.32108e-09	0	0
0.00402	1.66054e-09	0	0	0	3.32108e-09	0	0
0.0042	1.66054e-09	0	0	0	3.32108e-09	0	0
0.00438	1.66054e-09	0	0	0	3.32108e-09	0	0
0.00456	1.66054e-09	0	0	0	3.32108e-09	0	0
0.00475	1.66054e-09	0	0	0	3.32108e-09	0	0
0.00493	1.66054e-09	0	0	0	3.32108e-09	0	0
0.00511	3.32108e-09	0	0	0	3.32108e-09	0	0
0.0053	4.98162e-09	0	0	0	3.32108e-09	0	0
0.00548	4.98162e-09	0	0	0	3.32108e-09	0	0
0.00567	4.98162e-09	0	0	0	3.32108e-09	0	0
0.00586	4.98162e-09	0	0	0	3.32108e-09	0	0
0.00605	6.64216e-09	0	0	0	3.32108e-09	0	0
0.00624	6.64216e-09	0	0	0	3.32108e-09	0	0
0.00643	6.64216e-09	0	0	0	3.32108e-09	0	0
0.00662	6.64216e-09	0	0	0	3.32108e-09	0	0
0.00681	6.64216e-09	0	0	0	3.32108e-09	0	0
0.007	6.64216e-09	0	0	0	3.32108e-09	0	0
0.00719	6.64216e-09	0	0	0	4.98162e-09	0	0
0.00739	6.64216e-09	0	0	0	4.98162e-09	0	0
0.00758	6.64216e-09	0	0	0	4.98162e-09	0	0
0.00778	8.30269e-09	0	0	0	4.98162e-09	0	0
0.00797	8.30269e-09	0	0	0	4.98162e-09	0	0
0.00817	8.30269e-09	0	0	0	4.98162e-09	0	0
0.00837	8.30269e-09	0	0	0	4.98162e-09	0	0
0.00857	8.30269e-09	0	0	0	4.98162e-09	0	0
0.00877	8.30269e-09	0	0	0	4.98162e-09	0	0
0.00897	8.30269e-09	0	0	0	4.98162e-09	0	0
0.00917	8.30269e-09	0	0	0	4.98162e-09	0	0
0.00938	8.30269e-09	0	0	0	4.98162e-09	0	0
0.00958	9.96323e-09	0	0	0	4.98162e-09	0	0
0.00979	9.96323e-09	0	0	0	4.98162e-09	0	0
0.00999	1.32843e-08	0	0	0	4.98162e-09	0	0
0.0102	1.32843e-08	0	0	0	4.98162e-09	0	0
0.01041	1.66054e-08	0	0	0	8.30269e-09	0	0
0.01062	1.82659e-08	0	0	0	8.30269e-09	0	0
0.01083	1.82659e-08	0	0	0	8.30269e-09	0	0
0.01105	1.82659e-08	0	0	0	9.96323e-09	0	0
0.01126	1.99265e-08	0	0	0	9.96323e-09	0	0
0.01148	1.99265e-08	0	0	0	9.96323e-09	0	0
0.01169	2.32475e-08	0	0	0	9.96323e-09	0	0
0.01191	2.65686e-08	0	0	0	9.96323e-09	0	0
0.01213	2.65686e-08	0	0	0	9.96323e-09	0	0
0.01235	2.65686e-08	0	0	0	1.16238e-08	0	0
0.01257	2.65686e-08	0	0	0	1.16238e-08	0	0
0.0128	2.65686e-08	0	0	0	1.16238e-08	0	0
0.01302	2.65686e-08	0	0	0	1.16238e-08	0	0
0.01325	2.65686e-08	0	0	0	1.16238e-08	0	0
0.01348	2.82292e-08	0	0	0	1.32843e-08	0	0
0.01371	2.82292e-08	0	0	0	1.66054e-08	0	0
0.01394	2.98897e-08	0	0	0	1.82659e-08	0	0
0.01417	2.98897e-08	0	0	0	1.82659e-08	0	0
0.01441	3.15502e-08	0	0	0	1.82659e-08	0	0
0.01464	3.15502e-08	0	0	0	1.82659e-08	0	0
0.01488	3.15502e-08	0	0	0	1.99265e-08	0	0
0.01512	3.15502e-08	0	0	0	2.1587e-08	0	0
0.01536	3.15502e-08	0	0	0	2.1587e-08	0	0
0.01561	3.32108e-08	0	0	0	2.32475e-08	0	0
0.01585	3.48713e-08	0	0	0	2.32475e-08	0	0
0.0161	3.48713e-08	0	0	0	2.32475e-08	0	0
0.01635	3.48713e-08	0	0	0	2.32475e-08	0	0
0.0166	3.48713e-08	0	0	0	2.32475e-08	0	0
0.01685	3.65319e-08	0	0	0	2.49081e-08	0	0
0.01711	3.81924e-08	0	0	0	2.49081e-08	0	0
0.01737	3.98529e-08	0	0	0	2.49081e-08	0	0
0.01763	4.15135e-08	0	0	0	2.49081e-08	0	0
0.01789	4.3174e-08	0	0	0	2.82292e-08	0	0
0.01815	4.3174e-08	0	0	0	2.82292e-08	0	0
0.01842	4.3174e-08	0	0	0	2.82292e-08	0	0
0.01869	4.3174e-08	0	0	0	2.98897e-08	0	0
0.01896	4.3174e-08	0	0	0	3.15502e-08	0	0
0.01923	4.3174e-08	0	0	0	3.32108e-08	0	0
0.01951	4.3174e-08	0	0	0	3.32108e-08	0	0
0.01979	4.3174e-08	0	0	0	3.48713e-08	0	0
0.02007	4.3174e-08	0	0	0	3.48713e-08	0	0
0.02036	4.48345e-08	0	0	0	3.65319e-08	0	0
0.02064	4.48345e-08	0	0	0	3.65319e-08	0	0
0.02093	4.48345e-08	0	0	0	3.65319e-08	0	0
0.02123	4.48345e-08	0	0	0	3.65319e-08	0	0
0.02152	4.64951e-08	0	0	0	3.65319e-08	0	0
0.02182	4.81556e-08	0	0	0	3.65319e-08	0	0
0.02213	4.81556e-08	0	0	0	3.65319e-08	0	0
0.02243	4.81556e-08	0	0	0	3.81924e-08	0	0
0.02274	5.14767e-08	0	0	0	3.98529e-08	0	0
0.02306	5.14767e-08	0	0	0	4.15135e-08	0	0
0.02337	5.14767e-08	0	0	0	4.48345e-08	0	0
0.02369	5.14767e-08	0	0	0	4.64951e-08	0	0
0.02402	5.14767e-08	0	0	0	5.14767e-08	0	0
0.02434	5.31372e-08	0	0	0	5.31372e-08	0	0
0.02468	5.47978e-08	0	0	0	5.31372e-08	0	0
0.02501	5.47978e-08	0	0	0	5.31372e-08	0	0
0.02535	5.64583e-08	0	0	0	5.64583e-08	0	0
0.0257	5.64583e-08	0	0	0	5.64583e-08	0	0
0.02605	5.81189e-08	0	0	0	5.81189e-08	0	0
0.0264	5.97794e-08	0	0	0	5.81189e-08	0	0
0.02676	5.97794e-08	0	0	0	6.14399e-08	0	0
0.02712	6.31005e-08	0	0	0	6.14399e-08	0	0
0.02749	6.31005e-08	0	0	0	6.14399e-08	0	0
0.02786	6.31005e-08	0	0	0	6.14399e-08	0	0
0.02824	6.4761e-08	0	0	0	6.31005e-08	0	0
0.02863	6.80821e-08	0	0	0	6.31005e-08	0	0
0.02902	6.97426e-08	0	0	0	6.31005e-08	0	0
0.02941	7.14032e-08	0	0	0	6.31005e-08	0	0
0.02982	7.14032e-08	0	0	0	6.64216e-08	0	0
0.03022	7.14032e-08	0	0	0	6.64216e-08	0	0
0.03064	7.14032e-08	0	0	0	6.64216e-08	0	0
0.03106	7.14032e-08	0	0	0	6.80821e-08	0	0
0.03149	7.30637e-08	0	0	0	7.30637e-08	0	0
0.03193	7.30637e-08	0	0	0	7.80453e-08	0	0
0.03237	7.47242e-08	0	0	0	7.80453e-08	0	0
0.03283	7.63848e-08	0	0	0	7.97059e-08	0	0
0.03329	7.63848e-08	0	0	0	7.97059e-08	0	0
0.03376	7.63848e-08	0	0	0	8.6348e-08	0	0
0.03424	7.80453e-08	0	0	0	8.6348e-08	0	0
0.03473	7.97059e-08	0	0	0	9.13296e-08	0	0
0.03522	8.80086e-08	0	0	0	9.46507e-08	0	0
0.03573	8.96691e-08	0	0	0	9.46507e-08	0	0
0.03625	8.96691e-08	0	0	0	9.63113e-08	0	0
0.03678	9.13296e-08	0	0	0	9.79718e-08	0	0
0.03733	9.29902e-08	0	0	0	9.79718e-08	0	0
0.03788	9.29902e-08	0	0	0	1.01293e-07	0	0
0.03845	9.29902e-08	0	0	0	1.04614e-07	0	0
0.03903	9.46507e-08	0	0	0	1.09596e-07	0	0
0.03963	9.46507e-08	0	0	0	1.11256e-07	0	0
0.04024	9.46507e-08	0	0	0	1.12917e-07	0	0
0.04087	9.46507e-08	0	0	0	1.16238e-07	0	0
0.04152	9.63113e-08	0	0	0	1.17898e-07	0	0
0.04218	9.63113e-08	0	0	0	1.29522e-07	0	0
0.04286	9.79718e-08	0	0	0	1.31183e-07	0	0
0.04357	9.79718e-08	0	0	0	1.41146e-07	0	0
0.04429	1.01293e-07	0	0	0	1.47788e-07	0	0
0.04504	1.01293e-07	0	0	0	1.5443e-07	0	0
0.04582	1.01293e-07	0	0	0	1.61072e-07	0	0
0.04662	1.02953e-07	0	0	0	1.66054e-07	0	0
0.04745	1.06274e-07	0	0	0	1.69375e-07	0	0
0.04831	1.09596e-07	0	0	0	1.72696e-07	0	0
0.04921	1.09596e-07	0	0	0	1.77678e-07	0	0
0.05015	1.09596e-07	0	0	0	1.77678e-07	0	0
0.05112	1.09596e-07	0	0	0	1.8432e-07	0	0
0.05214	1.09596e-07	0	0	0	1.95944e-07	0	0
0.0532	1.12917e-07	0	0	0	2.04246e-07	0	0
0.05433	1.14577e-07	0	0	0	2.1587e-07	0	0
0.05551	1.16238e-07	0	0	0	2.20852e-07	0	0
0.05675	1.17898e-07	0	0	0	2.24173e-07	0	0
0.05808	1.17898e-07	0	0	0	2.34136e-07	0	0
0.05948	1.19559e-07	0	0	0	2.40778e-07	0	0
0.06099	1.19559e-07	0	0	0	2.50741e-07	0	0
0.06261	1.19559e-07	0	0	0	2.67347e-07	0	0
0.06435	1.19559e-07	0	0	0	2.72328e-07	0	0
0.06626	1.21219e-07	0	0	0	2.88934e-07	0	0
0.06835	1.21219e-07	0	0	0	2.98897e-07	0	0
0.07066	1.21219e-07	0	0	0	3.10521e-07	0	0
0.07327	1.21219e-07	0	0	0	3.27126e-07	0	0
0.07624	1.2288e-07	0	0	0	3.60337e-07	0	0
0.0797	1.2288e-07	0	0	0	3.80263e-07	0	0
0.08385	1.2288e-07	0	0	0	4.3174e-07	0	0
0.08904	1.26201e-07	0	0	0	4.9152e-07	0	0
0.09599	1.27861e-07	0	0	0	5.39675e-07	0	0
0.10651	1.27861e-07	0	0	0	6.24363e-07	0	0
0.1284	1.31183e-07	0	0	0	8.16985e-07	0	0
0.26177	1.31183e-07	3.32108e-09	0	0	1.91792e-06	0	0
0.49385	1.31183e-07	2.32475e-08	0	0	3.69304e-06	0	0
0.72757	1.31183e-07	5.97794e-08	0	0	5.58937e-06	0	0
0.96244	1.31183e-07	1.07935e-07	0	0	7.40932e-06	0	0
1.19911	1.31183e-07	1.80999e-07	0	0	9.2957e-06	0	0
1.43708	1.31183e-07	2.64026e-07	0	0	1.1197e-05	0	0
1.6766	1.31183e-07	3.71961e-07	0	0	1.3002e-05	0	0
1.91772	1.31183e-07	5.04804e-07	1.66054e-09	0	1.48568e-05	0	0
2.16021	1.31183e-07	6.57573e-07	3.32108e-09	0	1.66253e-05	0	0
2.4043	1.31183e-07	8.10343e-07	4.98162e-09	0	1.84237e-05	0	0
2.64994	1.31183e-07	9.79718e-07	9.96323e-09	0	2.0247e-05	0	0
2.89719	1.31183e-07	1.18562e-06	9.96323e-09	0	2.20021e-05	0	0
3.14604	1.31183e-07	1.38821e-06	1.32843e-08	0	2.38121e-05	0	0
3.39654	1.31183e-07	1.60076e-06	1.99265e-08	0	2.56935e-05	0	0
3.64855	1.31183e-07	1.8349e-06	2.1587e-08	0	2.73707e-05	0	0
3.90223	1.31183e-07	2.07899e-06	2.65686e-08	0	2.90528e-05	0	0
4.15747	1.31183e-07	2.36295e-06	2.65686e-08	0	3.08428e-05	0	0
4.4145	1.31183e-07	2.65354e-06	3.65319e-08	0	3.26777e-05	0	0
4.67317	1.31183e-07	2.95244e-06	3.98529e-08	0	3.44595e-05	0	0
4.93371	1.31183e-07	3.27458e-06	5.14767e-08	0	3.61881e-05	0	0
5.19599	1.31183e-07	3.62662e-06	5.81189e-08	0	3.78918e-05	0	0
5.45998	1.31183e-07	3.97533e-06	6.80821e-08	0	3.95574e-05	0	0
5.72569	1.31183e-07	4.36224e-06	7.47242e-08	0	4.1364e-05	0	0
5.99308	1.31183e-07	4.7508e-06	8.80086e-08	0	4.3096e-05	0	0
6.26258	1.31183e-07	5.1676e-06	1.11256e-07	0	4.48113e-05	0	0
6.53376	1.31183e-07	5.60432e-06	1.19559e-07	0	4.65233e-05	0	0
6.80707	1.31183e-07	6.04104e-06	1.41146e-07	0	4.82951e-05	0	0
7.08227	1.31183e-07	6.49603e-06	1.51109e-07	0	4.99789e-05	0	0
7.35927	1.31183e-07	7.03404e-06	1.64393e-07	0	5.1749e-05	0	0
7.63845	1.31183e-07	7.58866e-06	1.8598e-07	0	5.34378e-05	0	0
7.91928	1.31183e-07	8.08848e-06	2.05907e-07	0	5.51399e-05	0	0
8.20197	1.31183e-07	8.60159e-06	2.29154e-07	0	5.67938e-05	0	0
8.48676	1.31183e-07	9.14625e-06	2.49081e-07	0	5.84875e-05	0	0
8.77346	1.31183e-07	9.74902e-06	2.78971e-07	0	6.01979e-05	0	0
9.06248	1.31183e-07	1.03418e-05	2.98897e-07	0	6.19298e-05	0	0
9.35354	1.31183e-07	1.09529e-05	3.32108e-07	0	6.35239e-05	0	0
9.64653	1.31183e-07	1.15341e-05	3.73621e-07	0	6.51446e-05	0	0
9.94178	1.31183e-07	1.22116e-05	4.18456e-07	0	6.68483e-05	0	0
10.2393	1.31183e-07	1.28924e-05	4.51667e-07	0	6.85636e-05	0	0
10.539	1.31183e-07	1.36231e-05	4.78235e-07	0	7.02292e-05	0	0
10.8407	1.31183e-07	1.4357e-05	5.2307e-07	0	7.18582e-05	0	0
11.1448	1.31183e-07	1.50943e-05	5.69565e-07	0	7.34539e-05	0	0
11.4511	1.31183e-07	1.57818e-05	6.12739e-07	0	7.50862e-05	0	0
11.7599	1.31183e-07	1.6529e-05	6.40968e-07	0	7.67385e-05	0	0
12.0711	1.31183e-07	1.7336e-05	6.95766e-07	0	7.83492e-05	0	0
12.3847	1.31183e-07	1.81912e-05	7.42261e-07	0	7.99267e-05	0	0
12.7003	1.31183e-07	1.90148e-05	8.0038e-07	0	8.15873e-05	0	0
13.0184	1.31183e-07	1.98517e-05	8.60159e-07	0	8.3203e-05	0	0
13.3388	1.31183e-07	2.08115e-05	9.2492e-07	0	8.48867e-05	0	0
13.6619	1.31183e-07	2.17082e-05	9.83039e-07	0	8.64709e-05	0	0
13.9874	1.31183e-07	2.2668e-05	1.04946e-06	0	8.80849e-05	0	0
14.3157	1.31183e-07	2.36278e-05	1.12585e-06	0	8.96259e-05	0	0
14.6465	1.31183e-07	2.46441e-05	1.20389e-06	0	9.11985e-05	0	0
14.9796	1.31183e-07	2.56553e-05	1.28194e-06	0	9.27062e-05	0	0
15.3158	1.31183e-07	2.67131e-05	1.35002e-06	0	9.42422e-05	0	0
15.6543	1.31183e-07	2.78423e-05	1.40814e-06	0	9.58828e-05	0	0
15.9957	1.31183e-07	2.89565e-05	1.51109e-06	0	9.74471e-05	0	0
16.3398	1.31183e-07	3.01056e-05	1.59412e-06	0	9.8993e-05	0	0
16.6866	1.31183e-07	3.12414e-05	1.68711e-06	0	0.000100449	0	0
17.0363	1.31183e-07	3.24104e-05	1.77512e-06	0	0.000101924	0	0
17.389	1.31183e-07	3.36126e-05	1.87807e-06	0	0.00010349	0	0
17.7445	1.31183e-07	3.48962e-05	1.99597e-06	0	0.000104855	0	0
18.1029	1.31183e-07	3.61283e-05	2.12715e-06	0	0.000106374	0	0
18.4642	1.31183e-07	3.74086e-05	2.26664e-06	0	0.000107903	0	0
18.8289	1.31183e-07	3.87138e-05	2.41774e-06	0	0.000109366	0	0
19.1961	1.31183e-07	4.00123e-05	2.56387e-06	0	0.000110941	0	0
19.5665	1.31183e-07	4.14122e-05	2.71498e-06	0	0.000112437	0	0
19.94	1.31183e-07	4.28386e-05	2.85115e-06	0	0.000113978	0	0
20.317	1.31183e-07	4.42251e-05	2.98565e-06	0	0.000115437	0	0
20.6973	1.31183e-07	4.55668e-05	3.12181e-06	0	0.000116894	0	0
21.0806	1.31183e-07	4.70696e-05	3.27292e-06	0	0.00011834	0	0
21.4674	1.31183e-07	4.8501e-05	3.43732e-06	0	0.000119851	0	0
21.8576	1.31183e-07	5.00569e-05	3.62994e-06	0	0.000121297	0	0
22.2511	1.31183e-07	5.1573e-05	3.79267e-06	0	0.00012283	0	0
22.6485	1.31183e-07	5.31572e-05	3.99194e-06	0	0.000124283	0	0
23.0489	1.31183e-07	5.48028e-05	4.23603e-06	0	0.000125718	0	0
23.453	1.31183e-07	5.64268e-05	4.43198e-06	0	0.000127108	0	0
23.8605	1.31183e-07	5.80707e-05	4.66611e-06	0	0.000128497	0	0
24.2717	1.31183e-07	5.97395e-05	4.88863e-06	0	0.000129891	0	0
24.6867	1.31183e-07	6.13536e-05	5.1211e-06	0	0.000131219	0	0
25.1052	1.31183e-07	6.30307e-05	5.37018e-06	0	0.00013265	0	0
25.528	1.31183e-07	6.48092e-05	5.61594e-06	0	0.000134095	0	0
25.9542	1.31183e-07	6.65561e-05	5.90322e-06	0	0.000135488	0	0
26.3843	1.31183e-07	6.84125e-05	6.15396e-06	0	0.000136767	0	0
26.8186	1.31183e-07	7.02441e-05	6.43791e-06	0	0.000138051	0	0
27.2574	1.31183e-07	7.21454e-05	6.79659e-06	0	0.000139354	0	0
27.7	1.31183e-07	7.40384e-05	7.10545e-06	0	0.000140666	0	0
28.1468	1.31183e-07	7.59298e-05	7.46412e-06	0	0.000141933	0	0
28.5978	1.31183e-07	7.78245e-05	7.79623e-06	0	0.000143295	0	0
29.0529	1.31183e-07	7.98005e-05	8.10841e-06	0	0.000144588	0	0
29.5125	1.31183e-07	8.18529e-05	8.48037e-06	0	0.00014582	0	0
29.9762	1.31183e-07	8.38655e-05	8.80252e-06	0	0.00014713	0	0
30.4445	1.31183e-07	8.60508e-05	9.1944e-06	0	0.000148404	0	0
30.9172	1.31183e-07	8.81945e-05	9.58297e-06	0	0.000149628	0	0
31.395	1.31183e-07	9.03848e-05	9.98648e-06	0	0.000150867	0	0
31.8773	1.31183e-07	9.2585e-05	1.0395e-05	0	0.000152092	0	0
32.3641	1.31183e-07	9.47686e-05	1.08001e-05	0	0.000153296	0	0
32.856	1.31183e-07	9.69605e-05	1.12551e-05	0	0.000154511	0	0
33.3528	1.31183e-07	9.92371e-05	1.16852e-05	0	0.000155634	0	0
33.8545	1.31183e-07	0.0001016	1.21585e-05	0	0.000156848	0	0
34.3609	1.31183e-07	0.000104028	1.26849e-05	0	0.000158015	0	0
34.8731	1.31183e-07	0.000106427	1.31814e-05	0	0.000159252	0	0
35.3904	1.31183e-07	0.000108923	1.37908e-05	0	0.000160352	0	0
35.9128	1.31183e-07	0.000111342	1.43969e-05	0	0.000161476	0	0
36.4405	1.31183e-07	0.000113885	1.49515e-05	0	0.00016259	0	0
36.9737	1.31183e-07	0.000116439	1.54679e-05	0	0.000163651	0	0
37.5122	1.31183e-07	0.000119092	1.60641e-05	0	0.000164747	0	0
38.0563	1.31183e-07	0.000121742	1.67366e-05	0	0.000165949	0	0
38.6061	1.31183e-07	0.000124305	1.73327e-05	0	0.000167087	0	0
39.1618	1.31183e-07	0.000126986	1.80467e-05	0	0.000168125	0	0
39.7238	1.31183e-07	0.00012963	1.87425e-05	0	0.00016927	0	0
40.2911	1.31183e-07	0.000132391	1.94549e-05	0	0.0001704	0	0
40.8647	1.31183e-07	0.000135216	2.01457e-05	0	0.000171442	0	0
41.4439	1.31183e-07	0.000138032	2.08414e-05	0	0.000172533	0	0
42.0297	1.31183e-07	0.00014094	2.1602e-05	0	0.000173593	0	0
42.6217	1.31183e-07	0.000143846	2.24272e-05	0	0.000174644	0	0
43.2198	1.31183e-07	0.000146753	2.32675e-05	0	0.000175672	0	0
43.8242	1.31183e-07	0.000149764	2.40944e-05	0	0.000176675	0	0
44.436	1.31183e-07	0.000152672	2.49396e-05	0	0.000177716	0	0
45.0544	1.31183e-07	0.000155697	2.57865e-05	0	0.000178657	0	0
45.6793	1.31183e-07	0.000158852	2.67297e-05	0	0.00017969	0	0
46.3116	1.31183e-07	0.000161952	2.76928e-05	0	0.0001807	0	0
46.9502	1.31183e-07	0.000165162	2.86443e-05	0	0.000181633	0	0
47.5962	1.31183e-07	0.000168297	2.96323e-05	0	0.000182571	0	0
48.2495	1.31183e-07	0.000171569	3.06237e-05	0	0.000183554	0	0
48.9099	1.31183e-07	0.000174901	3.17163e-05	0	0.000184484	0	0
49.5773	1.31183e-07	0.000178131	3.28787e-05	0	0.000185354	0	0
50.253	1.31183e-07	0.000181489	3.40012e-05	0	0.000186249	0	0
50.9363	1.31183e-07	0.000184991	3.51968e-05	0	0.000187168	0	0
51.6268	1.31183e-07	0.00018836	3.6502e-05	0	0.000188024	0	0
52.325	1.31183e-07	0.000191894	3.7744e-05	0	0.000188875	0	0
53.0314	1.31183e-07	0.000195435	3.90027e-05	0	0.000189725	0	0
53.7467	1.31183e-07	0.000198948	4.03993e-05	0	0.000190618	0	0
54.4697	1.31183e-07	0.000202423	4.18024e-05	0	0.000191442	0	0
55.2009	1.31183e-07	0.000205985	4.32371e-05	0	0.000192249	0	0
55.9404	1.31183e-07	0.00020952	4.46917e-05	0	0.000193058	0	0
56.6885	1.31183e-07	0.000213129	4.61912e-05	0	0.000193921	0	0
57.4458	1.31183e-07	0.000216783	4.77422e-05	0	0.000194766	0	0
58.2121	1.31183e-07	0.000220711	4.93329e-05	0	0.00019552	0	0
58.987	1.31183e-07	0.000224692	5.09553e-05	0	0.000196327	0	0
59.7712	1.31183e-07	0.000228576	5.26839e-05	0	0.000197116	0	0
60.5643	1.31183e-07	0.000232505	5.44557e-05	0	0.00019782	0	0
61.3668	1.31183e-07	0.000236278	5.6284e-05	0	0.000198582	0	0
62.1784	1.31183e-07	0.000240242	5.81537e-05	0	0.000199334	0	0
62.9993	1.31183e-07	0.000244144	5.99953e-05	0	0.000200029	0	0
63.8301	1.31183e-07	0.000248151	6.18617e-05	0	0.000200854	0	0
64.6714	1.31183e-07	0.000252138	6.37846e-05	0	0.000201543	0	0
65.5226	1.31183e-07	0.000256241	6.58254e-05	0	0.000202199	0	0
66.3831	1.31183e-07	0.000260411	6.78928e-05	0	0.000202846	0	0
67.2542	1.31183e-07	0.000264559	7.0015e-05	0	0.000203507	0	0
68.136	1.31183e-07	0.000268687	7.22766e-05	0	0.000204125	0	0
69.0277	1.31183e-07	0.000272903	7.45814e-05	0	0.000204804	0	0
69.93	1.31183e-07	0.000277265	7.69909e-05	0	0.000205432	0	0
70.8436	1.31183e-07	0.000281651	7.92808e-05	0	0.000206018	0	0
71.7678	1.31183e-07	0.000285951	8.17815e-05	0	0.000206677	0	0
72.7031	1.31183e-07	0.000290234	8.44301e-05	0	0.000207297	0	0
73.6493	1.31183e-07	0.000294651	8.70903e-05	0	0.000207876	0	0
74.6062	1.31183e-07	0.000299149	8.97239e-05	0	0.000208452	0	0
75.5751	1.31183e-07	0.000303664	9.24273e-05	0	0.000209027	0	0
76.5558	1.31183e-07	0.000308164	9.51821e-05	0	0.00020959	0	0
77.5478	1.31183e-07	0.000312596	9.81129e-05	0	0.000210121	0	0
78.5529	1.31183e-07	0.000317226	0.000101094	0	0.000210704	0	0
79.5702	1.31183e-07	0.000321955	0.000104171	0	0.000211204	0	0
80.5985	1.31183e-07	0.000326626	0.000107367	0	0.000211714	0	0
81.6388	1.31183e-07	0.000331125	0.000110564	0	0.000212154	0	0
82.6919	1.31183e-07	0.000335788	0.000113852	0	0.000212665	0	0
83.7584	1.31183e-07	0.000340391	0.000117148	0	0.00021312	0	0
84.8371	1.31183e-07	0.000345204	0.000120592	0	0.000213569	0	0
85.9285	1.31183e-07	0.00034995	0.00012413	0	0.000213992	0	0
87.0334	1.32843e-07	0.000354538	0.000127775	0	0.000214444	0	0
88.1515	1.32843e-07	0.000359316	0.000131619	0	0.000214842	0	0
89.2824	1.32843e-07	0.00036415	0.000135477	0	0.000215269	0	0
90.4266	1.32843e-07	0.000369017	0.000139455	0	0.000215694	0	0
91.584	1.32843e-07	0.000373839	0.000143535	0	0.000216086	0	0
92.7563	1.32843e-07	0.000378717	0.000147675	0	0.000216494	0	0
93.9401	1.32843e-07	0.00038353	0.000151923	0	0.000216856	0	0
95.1397	1.32843e-07	0.00038838	0.000156202	0	0.000217194	0	0
96.3516	1.32843e-07	0.000393408	0.000160511	0	0.000217629	0	0
97.5792	1.32843e-07	0.000398553	0.000165009	0	0.000217984	0	0
98.8208	1.32843e-07	0.000403574	0.000169559	0	0.000218371	0	0
100.076	1.32843e-07	0.000408536	0.000174255	0	0.000218736	0	0
101.347	1.32843e-07	0.000413466	0.000179131	0	0.00021909	0	0
102.632	1.32843e-07	0.000418497	0.000184043	0	0.000219439	0	0
103.932	1.32843e-07	0.000423662	0.000188996	0	0.000219746	0	0
105.246	1.32843e-07	0.000428683	0.000194102	0	0.000220041	0	0
106.577	1.32843e-07	0.000433547	0.000199459	0	0.000220332	0	0
107.922	1.32843e-07	0.000438603	0.000204969	0	0.000220647	0	0
109.282	1.32843e-07	0.000443691	0.000210334	0	0.000220943	0	0
110.657	1.32843e-07	0.000448706	0.000216018	0	0.000221237	0	0
112.048	1.32843e-07	0.00045378	0.000221964	0	0.000221569	0	0
113.455	1.32843e-07	0.000458706	0.000227912	0	0.000221851	0	0
114.877	1.32843e-07	0.000463566	0.000234207	0	0.000222139	0	0
116.314	1.32843e-07	0.000468697	0.000240287	0	0.000222398	0	0
117.767	1.32843e-07	0.000473674	0.000246567	0	0.000222703	0	0
119.237	1.32843e-07	0.000478655	0.000253121	0	0.000222999	0	0
120.723	1.32843e-07	0.000483873	0.000259884	0	0.000223278	0	0
122.225	1.32843e-07	0.000489029	0.000266681	0	0.000223563	0	0
123.743	1.32843e-07	0.00049405	0.000273466	0	0.000223822	0	0
125.278	1.32843e-07	0.000498861	0.000280332	0	0.000224063	0	0
126.829	1.32843e-07	0.000503905	0.000287531	0	0.000224314	0	0
128.397	1.32843e-07	0.000509101	0.000294905	0	0.000224576	0	0
129.982	1.32843e-07	0.000514053	0.000302379	0	0.000224814	0	0
131.583	1.34504e-07	0.000519061	0.000309966	0	0.000225045	0	0
133.201	1.34504e-07	0.000524059	0.000317644	0	0.000225274	0	0
134.835	1.34504e-07	0.000529033	0.000325668	0	0.000225529	0	0
136.488	1.34504e-07	0.00053395	0.000333692	0	0.000225772	0	0
138.157	1.34504e-07	0.000538885	0.000341975	0	0.000226001	0	0
139.842	1.34504e-07	0.000543944	0.000350428	0	0.000226212	0	0
141.548	1.34504e-07	0.000548737	0.000358776	0	0.000226428	0	0
143.268	1.34504e-07	0.000553738	0.000367522	0	0.000226655	0	0
145.007	1.36164e-07	0.000558519	0.000376388	0	0.000226896	0	0
146.762	1.36164e-07	0.00056325	0.000385277	0	0.000227127	0	0
148.535	1.36164e-07	0.000568054	0.000394403	0	0.000227381	0	0
150.327	1.36164e-07	0.000572839	0.000403655	0	0.000227637	0	0
152.135	1.36164e-07	0.000577584	0.000413164	0	0.000227887	0	0
153.961	1.36164e-07	0.000582364	0.000422853	0	0.000228077	0	0
155.806	1.36164e-07	0.000587088	0.000432457	0	0.000228332	0	0
157.667	1.36164e-07	0.000591768	0.000442406	0	0.000228588	0	0
159.547	1.36164e-07	0.000596358	0.000452714	0	0.000228804	0	0
161.444	1.36164e-07	0.000600894	0.00046288	0	0.00022907	0	0
163.359	1.37825e-07	0.000605565	0.000473302	0	0.000229327	0	0
165.293	1.39485e-07	0.000610114	0.000483954	0	0.000229583	0	0
167.244	1.39485e-07	0.000614668	0.000494768	0	0.00022982	0	0
169.213	1.39485e-07	0.000619335	0.00050548	0	0.000230028	0	0
171.201	1.39485e-07	0.000623775	0.000516829	0	0.00023026	0	0
173.206	1.39485e-07	0.000628388	0.000528045	0	0.000230481	0	0
175.23	1.39485e-07	0.000632904	0.000539717	0	0.000230714	0	0
177.272	1.39485e-07	0.000637423	0.000551586	0	0.000230949	0	0
179.332	1.39485e-07	0.000641928	0.000563446	0	0.000231177	0	0
181.409	1.39485e-07	0.000646378	0.00057529	0	0.000231449	0	0
183.505	1.39485e-07	0.000650725	0.000587539	0	0.000231685	0	0
185.618	1.41146e-07	0.000655058	0.00059974	0	0.000231991	0	0
187.748	1.41146e-07	0.000659368	0.00061238	0	0.000232238	0	0
189.898	1.41146e-07	0.000663578	0.000625196	0	0.000232505	0	0
192.066	1.42806e-07	0.000667757	0.000637989	0	0.000232774	0	0
194.251	1.42806e-07	0.000671989	0.000650842	0	0.000233017	0	0
196.454	1.42806e-07	0.000676065	0.000663809	0	0.000233291	0	0
198.676	1.42806e-07	0.000680236	0.000677292	0	0.000233571	0	0
200.915	1.42806e-07	0.000684265	0.000690655	0	0.000233857	0	0
203.171	1.44467e-07	0.000688288	0.000704258	0	0.000234148	0	0
205.445	1.44467e-07	0.000692443	0.000718238	0	0.000234458	0	0
207.738	1.46127e-07	0.000696415	0.000732421	0	0.000234717	0	0
210.047	1.46127e-07	0.000700336	0.000746374	0	0.000234971	0	0
212.374	1.46127e-07	0.00070422	0.000760703	0	0.000235245	0	0
214.718	1.46127e-07	0.000708112	0.00077534	0	0.000235541	0	0
217.081	1.46127e-07	0.000711981	0.000789785	0	0.000235813	0	0
219.461	1.46127e-07	0.000715717	0.000804903	0	0.000236139	0	0
221.858	1.46127e-07	0.000719511	0.000820055	0	0.000236431	0	0
224.271	1.46127e-07	0.000723301	0.000835087	0	0.000236713	0	0
226.702	1.46127e-07	0.000727107	0.000850473	0	0.00023701	0	0
229.148	1.46127e-07	0.000730713	0.000866197	0	0.000237346	0	0
231.612	1.46127e-07	0.000734357	0.000881989	0	0.000237655	0	0
234.091	1.46127e-07	0.000737943	0.000897902	0	0.000237983	0	0
236.586	1.46127e-07	0.000741544	0.000914069	0	0.000238326	0	0
239.1	1.46127e-07	0.000745042	0.000930167	0	0.000238631	0	0
241.631	1.46127e-07	0.00074843	0.000946677	0	0.000238958	0	0
244.176	1.46127e-07	0.000751884	0.000963405	0	0.00023932	0	0
246.735	1.46127e-07	0.000755359	0.000980178	0	0.000239637	0	0
249.311	1.46127e-07	0.0007588	0.000997097	0	0.000239964	0	0
251.903	1.46127e-07	0.000762028	0.00101	0	0.000240312	0	0
254.51	1.46127e-07	0.0007652	0.00103	0	0.000240657	0	0
257.132	1.46127e-07	0.000768414	0.00105	0	0.000241011	0	0
259.772	1.47788e-07	0.00077176	0.00107	0	0.000241369	0	0
262.427	1.47788e-07	0.000774983	0.00108	0	0.000241705	0	0
265.094	1.47788e-07	0.000778253	0.0011	0	0.000242053	0	0
267.778	1.49448e-07	0.000781508	0.00112	0	0.0002424	0	0
270.475	1.49448e-07	0.000784611	0.00114	0	0.000242729	0	0
273.185	1.49448e-07	0.000787708	0.00116	0	0.000243116	0	0
275.911	1.51109e-07	0.00079083	0.00117	0	0.000243495	0	0
278.647	1.51109e-07	0.000793894	0.00119	0	0.000243893	0	0
281.399	1.51109e-07	0.000796979	0.00121	0	0.000244235	0	0
284.165	1.51109e-07	0.000799985	0.00123	0	0.000244685	0	0
286.942	1.5277e-07	0.00080306	0.00125	0	0.000245096	0	0
289.735	1.5277e-07	0.000805908	0.00127	0	0.000245461	0	0
292.54	1.5277e-07	0.000808922	0.00129	0	0.000245826	0	0
295.354	1.5277e-07	0.000811897	0.00131	0	0.000246221	0	0
298.182	1.5277e-07	0.000814806	0.00132	0	0.000246641	0	0
301.021	1.5443e-07	0.000817751	0.00134	0	0.000247028	0	0
303.875	1.5443e-07	0.000820615	0.00136	0	0.000247389	0	0
306.74	1.5443e-07	0.000823539	0.00138	0	0.000247781	0	0
309.615	1.5443e-07	0.000826374	0.0014	0	0.000248181	0	0
312.5	1.5443e-07	0.000829049	0.00142	0	0.000248579	0	0
315.398	1.5443e-07	0.000831731	0.00144	0	0.000248983	0	0
318.309	1.5443e-07	0.000834507	0.00146	0	0.000249405	0	0
321.229	1.5443e-07	0.000837189	0.00148	0	0.00024983	0	0
324.16	1.5443e-07	0.000839886	0.0015	0	0.000250242	0	0
327.1	1.5443e-07	0.000842602	0.00152	0	0.00025066	0	0
330.048	1.56091e-07	0.000845287	0.00154	0	0.000251082	0	0
333.01	1.56091e-07	0.000847926	0.00157	0	0.000251527	0	0
335.98	1.57751e-07	0.000850462	0.00159	0	0.00025194	0	0
338.959	1.57751e-07	0.000853125	0.00161	0	0.000252335	0	0
341.948	1.57751e-07	0.000855699	0.00163	0	0.000252726	0	0
344.944	1.59412e-07	0.000858168	0.00165	0	0.000253141	0	0
347.952	1.59412e-07	0.000860719	0.00167	0	0.000253586	0	0
350.968	1.59412e-07	0.00086315	0.00169	0	0.000254023	0	0
353.99	1.59412e-07	0.00086572	0.00171	0	0.000254446	0	0
357.019	1.59412e-07	0.000868211	0.00174	0	0.00025484	0	0
360.059	1.59412e-07	0.000870503	0.00176	0	0.000255253	0	0
363.107	1.59412e-07	0.000873008	0.00178	0	0.000255673	0	0
366.16	1.59412e-07	0.000875484	0.0018	0	0.00025609	0	0
369.22	1.59412e-07	0.00087793	0.00182	0	0.000256533	0	0
372.287	1.59412e-07	0.00088026	0.00184	0	0.000256947	0	0
375.361	1.61072e-07	0.0008826	0.00186	0	0.000257379	0	0
378.443	1.61072e-07	0.000884984	0.00189	0	0.000257812	0	0
381.533	1.61072e-07	0.000887304	0.00191	0	0.000258242	0	0
384.627	1.61072e-07	0.000889672	0.00193	0	0.000258729	0	0
387.728	1.62733e-07	0.000891955	0.00195	0	0.000259164	0	0
390.835	1.62733e-07	0.000894223	0.00197	0	0.000259665	0	0
393.949	1.64393e-07	0.000896593	0.002	0	0.000260137	0	0
397.068	1.66054e-07	0.000898936	0.00202	0	0.00026062	0	0
400.194	1.66054e-07	0.000901204	0.00204	0	0.00026102	0	0
403.323	1.67714e-07	0.000903484	0.00206	0	0.000261429	0	0
406.458	1.67714e-07	0.000905749	0.00209	0	0.000261877	0	0
409.598	1.67714e-07	0.000907949	0.00211	0	0.00026233	0	0
412.742	1.67714e-07	0.000910125	0.00213	0	0.000262802	0	0
415.891	1.67714e-07	0.000912386	0.00215	0	0.000263288	0	0
419.044	1.69375e-07	0.000914401	0.00218	0	0.000263772	0	0
422.207	1.69375e-07	0.000916551	0.0022	0	0.000264248	0	0
425.373	1.69375e-07	0.000918731	0.00222	0	0.000264673	0	0
428.544	1.69375e-07	0.000920917	0.00224	0	0.000265115	0	0
431.715	1.69375e-07	0.000923112	0.00227	0	0.000265641	0	0
434.889	1.71036e-07	0.00092529	0.00229	0	0.00026614	0	0
438.068	1.71036e-07	0.000927436	0.00231	0	0.000266606	0	0
441.256	1.74357e-07	0.000929473	0.00233	0	0.000267128	0	0
444.448	1.74357e-07	0.000931554	0.00236	0	0.000267588	0	0
447.638	1.76017e-07	0.000933703	0.00238	0	0.000268064	0	0
450.832	1.76017e-07	0.000935866	0.0024	0	0.000268554	0	0
454.029	1.77678e-07	0.000938007	0.00243	0	0.000269004	0	0
457.234	1.77678e-07	0.000940244	0.00245	0	0.000269512	0	0
460.439	1.77678e-07	0.000942329	0.00247	0	0.000269977	0	0
463.649	1.77678e-07	0.00094444	0.0025	0	0.00027046	0	0
466.862	1.77678e-07	0.000946618	0.00252	0	0.000270915	0	0
470.077	1.79338e-07	0.000948672	0.00254	0	0.00027134	0	0
473.297	1.80999e-07	0.000950742	0.00256	0	0.000271812	0	0
476.516	1.80999e-07	0.000952776	0.00259	0	0.000272322	0	0
479.742	1.80999e-07	0.000954873	0.00261	0	0.000272792	0	0
482.968	1.80999e-07	0.000956842	0.00263	0	0.000273325	0	0
486.196	1.82659e-07	0.00095885	0.00266	0	0.000273801	0	0
489.429	1.82659e-07	0.000960957	0.00268	0	0.000274246	0	0
492.661	1.82659e-07	0.00096295	0.0027	0	0.000274776	0	0
495.897	1.82659e-07	0.000964996	0.00273	0	0.000275236	0	0
499.132	1.82659e-07	0.000966972	0.00275	0	0.000275711	0	0
502.374	1.82659e-07	0.000968983	0.00277	0	0.000276229	0	0
505.616	1.82659e-07	0.000971038	0.0028	0	0.000276636	0	0
508.86	1.82659e-07	0.000972998	0.00282	0	0.000277156	0	0
512.105	1.82659e-07	0.000975007	0.00284	0	0.000277606	0	0
515.353	1.82659e-07	0.000977056	0.00287	0	0.00027811	0	0
518.602	1.82659e-07	0.000979024	0.00289	0	0.000278559	0	0
521.854	1.82659e-07	0.000980955	0.00291	0	0.00027907	0	0
525.104	1.8432e-07	0.000982883	0.00294	0	0.000279623	0	0
528.361	1.8432e-07	0.000984872	0.00296	0	0.000280128	0	0
531.617	1.8432e-07	0.000986974	0.00299	0	0.000280651	0	0
534.87	1.8432e-07	0.000988916	0.00301	0	0.000281144	0	0
538.131	1.8432e-07	0.000990875	0.00303	0	0.000281612	0	0
541.39	1.8598e-07	0.000992926	0.00306	0	0.000282142	0	0
544.652	1.8598e-07	0.000994844	0.00308	0	0.00028263	0	0
547.916	1.8598e-07	0.000996758	0.0031	0	0.000283094	0	0
551.18	1.8598e-07	0.000998706	0.00313	0	0.000283597	0	0
554.445	1.87641e-07	0.001	0.00315	0	0.000284082	0	0
557.711	1.87641e-07	0.001	0.00317	0	0.000284562	0	0
560.98	1.87641e-07	0.001	0.0032	0	0.000285031	0	0
564.251	1.87641e-07	0.00101	0.00322	0	0.000285467	0	0
567.523	1.87641e-07	0.00101	0.00325	0	0.000285988	0	0
570.796	1.87641e-07	0.00101	0.00327	0	0.000286466	0	0
574.067	1.87641e-07	0.00101	0.00329	0	0.0002869	0	0
577.339	1.87641e-07	0.00101	0.00332	0	0.000287376	0	0
580.612	1.87641e-07	0.00102	0.00334	0	0.000287874	0	0
583.889	1.87641e-07	0.00102	0.00336	0	0.000288404	0	0
587.165	1.89301e-07	0.00102	0.00339	0	0.000288872	0	0
590.444	1.90962e-07	0.00102	0.00341	0	0.000289369	0	0
593.724	1.90962e-07	0.00102	0.00344	0	0.000289869	0	0
597.006	1.90962e-07	0.00103	0.00346	0	0.000290373	0	0
600.284	1.92623e-07	0.00103	0.00348	0	0.000290848	0	0
603.565	1.92623e-07	0.00103	0.00351	0	0.00029133	0	0
606.844	1.92623e-07	0.00103	0.00353	0	0.000291845	0	0
610.124	1.94283e-07	0.00103	0.00356	0	0.000292381	0	0
613.406	1.94283e-07	0.00104	0.00358	0	0.000292864	0	0
616.691	1.94283e-07	0.00104	0.0036	0	0.000293356	0	0
619.977	1.94283e-07	0.00104	0.00363	0	0.000293842	0	0
623.261	1.95944e-07	0.00104	0.00365	0	0.000294345	0	0
626.546	1.97604e-07	0.00104	0.00368	0	0.000294824	0	0
629.831	2.00925e-07	0.00105	0.0037	0	0.000295292	0	0
633.117	2.00925e-07	0.00105	0.00372	0	0.00029575	0	0
636.403	2.00925e-07	0.00105	0.00375	0	0.000296235	0	0
639.692	2.00925e-07	0.00105	0.00377	0	0.00029669	0	0
642.978	2.00925e-07	0.00105	0.00379	0	0.000297208	0	0
646.265	2.02586e-07	0.00105	0.00382	0	0.000297675	0	0
649.553	2.04246e-07	0.00106	0.00384	0	0.000298166	0	0
652.844	2.05907e-07	0.00106	0.00387	0	0.000298651	0	0
656.137	2.05907e-07	0.00106	0.00389	0	0.000299168	0	0
659.426	2.05907e-07	0.00106	0.00391	0	0.000299687	0	0
662.714	2.09228e-07	0.00106	0.00394	0	0.000300176	0	0
666.004	2.09228e-07	0.00107	0.00396	0	0.000300664	0	0
669.294	2.09228e-07	0.00107	0.00398	0	0.000301184	0	0
672.584	2.10888e-07	0.00107	0.00401	0	0.000301657	0	0
675.874	2.10888e-07	0.00107	0.00403	0	0.00030217	0	0
679.163	2.12549e-07	0.00107	0.00406	0	0.000302678	0	0
682.455	2.12549e-07	0.00108	0.00408	0	0.000303173	0	0
685.748	2.12549e-07	0.00108	0.0041	0	0.000303651	0	0
689.038	2.12549e-07	0.00108	0.00413	0	0.000304156	0	0
692.331	2.12549e-07	0.00108	0.00415	0	0.000304631	0	0
695.625	2.1421e-07	0.00108	0.00418	0	0.000305134	0	0
698.922	2.1421e-07	0.00108	0.0042	0	0.000305634	0	0
702.215	2.1421e-07	0.00109	0.00422	0	0.000306115	0	0
705.51	2.1421e-07	0.00109	0.00425	0	0.0003066	0	0
708.804	2.1421e-07	0.00109	0.00427	0	0.000307112	0	0
712.094	2.1421e-07	0.00109	0.0043	0	0.000307555	0	0
715.39	2.1587e-07	0.00109	0.00432	0	0.000308052	0	0
718.684	2.1587e-07	0.0011	0.00434	0	0.00030859	0	0
721.98	2.1587e-07	0.0011	0.00437	0	0.000309056	0	0
725.276	2.17531e-07	0.0011	0.00439	0	0.000309574	0	0
728.572	2.17531e-07	0.0011	0.00442	0	0.000310044	0	0
731.868	2.17531e-07	0.0011	0.00444	0	0.000310551	0	0
735.162	2.17531e-07	0.00111	0.00446	0	0.000311065	0	0
738.455	2.17531e-07	0.00111	0.00449	0	0.000311519	0	0
741.755	2.19191e-07	0.00111	0.00451	0	0.000312005	0	0
745.049	2.19191e-07	0.00111	0.00454	0	0.00031247	0	0
748.345	2.19191e-07	0.00111	0.00456	0	0.000312963	0	0
751.638	2.20852e-07	0.00112	0.00458	0	0.00031345	0	0
754.932	2.20852e-07	0.00112	0.00461	0	0.000313941	0	0
758.229	2.22512e-07	0.00112	0.00463	0	0.00031442	0	0
761.527	2.22512e-07	0.00112	0.00466	0	0.000314891	0	0
764.822	2.22512e-07	0.00112	0.00468	0	0.000315426	0	0
768.121	2.22512e-07	0.00112	0.00471	0	0.000315911	0	0
771.418	2.22512e-07	0.00113	0.00473	0	0.000316406	0	0
774.719	2.22512e-07	0.00113	0.00475	0	0.000316887	0	0
778.017	2.22512e-07	0.00113	0.00478	0	0.000317379	0	0
781.314	2.22512e-07	0.00113	0.0048	0	0.000317907	0	0
784.612	2.22512e-07	0.00113	0.00483	0	0.000318385	0	0
787.911	2.22512e-07	0.00114	0.00485	0	0.000318916	0	0
791.207	2.22512e-07	0.00114	0.00487	0	0.000319458	0	0
794.505	2.22512e-07	0.00114	0.0049	0	0.000319966	0	0
797.802	2.22512e-07	0.00114	0.00492	0	0.000320502	0	0
801.098	2.22512e-07	0.00114	0.00494	0	0.000321004	0	0
804.396	2.22512e-07	0.00115	0.00497	0	0.00032153	0	0
807.697	2.22512e-07	0.00115	0.00499	0	0.000321967	0	0
810.995	2.22512e-07	0.00115	0.00502	0	0.000322472	0	0
814.296	2.22512e-07	0.00115	0.00504	0	0.000322988	0	0
817.593	2.22512e-07	0.00115	0.00506	0	0.00032346	0	0
820.891	2.22512e-07	0.00115	0.00509	0	0.000323925	0	0
824.187	2.22512e-07	0.00116	0.00511	0	0.000324439	0	0
827.487	2.22512e-07	0.00116	0.00514	0	0.000324941	0	0
830.784	2.22512e-07	0.00116	0.00516	0	0.000325447	0	0
834.081	2.22512e-07	0.00116	0.00518	0	0.000325931	0	0
837.382	2.22512e-07	0.00116	0.00521	0	0.000326397	0	0
840.68	2.22512e-07	0.00117	0.00523	0	0.000326829	0	0
843.979	2.25833e-07	0.00117	0.00526	0	0.00032732	0	0
847.278	2.25833e-07	0.00117	0.00528	0	0.000327797	0	0
850.575	2.25833e-07	0.00117	0.0053	0	0.000328255	0	0
853.874	2.25833e-07	0.00117	0.00533	0	0.000328763	0	0
857.174	2.25833e-07	0.00118	0.00535	0	0.000329283	0	0
860.476	2.25833e-07	0.00118	0.00538	0	0.000329816	0	0
863.774	2.27494e-07	0.00118	0.0054	0	0.000330323	0	0
867.072	2.27494e-07	0.00118	0.00542	0	0.000330811	0	0
870.373	2.29154e-07	0.00118	0.00545	0	0.000331319	0	0
873.674	2.29154e-07	0.00118	0.00547	0	0.000331814	0	0
876.975	2.29154e-07	0.00119	0.00549	0	0.000332342	0	0
880.278	2.29154e-07	0.00119	0.00552	0	0.00033284	0	0
883.58	2.29154e-07	0.00119	0.00554	0	0.000333312	0	0
886.88	2.29154e-07	0.00119	0.00557	0	0.000333826	0	0
890.179	2.29154e-07	0.00119	0.00559	0	0.000334303	0	0
893.48	2.29154e-07	0.0012	0.00561	0	0.000334899	0	0
896.777	2.29154e-07	0.0012	0.00564	0	0.000335421	0	0
900.078	2.29154e-07	0.0012	0.00566	0	0.000335932	0	0
903.379	2.30815e-07	0.0012	0.00569	0	0.00033645	0	0
906.678	2.30815e-07	0.0012	0.00571	0	0.000336995	0	0
909.977	2.30815e-07	0.00121	0.00574	0	0.000337468	0	0
913.278	2.32475e-07	0.00121	0.00576	0	0.000337984	0	0
916.576	2.32475e-07	0.00121	0.00578	0	0.000338534	0	0
919.876	2.32475e-07	0.00121	0.00581	0	0.000339011	0	0
923.177	2.32475e-07	0.00121	0.00583	0	0.00033952	0	0
926.478	2.32475e-07	0.00121	0.00586	0	0.000340022	0	0
929.777	2.32475e-07	0.00122	0.00588	0	0.000340523	0	0
933.077	2.34136e-07	0.00122	0.0059	0	0.000341005	0	0
936.376	2.34136e-07	0.00122	0.00593	0	0.000341501	0	0
939.678	2.35797e-07	0.00122	0.00595	0	0.000342005	0	0
942.977	2.35797e-07	0.00122	0.00598	0	0.000342468	0	0
946.278	2.35797e-07	0.00123	0.006	0	0.000343021	0	0
949.578	2.35797e-07	0.00123	0.00602	0	0.000343531	0	0
952.879	2.35797e-07	0.00123	0.00605	0	0.000344019	0	0
956.183	2.35797e-07	0.00123	0.00607	0	0.000344499	0	0
959.48	2.35797e-07	0.00123	0.0061	0	0.00034499	0	0
962.781	2.35797e-07	0.00124	0.00612	0	0.00034549	0	0
966.083	2.35797e-07	0.00124	0.00614	0	0.000346015	0	0
969.384	2.35797e-07	0.00124	0.00617	0	0.000346516	0	0
972.688	2.35797e-07	0.00124	0.00619	0	0.000347009	0	0
975.989	2.35797e-07	0.00124	0.00622	0	0.000347536	0	0
979.286	2.35797e-07	0.00124	0.00624	0	0.000348044	0	0
982.588	2.35797e-07	0.00125	0.00626	0	0.000348557	0	0
985.888	2.35797e-07	0.00125	0.00629	0	0.000349032	0	0
989.191	2.37457e-07	0.00125	0.00631	0	0.000349575	0	0
992.493	2.37457e-07	0.00125	0.00634	0	0.000350071	0	0
995.795	2.37457e-07	0.00125	0.00636	0	0.000350623	0	0
999.097	2.37457e-07	0.00126	0.00638	0	0.000351071	0	0
1002.4	2.37457e-07	0.00126	0.00641	0	0.000351588	0	0
1005.7	2.37457e-07	0.00126	0.00643	0	0.000352059	0	0
1009	2.37457e-07	0.00126	0.00646	0	0.000352581	0	0
1012.3	2.37457e-07	0.00126	0.00648	0	0.00035311	0	0
1015.6	2.37457e-07	0.00127	0.0065	0	0.000353637	0	0
1018.9	2.37457e-07	0.00127	0.00653	0	0.000354107	0	0
1022.21	2.37457e-07	0.00127	0.00655	0	0.000354606	0	0
1025.51	2.37457e-07	0.00127	0.00658	0	0.000355134	0	0
1028.81	2.37457e-07	0.00127	0.0066	0	0.000355701	0	0
1032.12	2.37457e-07	0.00127	0.00662	0	0.00035622	0	0
1035.42	2.37457e-07	0.00128	0.00665	0	0.000356682	0	0
1038.72	2.37457e-07	0.00128	0.00667	0	0.000357189	0	0
1042.02	2.39118e-07	0.00128	0.0067	0	0.00035772	0	0
1045.32	2.40778e-07	0.00128	0.00672	0	0.000358225	0	0
1048.62	2.40778e-07	0.00128	0.00674	0	0.000358715	0	0
1051.92	2.42439e-07	0.00129	0.00677	0	0.000359203	0	0
1055.23	2.44099e-07	0.00129	0.00679	0	0.000359728	0	0
1058.52	2.44099e-07	0.00129	0.00682	0	0.000360163	0	0
1061.83	2.4576e-07	0.00129	0.00684	0	0.000360676	0	0
1065.13	2.4576e-07	0.00129	0.00686	0	0.00036118	0	0
1068.43	2.4576e-07	0.0013	0.00689	0	0.000361675	0	0
1071.73	2.4576e-07	0.0013	0.00691	0	0.000362225	0	0
1075.03	2.4576e-07	0.0013	0.00694	0	0.000362705	0	0
1078.33	2.4576e-07	0.0013	0.00696	0	0.000363196	0	0
1081.63	2.4576e-07	0.0013	0.00698	0	0.000363754	0	0
1084.93	2.4576e-07	0.0013	0.00701	0	0.000364244	0	0
1088.24	2.4576e-07	0.00131	0.00703	0	0.000364797	0	0
1091.54	2.4576e-07	0.00131	0.00706	0	0.000365292	0	0
1094.84	2.4576e-07	0.00131	0.00708	0	0.000365739	0	0
1098.14	2.4576e-07	0.00131	0.0071	0	0.000366293	0	0
1101.45	2.4576e-07	0.00131	0.00713	0	0.000366803	0	0
1104.74	2.4576e-07	0.00132	0.00715	0	0.000367275	0	0
1108.04	2.4576e-07	0.00132	0.00718	0	0.000367768	0	0
1111.34	2.4576e-07	0.00132	0.0072	0	0.000368316	0	0
1114.65	2.4576e-07	0.00132	0.00722	0	0.00036886	0	0
1117.95	2.4576e-07	0.00132	0.00725	0	0.000369385	0	0
1121.25	2.4576e-07	0.00133	0.00727	0	0.000369863	0	0
1124.54	2.4742e-07	0.00133	0.0073	0	0.000370343	0	0
1127.84	2.4742e-07	0.00133	0.00732	0	0.000370833	0	0
1131.14	2.49081e-07	0.00133	0.00734	0	0.000371398	0	0
1134.44	2.49081e-07	0.00133	0.00737	0	0.000371891	0	0
1137.74	2.49081e-07	0.00134	0.00739	0	0.000372379	0	0
1141.04	2.49081e-07	0.00134	0.00742	0	0.000372886	0	0
1144.34	2.49081e-07	0.00134	0.00744	0	0.0003734	0	0
1147.65	2.49081e-07	0.00134	0.00746	0	0.000373892	0	0
1150.94	2.49081e-07	0.00134	0.00749	0	0.000374428	0	0
1154.24	2.50741e-07	0.00134	0.00751	0	0.00037493	0	0
1157.54	2.52402e-07	0.00135	0.00753	0	0.000375445	0	0
1160.84	2.52402e-07	0.00135	0.00756	0	0.000375944	0	0
1164.14	2.52402e-07	0.00135	0.00758	0	0.000376447	0	0
1167.45	2.52402e-07	0.00135	0.00761	0	0.000376969	0	0
1170.75	2.55723e-07	0.00135	0.00763	0	0.000377467	0	0
1174.05	2.55723e-07	0.00136	0.00765	0	0.000377959	0	0
1177.35	2.55723e-07	0.00136	0.00768	0	0.000378472	0	0
1180.65	2.57384e-07	0.00136	0.0077	0	0.000378968	0	0
1183.95	2.57384e-07	0.00136	0.00773	0	0.000379463	0	0
1187.25	2.57384e-07	0.00136	0.00775	0	0.000379948	0	0
1190.55	2.57384e-07	0.00137	0.00777	0	0.000380433	0	0
1193.85	2.59044e-07	0.00137	0.0078	0	0.000380948	0	0
1197.15	2.59044e-07	0.00137	0.00782	0	0.000381497	0	0
1200	2.59044e-07	0.00137	0.00784	0	0.000381951	0	0
1200	2.59044e-07	0.00137	0.00784	0	0.000381951	0	0
1229.48	2.59044e-07	0.00137	0.00784	0	0.000381951	0	0
1270.83	2.59044e-07	0.00137	0.00784	0	0.000381951	0	0
1324.52	2.59044e-07	0.00137	0.00784	0	0.000381951	0	0
1389.8	2.59044e-07	0.00137	0.00784	0	0.000381951	0	0
1465.99	2.59044e-07	0.00137	0.00784	0	0.000381951	0	0
1552.26	2.59044e-07	0.00137	0.00784	0	0.000381951	0	0
1647.92	2.59044e-07	0.00137	0.00784	0	0.000381951	0	0
1752.83	2.59044e-07	0.00137	0.00784	0	0.000381951	0	0
1867.62	2.59044e-07	0.00137	0.00784	0	0.000381951	0	0
1993.67	2.59044e-07	0.00137	0.00784	0	0.000381951	0	0
2133.04	2.59044e-07	0.00137	0.00784	0	0.000381951	0	0
2288.7	2.59044e-07	0.00137	0.00784	0	0.000381951	0	0
2400	2.59044e-07	0.00137	0.00784	0	0.000381951	0	0

## Sheet: Fig 5
time	1	2	3	4
s	per diad-s	per diad-s	per diad-s	per diad-s
0	0	0	0	0
0.000169938	58.2634	0.29172	0	0
0.000340247	57.6773	0.86383	0	0
0.000510859	57.142	1.42451	0	0
0.000681856	56.5609	1.9799	0	0
0.000853262	55.9772	2.51945	0	0
0.00103	55.4387	3.04873	9.66769e-06	0
0.0012	54.8883	3.56973	9.64338e-06	0
0.00137	54.3228	4.07672	0	0
0.00154	53.7728	4.58467	0	0
0.00172	53.2422	5.07485	9.57155e-06	0
0.00189	52.7257	5.56921	1.91003e-05	0
0.00206	52.1887	6.04462	9.52479e-06	0
0.00224	51.6588	6.51562	2.84998e-05	0
0.00241	51.1047	6.9613	9.46674e-06	0
0.00259	50.6064	7.40848	9.44048e-06	0
0.00277	50.0541	7.86525	1.88207e-05	0
0.00294	49.533	8.29035	2.81412e-05	0
0.00312	49.0289	8.72163	2.80605e-05	0
0.0033	48.5595	9.12892	9.3308e-06	0
0.00348	48.0576	9.51713	4.65013e-05	0
0.00366	47.5447	9.93428	6.48765e-05	0
0.00384	47.0476	10.333	5.54285e-05	0
0.00402	46.5217	10.7135	9.20273e-05	0
0.0042	46.0902	11.0775	6.42301e-05	0
0.00438	45.5768	11.4568	9.14219e-05	0
0.00456	45.0639	11.791	2.73102e-05	0
0.00475	44.6006	12.157	7.25864e-05	0
0.00493	44.127	12.5048	8.13646e-05	0
0.00511	43.6713	12.8334	0.000108097	0
0.0053	43.1548	13.1578	0.000134511	0
0.00548	42.7278	13.4778	0.000125112	0
0.00567	42.2842	13.8067	0.000178142	0
0.00586	41.7554	14.1085	0.000159501	0
0.00605	41.3586	14.3944	0.000264902	0
0.00624	40.872	14.6946	0.000175784	0
0.00643	40.4758	14.9703	0.000201461	0
0.00662	39.9635	15.2847	0.000313861	0
0.00681	39.5439	15.552	0.000243135	0
0.007	39.11	15.8301	0.000302721	0
0.00719	38.6791	16.0828	0.000232424	0
0.00739	38.2142	16.3301	0.000436808	0
0.00758	37.779	16.5753	0.000400654	0
0.00778	37.3611	16.8297	0.000466788	0
0.00797	36.9436	17.0279	0.000261792	0
0.00817	36.5031	17.2553	0.000479113	0
0.00837	36.1053	17.4729	0.000560396	0
0.00857	35.6802	17.7145	0.000507806	0
0.00877	35.2626	17.9317	0.000638101	0
0.00897	34.8542	18.1006	0.000593259	0
0.00917	34.4104	18.3168	0.000713167	0
0.00938	34.0408	18.4858	0.00070123	0
0.00958	33.6354	18.6613	0.000616521	0
0.00979	33.196	18.841	0.000709526	0
0.00999	32.82	19.0192	0.000722225	0
0.0102	32.4194	19.1972	0.000718271	0
0.01041	32.0391	19.3308	0.000761753	0
0.01062	31.6489	19.4928	0.000812666	0
0.01083	31.2302	19.6464	0.000964572	0
0.01105	30.8834	19.7654	0.00109	0
0.01126	30.4629	19.9056	0.00134	0
0.01148	30.1024	20.0389	0.00115	0
0.01169	29.7584	20.1712	0.00123	0
0.01191	29.3306	20.2761	0.00126	0
0.01213	28.9912	20.4026	0.0014	0
0.01235	28.5762	20.5083	0.00145	0
0.01257	28.2295	20.5912	0.00128	0
0.0128	27.8591	20.6972	0.00126	0
0.01302	27.4935	20.8039	0.00145	0
0.01325	27.1611	20.8886	0.00169	0
0.01348	26.7668	20.9692	0.00162	0
0.01371	26.4222	21.049	0.00161	0
0.01394	26.0713	21.1177	0.00167	0
0.01417	25.715	21.1824	0.0019	0
0.01441	25.3459	21.2164	0.00197	0
0.01464	25.0267	21.2973	0.00171	0
0.01488	24.675	21.3189	0.00202	0
0.01512	24.3383	21.3711	0.00241	0
0.01536	24.0087	21.4056	0.00217	0
0.01561	23.6624	21.4437	0.00258	0
0.01585	23.3221	21.478	0.00259	0
0.0161	22.9773	21.5004	0.00238	0
0.01635	22.6664	21.5087	0.00256	0
0.0166	22.3192	21.5339	0.0026	0
0.01685	21.9829	21.5472	0.00282	0
0.01711	21.6659	21.5431	0.00283	0
0.01737	21.3391	21.5702	0.00295	0
0.01763	21.0197	21.5516	0.00309	0
0.01789	20.6872	21.5448	0.00309	0
0.01815	20.4077	21.5202	0.00315	0
0.01842	20.0443	21.4938	0.00339	0
0.01869	19.7562	21.4744	0.00338	0
0.01896	19.4284	21.4273	0.00361	0
0.01923	19.1471	21.4174	0.00393	0
0.01951	18.8348	21.3803	0.00382	0
0.01979	18.5134	21.3322	0.00383	0
0.02007	18.2524	21.2596	0.00397	0
0.02036	17.9228	21.2286	0.00436	0
0.02064	17.6226	21.163	0.0043	0
0.02093	17.3391	21.1045	0.00456	0
0.02123	17.0309	21.0351	0.00459	0
0.02152	16.7427	20.9508	0.00453	0
0.02182	16.4716	20.8901	0.00463	0
0.02213	16.16	20.8142	0.00505	0
0.02243	15.8837	20.7281	0.00522	0
0.02274	15.6049	20.6366	0.00548	0
0.02306	15.3153	20.5527	0.00572	0
0.02337	15.0362	20.436	0.00552	0
0.02369	14.7457	20.3455	0.00573	0
0.02402	14.4823	20.2322	0.00578	0
0.02434	14.2055	20.1308	0.00591	0
0.02468	13.9388	20.0178	0.00618	0
0.02501	13.6624	19.8823	0.00663	0
0.02535	13.4018	19.7532	0.00652	0
0.0257	13.1353	19.6489	0.00672	0
0.02605	12.8655	19.5068	0.00686	0
0.0264	12.6089	19.3719	0.00714	0
0.02676	12.3486	19.232	0.0076	0
0.02712	12.0914	19.0779	0.00755	0
0.02749	11.8276	18.9127	0.00772	0
0.02786	11.5722	18.7736	0.00817	0
0.02824	11.3175	18.6025	0.00809	0
0.02863	11.0669	18.4518	0.00856	0
0.02902	10.8292	18.2838	0.00886	0
0.02941	10.5761	18.1067	0.00872	0
0.02982	10.3412	17.9339	0.009	0
0.03022	10.093	17.7422	0.00927	0
0.03064	9.86205	17.5641	0.00969	3.99642e-06
0.03106	9.62133	17.3794	0.00984	0
0.03149	9.37426	17.1827	0.01	0
0.03193	9.13182	16.981	0.01014	0
0.03237	8.90405	16.7833	0.01044	0
0.03283	8.67046	16.558	0.01073	0
0.03329	8.45185	16.3577	0.01081	0
0.03376	8.2177	16.1406	0.01142	0
0.03424	8.00311	15.9257	0.01157	0
0.03473	7.77319	15.696	0.01136	0
0.03522	7.5467	15.4573	0.01217	0
0.03573	7.33012	15.2413	0.01219	0
0.03625	7.1134	15.0061	0.0128	0
0.03678	6.89009	14.756	0.01324	0
0.03733	6.6796	14.523	0.01303	3.05995e-06
0.03788	6.47351	14.2592	0.01357	0
0.03845	6.25385	14.0046	0.0136	0
0.03903	6.05875	13.7347	0.01426	0
0.03963	5.85534	13.4815	0.01464	0
0.04024	5.64739	13.2049	0.01484	0
0.04087	5.44873	12.9335	0.01531	0
0.04152	5.24577	12.6574	0.01582	0
0.04218	5.05409	12.3738	0.01573	2.50138e-06
0.04286	4.85017	12.089	0.01588	0
0.04357	4.65819	11.7939	0.01683	0
0.04429	4.46883	11.4913	0.01709	0
0.04504	4.27715	11.1929	0.01765	0
0.04582	4.09305	10.8891	0.0178	0
0.04662	3.90307	10.5853	0.01821	0
0.04745	3.72395	10.2586	0.01881	0
0.04831	3.54745	9.94387	0.0193	0
0.04921	3.36314	9.6164	0.01923	0
0.05015	3.18925	9.28217	0.01987	0
0.05112	3.01825	8.9493	0.02012	3.40983e-06
0.05214	2.84631	8.60687	0.02103	1.63026e-06
0.0532	2.67863	8.26317	0.02179	0
0.05433	2.51288	7.90665	0.02206	0
0.05551	2.34895	7.55485	0.02257	0
0.05675	2.18726	7.19067	0.0229	5.32609e-06
0.05808	2.02737	6.82012	0.02363	5.02164e-06
0.05948	1.87415	6.45314	0.02385	1.18058e-06
0.06099	1.71739	6.0665	0.02446	5.51512e-06
0.06261	1.56911	5.67918	0.02524	2.0529e-06
0.06435	1.42304	5.28371	0.02582	1.89881e-06
0.06626	1.27723	4.89017	0.02636	2.61747e-06
0.06835	1.13664	4.48082	0.02699	6.35737e-06
0.07066	0.99849	4.07066	0.02781	5.73262e-06
0.07327	0.86543	3.64853	0.02849	6.38241e-07
0.07624	0.73575	3.21985	0.02914	2.23675e-06
0.0797	0.60958	2.78121	0.03001	7.67553e-06
0.08385	0.48794	2.3351	0.03099	9.19886e-06
0.08904	0.37216	1.87855	0.03151	6.39374e-06
0.09599	0.26125	1.4127	0.03243	1.21897e-05
0.10651	0.15797	0.93299	0.03353	1.38923e-05
0.1284	0.06438	0.43462	0.03468	1.80497e-05
0.26177	0.00405	0.03456	0.03566	4.30675e-05
0.49385	1.02318e-06	2.32399e-05	0.0356	0.000106003
0.72757	5.68389e-08	8.09243e-06	0.03529	0.00018317
0.96244	6.36291e-08	7.93243e-06	0.03502	0.000263821
1.19911	1.05245e-07	7.94948e-06	0.03467	0.000343392
1.43708	2.09336e-07	8.12922e-06	0.0344	0.000419663
1.6766	2.98111e-07	7.91035e-06	0.0341	0.000498033
1.91772	2.54807e-07	8.05051e-06	0.0338	0.000573955
2.16021	4.79355e-07	7.73132e-06	0.03353	0.000651917
2.4043	6.46285e-07	7.91189e-06	0.03322	0.000728935
2.64994	6.89537e-07	8.146e-06	0.03294	0.00080304
2.89719	8.73064e-07	7.94488e-06	0.03263	0.000882506
3.14604	1.14107e-06	8.49461e-06	0.03235	0.000953966
3.39654	1.14018e-06	8.49829e-06	0.03205	0.00103
3.64855	1.5814e-06	8.35504e-06	0.03178	0.0011
3.90223	1.43353e-06	8.01862e-06	0.03149	0.00118
4.15747	1.76957e-06	8.76978e-06	0.03121	0.00126
4.4145	2.12554e-06	9.17406e-06	0.03091	0.00132
4.67317	2.234e-06	9.2056e-06	0.03063	0.0014
4.93371	2.75972e-06	9.32441e-06	0.03034	0.00147
5.19599	2.89964e-06	9.41432e-06	0.03005	0.00154
5.45998	3.43438e-06	9.8188e-06	0.02978	0.00161
5.72569	3.51849e-06	1.01368e-05	0.0295	0.00168
5.99308	3.99929e-06	1.05571e-05	0.02923	0.00176
6.26258	4.30689e-06	1.05115e-05	0.02892	0.00183
6.53376	4.48846e-06	1.09119e-05	0.02865	0.0019
6.80707	5.30409e-06	1.16411e-05	0.02835	0.00196
7.08227	5.3581e-06	1.16454e-05	0.02807	0.00204
7.35927	6.04875e-06	1.22654e-05	0.0278	0.00211
7.63845	6.35226e-06	1.24547e-05	0.02751	0.00217
7.91928	6.75263e-06	1.27484e-05	0.02725	0.00225
8.20197	6.86104e-06	1.27587e-05	0.027	0.00231
8.48676	8.16295e-06	1.39995e-05	0.02672	0.00237
8.77346	7.8191e-06	1.38311e-05	0.02644	0.00245
9.06248	8.48019e-06	1.43865e-05	0.02616	0.0025
9.35354	9.39076e-06	1.49248e-05	0.02589	0.00257
9.64653	9.9465e-06	1.54497e-05	0.02564	0.00263
9.94178	1.01237e-05	1.58492e-05	0.02535	0.0027
10.2393	1.12089e-05	1.68915e-05	0.02508	0.00276
10.539	1.1573e-05	1.72293e-05	0.0248	0.00283
10.8407	1.18878e-05	1.72704e-05	0.02456	0.00289
11.1448	1.31396e-05	1.82841e-05	0.02429	0.00295
11.4511	1.36423e-05	1.87967e-05	0.02401	0.00302
11.7599	1.43857e-05	1.97366e-05	0.02375	0.00308
12.0711	1.44988e-05	1.97071e-05	0.02346	0.00314
12.3847	1.60335e-05	2.1032e-05	0.02321	0.00319
12.7003	1.73632e-05	2.25617e-05	0.02298	0.00326
13.0184	1.72266e-05	2.22275e-05	0.02271	0.00331
13.3388	1.83926e-05	2.35439e-05	0.02246	0.00338
13.6619	1.90828e-05	2.39808e-05	0.02218	0.00344
13.9874	1.98784e-05	2.49998e-05	0.02193	0.00349
14.3157	2.05789e-05	2.50862e-05	0.02167	0.00355
14.6465	2.12047e-05	2.59035e-05	0.02142	0.0036
14.9796	2.28135e-05	2.72346e-05	0.02118	0.00366
15.3158	2.33627e-05	2.80106e-05	0.0209	0.00371
15.6543	2.4486e-05	2.91321e-05	0.02067	0.00378
15.9957	2.47767e-05	2.93293e-05	0.02041	0.00382
16.3398	2.58892e-05	3.04253e-05	0.02016	0.00388
16.6866	2.75801e-05	3.18512e-05	0.01991	0.00393
17.0363	2.84775e-05	3.25091e-05	0.01967	0.00399
17.389	2.95149e-05	3.38228e-05	0.01941	0.00405
17.7445	3.03998e-05	3.41688e-05	0.01916	0.00409
18.1029	3.12351e-05	3.5512e-05	0.01893	0.00415
18.4642	3.29481e-05	3.72453e-05	0.01869	0.0042
18.8289	3.4061e-05	3.78861e-05	0.01843	0.00424
19.1961	3.54491e-05	3.97491e-05	0.01821	0.0043
19.5665	3.63802e-05	4.05001e-05	0.01797	0.00434
19.94	3.77687e-05	4.16629e-05	0.01773	0.0044
20.317	3.88774e-05	4.28021e-05	0.01748	0.00444
20.6973	4.06046e-05	4.43384e-05	0.01724	0.00449
21.0806	4.10568e-05	4.46778e-05	0.01702	0.00453
21.4674	4.17139e-05	4.55564e-05	0.01678	0.00458
21.8576	4.39064e-05	4.76858e-05	0.01655	0.00462
22.2511	4.55019e-05	4.91007e-05	0.01631	0.00467
22.6485	4.61071e-05	4.99437e-05	0.01607	0.00471
23.0489	4.80277e-05	5.14198e-05	0.01587	0.00475
23.453	4.89049e-05	5.23858e-05	0.01564	0.00479
23.8605	5.06416e-05	5.39748e-05	0.0154	0.00485
24.2717	5.26844e-05	5.60524e-05	0.01518	0.00488
24.6867	5.36363e-05	5.66972e-05	0.01496	0.00492
25.1052	5.51916e-05	5.85526e-05	0.01475	0.00497
25.528	5.696e-05	6.04201e-05	0.01451	0.005
25.9542	5.91136e-05	6.22615e-05	0.0143	0.00505
26.3843	6.04459e-05	6.34531e-05	0.01409	0.00508
26.8186	6.24661e-05	6.52036e-05	0.01387	0.00511
27.2574	6.34866e-05	6.65069e-05	0.01364	0.00514
27.7	6.483e-05	6.77035e-05	0.01343	0.00518
28.1468	6.67103e-05	6.94903e-05	0.01322	0.00522
28.5978	6.80217e-05	7.08714e-05	0.01301	0.00525
29.0529	6.9499e-05	7.21628e-05	0.01281	0.00529
29.5125	7.20219e-05	7.4887e-05	0.01259	0.00532
29.9762	7.36827e-05	7.64617e-05	0.0124	0.00536
30.4445	7.75909e-05	8.00056e-05	0.01219	0.00538
30.9172	7.70854e-05	7.9783e-05	0.012	0.00541
31.395	7.96108e-05	8.22349e-05	0.01177	0.00545
31.8773	8.18217e-05	8.41253e-05	0.01159	0.00546
32.3641	8.40972e-05	8.6396e-05	0.01138	0.0055
32.856	8.565e-05	8.81818e-05	0.01118	0.00552
33.3528	8.74784e-05	8.96312e-05	0.01098	0.00555
33.8545	8.94044e-05	9.16946e-05	0.01079	0.00558
34.3609	9.22194e-05	9.45347e-05	0.01061	0.00561
34.8731	9.32906e-05	9.58806e-05	0.0104	0.00562
35.3904	9.55146e-05	9.75274e-05	0.01021	0.00565
35.9128	9.8381e-05	0.000100358	0.01003	0.00567
36.4405	9.94529e-05	0.00010164	0.00984	0.0057
36.9737	0.000102961	0.000104558	0.00966	0.00571
37.5122	0.000105187	0.000107265	0.00948	0.00574
38.0563	0.000106917	0.000109142	0.0093	0.00576
38.6061	0.00010983	0.000111772	0.00912	0.00577
39.1618	0.000111356	0.000113158	0.00894	0.00579
39.7238	0.00011241	0.000114481	0.00876	0.0058
40.2911	0.000116022	0.000117811	0.0086	0.00582
40.8647	0.000119527	0.000121278	0.00841	0.00584
41.4439	0.000121218	0.00012315	0.00826	0.00585
42.0297	0.000123529	0.000125117	0.00808	0.00586
42.6217	0.000126325	0.000128019	0.00792	0.00587
43.2198	0.000128666	0.000130356	0.00775	0.00589
43.8242	0.000131516	0.000133043	0.0076	0.0059
44.436	0.000134455	0.000136113	0.00742	0.0059
45.0544	0.000137381	0.000138603	0.00727	0.00591
45.6793	0.000140027	0.000141759	0.00711	0.00592
46.3116	0.000141985	0.000143587	0.00695	0.00592
46.9502	0.000144996	0.000146239	0.0068	0.00593
47.5962	0.000147844	0.000149538	0.00665	0.00594
48.2495	0.000150925	0.000152104	0.0065	0.00594
48.9099	0.00015344	0.000154775	0.00635	0.00595
49.5773	0.000157353	0.00015865	0.0062	0.00595
50.253	0.000160104	0.000161333	0.00605	0.00595
50.9363	0.000162119	0.000163487	0.00591	0.00595
51.6268	0.000164509	0.000165553	0.00578	0.00595
52.325	0.000168292	0.000169455	0.00564	0.00595
53.0314	0.000171594	0.000172797	0.0055	0.00595
53.7467	0.000173213	0.000174471	0.00536	0.00594
54.4697	0.000177942	0.000178923	0.00523	0.00594
55.2009	0.00018154	0.000182651	0.00511	0.00592
55.9404	0.000182635	0.000183605	0.00498	0.00593
56.6885	0.000187142	0.000188157	0.00485	0.00592
57.4458	0.000189444	0.000190623	0.00472	0.0059
58.2121	0.000193027	0.000193703	0.0046	0.0059
58.987	0.000196863	0.000197906	0.00448	0.00589
59.7712	0.000200293	0.000201237	0.00436	0.00588
60.5643	0.000203632	0.000204547	0.00424	0.00587
61.3668	0.000205755	0.000206589	0.00413	0.00585
62.1784	0.000210995	0.000211844	0.00402	0.00584
62.9993	0.000214512	0.000215326	0.00391	0.00583
63.8301	0.000216855	0.000217831	0.0038	0.00581
64.6714	0.000220221	0.000220932	0.00369	0.00579
65.5226	0.000224064	0.000224538	0.00359	0.00577
66.3831	0.00022856	0.000229363	0.00349	0.00576
67.2542	0.000231176	0.000231792	0.00339	0.00574
68.136	0.000233255	0.000233824	0.00329	0.00572
69.0277	0.000238951	0.00023961	0.0032	0.0057
69.93	0.00024097	0.000241765	0.00311	0.00568
70.8436	0.000245244	0.000245953	0.00301	0.00565
71.7678	0.00024996	0.000250522	0.00292	0.00563
72.7031	0.00025362	0.000254199	0.00283	0.00561
73.6493	0.000257385	0.00025801	0.00275	0.00558
74.6062	0.00026099	0.000261351	0.00267	0.00556
75.5751	0.000264503	0.000265144	0.00258	0.00553
76.5558	0.000268935	0.000269543	0.0025	0.0055
77.5478	0.000272034	0.00027235	0.00243	0.00547
78.5529	0.000276507	0.000276914	0.00235	0.00544
79.5702	0.000278397	0.00027903	0.00227	0.00541
80.5985	0.000283887	0.000284241	0.0022	0.00538
81.6388	0.000289639	0.000289963	0.00214	0.00535
82.6919	0.000292716	0.000293197	0.00206	0.00532
83.7584	0.000295135	0.000295555	0.002	0.00528
84.8371	0.00030005	0.00030048	0.00193	0.00525
85.9285	0.000302498	0.000302606	0.00187	0.00522
87.0334	0.00030786	0.000308282	0.00181	0.00517
88.1515	0.000311659	0.000311785	0.00175	0.00514
89.2824	0.000317788	0.00031819	0.0017	0.0051
90.4266	0.000319138	0.000319679	0.00164	0.00507
91.584	0.00032371	0.000323806	0.00159	0.00503
92.7563	0.000327725	0.000327898	0.00154	0.00499
93.9401	0.000332486	0.000332859	0.00149	0.00496
95.1397	0.0003358	0.000336086	0.00144	0.00491
96.3516	0.000340732	0.000341098	0.00139	0.00488
97.5792	0.000345036	0.000345243	0.00135	0.00483
98.8208	0.000349409	0.000349547	0.0013	0.00479
100.076	0.000352088	0.000352295	0.00126	0.00475
101.347	0.000356548	0.000356888	0.00122	0.00471
102.632	0.000361033	0.000361098	0.00118	0.00467
103.932	0.000365489	0.000365725	0.00115	0.00462
105.246	0.000369347	0.000369515	0.00111	0.00458
106.577	0.000374134	0.000374329	0.00107	0.00453
107.922	0.000378113	0.000378357	0.00104	0.00449
109.282	0.000382406	0.000382244	0.00101	0.00445
110.657	0.000386471	0.000386801	0.000983535	0.0044
112.048	0.000390596	0.000390769	0.000953914	0.00435
113.455	0.000395296	0.000395572	0.000924516	0.00431
114.877	0.000398954	0.000398992	0.000899012	0.00427
116.314	0.000404162	0.000404424	0.000875062	0.00422
117.767	0.000406248	0.000406384	0.000853056	0.00417
119.237	0.000411047	0.000411182	0.000828529	0.00413
120.723	0.000415446	0.000415436	0.000806924	0.00408
122.225	0.000419134	0.000419516	0.000786519	0.00403
123.743	0.000423766	0.000423852	0.000767946	0.00399
125.278	0.000427702	0.000427815	0.000747935	0.00394
126.829	0.00043075	0.000430907	0.000731635	0.00389
128.397	0.000436094	0.000436185	0.000715422	0.00384
129.982	0.000437987	0.000438016	0.000701587	0.0038
131.583	0.000443522	0.000443576	0.000687588	0.00375
133.201	0.000448067	0.000448135	0.000674099	0.0037
134.835	0.000451085	0.000451374	0.00066062	0.00366
136.488	0.000454583	0.000454721	0.000648031	0.00361
138.157	0.000459374	0.000459323	0.000636121	0.00356
139.842	0.000462534	0.000462659	0.000627718	0.00352
141.548	0.000465301	0.000465379	0.000617215	0.00347
143.268	0.000470286	0.000470486	0.000608989	0.00342
145.007	0.00047448	0.000474523	0.000600578	0.00338
146.762	0.000478214	0.000478302	0.000593641	0.00333
148.535	0.000481504	0.000481687	0.000586905	0.00329
150.327	0.000484955	0.000484926	0.000581354	0.00324
152.135	0.000490487	0.000490592	0.000575449	0.00319
153.961	0.000492673	0.000492881	0.000568418	0.00315
155.806	0.000496879	0.000496867	0.000564625	0.0031
157.667	0.000499962	0.000500042	0.000561218	0.00306
159.547	0.000503554	0.000503615	0.000555938	0.00301
161.444	0.000506887	0.000507141	0.000555185	0.00297
163.359	0.000510766	0.000510721	0.000551533	0.00292
165.293	0.000514555	0.000514772	0.000547517	0.00288
167.244	0.000517484	0.00051756	0.000544719	0.00284
169.213	0.000519811	0.000519954	0.000544728	0.0028
171.201	0.000524068	0.000524087	0.00054235	0.00275
173.206	0.000527151	0.000527196	0.000542369	0.00271
175.23	0.000530079	0.00053018	0.000541439	0.00267
177.272	0.000533356	0.000533454	0.000540523	0.00263
179.332	0.000537003	0.000537066	0.000539772	0.00259
181.409	0.000540122	0.000540212	0.000540602	0.00255
183.505	0.000542137	0.000542209	0.000539881	0.00251
185.618	0.000546312	0.00054649	0.000541325	0.00247
187.748	0.000548575	0.000548644	0.000542386	0.00243
189.898	0.000551796	0.000551948	0.000541645	0.00239
192.066	0.000555191	0.00055523	0.000542696	0.00236
194.251	0.000557547	0.000557592	0.000545684	0.00232
196.454	0.000561093	0.000561168	0.000545373	0.00228
198.676	0.000563651	0.000563799	0.000546827	0.00224
200.915	0.000565969	0.000566078	0.000548889	0.00221
203.171	0.000570731	0.000570901	0.00054973	0.00217
205.445	0.000572515	0.000572548	0.000551257	0.00214
207.738	0.000574344	0.000574509	0.00055369	0.0021
210.047	0.000577325	0.000577466	0.000556035	0.00207
212.374	0.000578644	0.000578742	0.000558807	0.00204
214.718	0.000582937	0.00058292	0.000558982	0.002
217.081	0.000583561	0.000583686	0.000560571	0.00197
219.461	0.000587273	0.00058746	0.000563713	0.00194
221.858	0.000589268	0.000589394	0.000565672	0.00191
224.271	0.000592005	0.000591984	0.000567816	0.00188
226.702	0.000594554	0.000594689	0.000569558	0.00185
229.148	0.000597054	0.000597243	0.000573004	0.00182
231.612	0.000598064	0.000598176	0.000574312	0.00179
234.091	0.000601161	0.000601236	0.000577555	0.00176
236.586	0.000603967	0.000604166	0.000579185	0.00174
239.1	0.000605832	0.000605885	0.000580957	0.00171
241.631	0.000606508	0.000606702	0.000583132	0.00168
244.176	0.000609655	0.000609643	0.000584868	0.00166
246.735	0.000612097	0.000612219	0.000587993	0.00163
249.311	0.000613529	0.000613714	0.000591149	0.0016
251.903	0.000614745	0.000614747	0.000592504	0.00158
254.51	0.000616851	0.000617003	0.000594893	0.00156
257.132	0.000618499	0.000618722	0.000597274	0.00153
259.772	0.000618885	0.000618947	0.000599611	0.00151
262.427	0.000622331	0.000622473	0.000599231	0.00149
265.094	0.000624404	0.000624494	0.000602941	0.00146
267.778	0.000624443	0.000624594	0.000605019	0.00144
270.475	0.000626829	0.000626975	0.000607445	0.00142
273.185	0.000629633	0.000629682	0.00060976	0.0014
275.911	0.000629539	0.00062975	0.000610635	0.00138
278.647	0.000632946	0.000633122	0.000613975	0.00136
281.399	0.000633204	0.00063325	0.000615311	0.00134
284.165	0.000634292	0.000634485	0.000616913	0.00132
286.942	0.000636114	0.000636177	0.000619127	0.0013
289.735	0.000637129	0.000637234	0.000619059	0.00129
292.54	0.000638314	0.000638455	0.000623152	0.00127
295.354	0.000640386	0.000640513	0.000624278	0.00125
298.182	0.000641542	0.000641712	0.000625781	0.00124
301.021	0.000642073	0.00064217	0.000627192	0.00122
303.875	0.000643891	0.000644051	0.000629123	0.0012
306.74	0.000644998	0.00064517	0.0006298	0.00119
309.615	0.000645701	0.000645799	0.000632156	0.00117
312.5	0.000648752	0.000648887	0.00063355	0.00116
315.398	0.000647935	0.000648085	0.000634891	0.00115
318.309	0.000649012	0.00064915	0.00063685	0.00113
321.229	0.000649847	0.000649949	0.000638066	0.00112
324.16	0.00065166	0.000651789	0.000639108	0.0011
327.1	0.000652325	0.000652439	0.000640916	0.00109
330.048	0.000653352	0.000653493	0.000643393	0.00108
333.01	0.000653046	0.000653227	0.000643316	0.00107
335.98	0.000654375	0.000654412	0.000644805	0.00106
338.959	0.000655638	0.000655875	0.000645411	0.00104
341.948	0.000655761	0.000655913	0.000647696	0.00103
344.944	0.000657586	0.000657738	0.000647859	0.00102
347.952	0.000657765	0.000657805	0.000648306	0.00101
350.968	0.000659205	0.000659477	0.000649182	0.000999416
353.99	0.000660623	0.000660636	0.000650306	0.000991641
357.019	0.000660928	0.000661051	0.000652944	0.00098077
360.059	0.000660543	0.000660672	0.000652577	0.00097336
363.107	0.000660792	0.000661043	0.000654258	0.000963453
366.16	0.000661956	0.000662054	0.000654257	0.000955948
369.22	0.000662726	0.000662801	0.000656752	0.000947
372.287	0.000664025	0.000664232	0.000656955	0.000937986
375.361	0.000665347	0.000665428	0.000657408	0.000929764
378.443	0.000665168	0.00066529	0.000657295	0.000923409
381.533	0.000664705	0.000664861	0.000658891	0.000915639
384.627	0.000666457	0.000666613	0.000659627	0.000907478
387.728	0.000666312	0.000666436	0.000660713	0.000901833
390.835	0.000666978	0.000667051	0.000660927	0.000894371
393.949	0.000667173	0.000667364	0.000662199	0.000887121
397.068	0.000668051	0.000668256	0.000663075	0.000880716
400.194	0.000668185	0.000668292	0.000663088	0.000874294
403.323	0.000669429	0.00066953	0.000664162	0.000868947
406.458	0.000669125	0.000669246	0.000665145	0.000863551
409.598	0.000670039	0.000670226	0.000665891	0.000856754
412.742	0.000670137	0.000670268	0.000666148	0.000852242
415.891	0.000670677	0.000670854	0.000667454	0.000846457
419.044	0.000671961	0.000672025	0.000667602	0.000840057
422.207	0.000670504	0.000670795	0.000666543	0.000836405
425.373	0.000670724	0.000670848	0.00066705	0.000832512
428.544	0.000671097	0.000671195	0.000669051	0.000826016
431.715	0.000673621	0.000673766	0.00066876	0.000821787
434.889	0.000673712	0.000673859	0.000670685	0.000817401
438.068	0.000673778	0.000673984	0.000669952	0.000813658
441.256	0.000672967	0.000673149	0.000669657	0.000808808
444.448	0.000673011	0.000673172	0.0006697	0.000805019
447.638	0.000674708	0.000674786	0.000671181	0.000801843
450.832	0.000675272	0.000675485	0.000672313	0.000797461
454.029	0.000674748	0.000674801	0.000673284	0.000794922
457.234	0.000674379	0.000674565	0.000671381	0.000790289
460.439	0.000675377	0.000675484	0.000671813	0.000788053
463.649	0.000674707	0.000674901	0.000672553	0.000784962
466.862	0.000675853	0.000676002	0.000673209	0.000779513
470.077	0.000676056	0.000676142	0.000672232	0.000778358
473.297	0.000675544	0.000675728	0.000673742	0.000774542
476.516	0.000677145	0.000677192	0.000674707	0.000771531
479.742	0.000675242	0.000675511	0.000673924	0.000769573
482.968	0.000676373	0.00067659	0.000674732	0.000766372
486.196	0.000677146	0.000677264	0.000675662	0.000763517
489.429	0.000676215	0.000676269	0.000674637	0.000762063
492.661	0.000676654	0.000676863	0.000675972	0.000759853
495.897	0.000676471	0.000676598	0.000676575	0.000756757
499.132	0.000677547	0.000677722	0.000676867	0.000755258

## Sheet: Fig 6
inj rate	Ru2Ru2OH2	Ru2Ru3OH2	Ru2Ru4OO	Ru2Ru5O	Ruu3Ru3OH2		time
per diad-s	percent	percent	percent	percent	percent		s
	100	0	0	0	0		0
58.5551	99.0099	0.98516	0	0	0.00496		0.00016994
58.5411	98.0276	1.95274	0	0	0.01967		0.00034025
58.5665	97.0527	2.90335	0	0	0.04397		0.00051086
58.5407	96.0855	3.83667	0	0	0.07783		0.00068186
58.4966	95.126	4.75296	0	0	0.12101		0.00085326
58.4874	94.1738	5.65282	0	1.66054e-07	0.17338		0.00102502
58.458	93.2287	6.5365	0	3.32108e-07	0.23484		0.00119722
58.3995	92.2907	7.40404	0	3.32108e-07	0.30523		0.00136988
58.3575	91.3601	8.25531	0	3.32108e-07	0.38457		0.00154294
58.317	90.4364	9.09095	0	4.98162e-07	0.47261		0.00171643
58.295	89.5197	9.91089	0	8.30269e-07	0.56944		0.0018903
58.2333	88.6098	10.7154	0	9.96323e-07	0.67482		0.00206464
58.1745	87.7068	11.5044	0	1.49448e-06	0.7887		0.00223944
58.066	86.8104	12.2787	0	1.66054e-06	0.9108		0.00241484
58.0149	85.9203	13.0386	0	1.82659e-06	1.04111		0.00259074
57.9194	85.037	13.783	0	2.1587e-06	1.17989		0.0027672
57.8234	84.1602	14.5131	0	2.65686e-06	1.32664		0.00294422
57.7506	83.2898	15.2287	0	3.15502e-06	1.48147		0.00312175
57.6884	82.4256	15.9304	0	3.32108e-06	1.64392		0.00329971
57.5748	81.5675	16.6185	0	4.15135e-06	1.81383		0.00347826
57.4791	80.7157	17.2924	0	5.31372e-06	1.99181		0.00365743
57.3807	79.87	17.9523	0	6.31005e-06	2.17754		0.00383718
57.2353	79.0306	18.5985	0	7.97059e-06	2.37083		0.00401762
57.1678	78.1965	19.2321	0	9.13296e-06	2.57129		0.00419859
57.0337	77.3686	19.8518	0	1.07935e-05	2.77937		0.00438022
56.8549	76.5466	20.4588	0	1.12917e-05	2.99442		0.00456263
56.7577	75.7304	21.0525	0	1.26201e-05	3.21689		0.00474565
56.6319	74.9199	21.6334	0	1.41146e-05	3.44655		0.00492932
56.5049	74.1148	22.2018	0	1.61072e-05	3.6831		0.00511366
56.3128	73.3157	22.7573	0	1.8598e-05	3.92673		0.00529884
56.2057	72.5218	23.3008	0	2.09228e-05	4.17714		0.00548465
56.091	71.7335	23.8317	0	2.42439e-05	4.4345		0.00567108
55.8641	70.951	24.3498	0	2.72328e-05	4.69886		0.00585847
55.7532	70.1732	24.8569	0	3.22145e-05	4.96952		0.00604653
55.5668	69.401	25.3514	0	3.55355e-05	5.24712		0.00623546
55.4463	68.6337	25.8349	0	3.93548e-05	5.53088		0.00642504
55.2485	67.8726	26.305	0	4.53327e-05	5.82196		0.0066155
55.0962	67.1163	26.7638	0	4.99822e-05	6.11932		0.00680673
54.9404	66.3655	27.2107	0	5.57941e-05	6.42319		0.00699872
54.7621	65.6194	27.6466	0	6.02776e-05	6.73338		0.00719162
54.5448	64.8785	28.0709	0	6.87463e-05	7.04994		0.0073855
54.3547	64.1426	28.4839	0	7.65508e-05	7.37277		0.00758029
54.1913	63.4116	28.8856	0	8.56838e-05	7.70199		0.00777595
53.9717	62.6851	29.2773	0	9.08315e-05	8.03675		0.00797258
53.7589	61.964	29.6575	0	0.000100297	8.37757		0.00817013
53.5788	61.2472	30.0274	0	0.000111422	8.72441		0.00836867
53.3952	60.5355	30.3858	0	0.000121551	9.07769		0.00856814
53.195	59.8289	30.733	0	0.000134338	9.43694		0.00876851
52.9554	59.1265	31.0707	0	0.000146293	9.80165		0.00897004
52.7279	58.4294	31.3967	0	0.00016074	10.1726		0.00917261
52.5273	57.7362	31.7135	0	0.000175021	10.549		0.00937627
52.2974	57.0477	32.02	0	0.000187641	10.9309		0.00958096
52.0377	56.364	32.3156	0	0.000202254	11.3189		0.00978692
51.8399	55.6849	32.6012	0	0.000217198	11.7124		0.00999384
51.6174	55.0103	32.8763	0	0.000232143	12.1117		0.0102019
51.3707	54.3398	33.1423	0	0.000248085	12.5161		0.0104112
51.1425	53.6738	33.3981	0	0.000265188	12.9263		0.0106216
50.8776	53.0125	33.6434	0	0.000285613	13.3422		0.0108334
50.6499	52.355	33.8801	0	0.00030886	13.7629		0.0110463
50.3698	51.7022	34.1063	0	0.000337588	14.1893		0.0112606
50.1425	51.0535	34.3232	0	0.00036233	14.621		0.0114761
49.9309	50.409	34.5308	0	0.000389064	15.0578		0.0116926
49.608	49.769	34.7284	0	0.000416629	15.5001		0.0119108
49.3952	49.133	34.9168	0	0.000447349	15.9475		0.0121302
49.0859	48.5016	35.0951	0	0.000479398	16.4005		0.0123512
48.8219	47.8739	35.2649	0	0.000507793	16.8583		0.0125735
48.5575	47.2506	35.4251	0	0.000536022	17.3212		0.0127973
48.2989	46.6313	35.5758	0	0.000568735	17.7897		0.0130225
48.0514	46.0157	35.718	0	0.000606927	18.263		0.0132492
47.7376	45.4047	35.8503	0	0.000643957	18.7415		0.0134774
47.4727	44.7975	35.9738	0	0.000680987	19.225		0.0137072
47.1906	44.1944	36.0884	0	0.000719511	19.7134		0.0139386
46.8993	43.5952	36.194	0	0.000763848	20.2068		0.0141716
46.5643	42.9999	36.291	0	0.000810177	20.705		0.0144065
46.3256	42.4083	36.3792	0	0.000850528	21.2082		0.0146428
45.9959	41.8207	36.4591	0	0.000898518	21.7157		0.014881
45.7118	41.2369	36.5303	0	0.000956304	22.2282		0.0151209
45.4164	40.6567	36.5932	0	0.00101	22.7452		0.0153625
45.1087	40.0805	36.6472	0	0.00107	23.2672		0.015606
44.8027	39.5082	36.6925	0	0.00114	23.794		0.0158514
44.4801	38.9397	36.729	0	0.00119	24.3258		0.0160988
44.1777	38.3747	36.7578	0	0.00126	24.8618		0.0163481
43.8556	37.8137	36.7776	0	0.00132	25.4027		0.0165994
43.5329	37.2569	36.7886	0	0.00139	25.9483		0.0168528
43.2118	36.7032	36.7918	0	0.00147	26.4986		0.0171083
42.9123	36.1535	36.7858	0	0.00154	27.054		0.0173659
42.5745	35.6075	36.772	0	0.00162	27.6135		0.0176256
42.2351	35.0654	36.7495	0	0.0017	28.1779		0.0178877
41.931	34.5263	36.7201	0	0.00179	28.7461		0.0181519
41.5414	33.9915	36.6815	0	0.00188	29.3193		0.0184187
41.234	33.4599	36.6352	0	0.00197	29.8968		0.0186877
40.8593	32.932	36.5809	0	0.00207	30.4788		0.0189595
40.5684	32.4073	36.5187	0	0.00217	31.0653		0.0192335
40.2189	31.8863	36.4483	0	0.00228	31.6564		0.0195101
39.8494	31.3692	36.3696	0	0.00239	32.252		0.0197894
39.516	30.8548	36.2848	0	0.0025	32.8509		0.0200713
39.1558	30.3445	36.1907	0	0.00262	33.4549		0.020356
38.7899	29.8376	36.0888	0	0.00275	34.0633		0.0206436
38.4481	29.3341	35.9795	0	0.00288	34.6758		0.020934
38.0706	28.8343	35.862	0	0.00301	35.2927		0.0212275
37.6981	28.3377	35.7372	0	0.00315	35.9137		0.0215241
37.3663	27.8443	35.6048	0	0.00329	36.5391		0.0218236
36.9793	27.3549	35.4639	0	0.00344	37.1691		0.0221265
36.617	26.8687	35.3156	0	0.0036	37.8032		0.0224326
36.247	26.3858	35.1599	0	0.00377	38.4414		0.022742
35.8737	25.9065	34.996	0	0.00395	39.0842		0.023055
35.4778	25.4303	34.825	0	0.00412	39.7308		0.0233717
35.0969	24.958	34.6456	0	0.00431	40.382		0.023692
34.7203	24.4888	34.4593	0	0.00449	41.0372		0.024016
34.3422	24.023	34.265	0	0.00469	41.6967		0.0243439
33.9628	23.5606	34.0634	0	0.00489	42.3602		0.0246756
33.5513	23.1016	33.8544	0	0.00511	43.0278		0.0250116
33.1615	22.6457	33.6383	0	0.00534	43.6992		0.0253518
32.7909	22.1933	33.414	0	0.00557	44.3754		0.0256962
32.3792	21.7443	33.1822	0	0.00581	45.0555		0.0260451
31.9879	21.2986	32.9432	0	0.00606	45.7397		0.0263986
31.5882	20.8562	32.6966	0	0.00633	46.4282		0.0267569
31.1769	20.417	32.4428	0	0.00661	47.1205		0.0271201
30.748	19.9811	32.1817	0	0.00689	47.8169		0.0274887
30.354	19.5488	31.9126	0	0.0072	48.5176		0.0278623
29.9281	19.1196	31.6364	0	0.0075	49.2224		0.0282415
29.5273	18.6938	31.3523	0	0.00783	49.9316		0.0286262
29.1219	18.2711	31.0613	0	0.00818	50.6445		0.0290165
28.6915	17.8519	30.7628	0	0.00852	51.3615		0.0294129
28.2841	17.4358	30.4572	0	0.00889	52.0825		0.0298153
27.8444	17.0229	30.1443	0	0.00926	52.8076		0.0302244
27.4358	16.6131	29.8243	1.66054e-07	0.00967	53.5366		0.0306399
27.0106	16.2067	29.4966	1.66054e-07	0.01008	54.2699		0.0310623
26.5669	15.8039	29.1611	1.66054e-07	0.01051	55.0073		0.031492
26.123	15.4047	28.8179	1.66054e-07	0.01096	55.7488		0.0319292
25.6978	15.0086	28.4674	1.66054e-07	0.01142	56.4945		0.0323741
25.2391	14.6157	28.11	1.66054e-07	0.01191	57.244		0.0328272
24.8203	14.2258	27.7453	1.66054e-07	0.0124	57.9975		0.0332884
24.3697	13.8396	27.373	1.66054e-07	0.01294	58.755		0.0337584
23.9404	13.4564	26.9936	1.66054e-07	0.01349	59.5166		0.0342372
23.4806	13.0767	26.6065	1.66054e-07	0.01405	60.2823		0.0347258
23.0162	12.7003	26.2121	1.66054e-07	0.01466	61.052		0.0352245
22.5836	12.3274	25.8096	1.66054e-07	0.01528	61.8263		0.0357332
22.1323	11.958	25.3997	1.66054e-07	0.01594	62.6046		0.0362526
21.6593	11.592	24.9819	1.66054e-07	0.01664	63.387		0.0367837
21.2156	11.2295	24.5563	3.32108e-07	0.01735	64.1738		0.0373263
20.7463	10.87	24.1239	3.32108e-07	0.01811	64.9645		0.0378817
20.2721	10.5143	23.683	3.32108e-07	0.01888	65.7598		0.0384506
19.8077	10.1614	23.2359	3.32108e-07	0.01971	66.5583		0.0390329
19.3514	9.81207	22.7809	3.32108e-07	0.02058	67.3612		0.0396296
18.8671	9.46623	22.3181	3.32108e-07	0.02149	68.1684		0.040242
18.3975	9.12381	21.8478	3.32108e-07	0.02245	68.9796		0.0408704
17.919	8.78507	21.3692	3.32108e-07	0.02347	69.7953		0.0415162
17.4436	8.44956	20.8832	4.98162e-07	0.02452	70.6151		0.04218
16.955	8.11806	20.3885	4.98162e-07	0.0256	71.4396		0.0428635
16.4689	7.79005	19.886	4.98162e-07	0.02679	72.2682		0.0435676
15.9772	7.46548	19.376	4.98162e-07	0.02803	73.101		0.0442939
15.4877	7.14472	18.8573	4.98162e-07	0.02935	73.9384		0.0450439
15	6.82759	18.3308	4.98162e-07	0.03073	74.78		0.0458187
14.5066	6.51461	17.7949	4.98162e-07	0.03219	75.6266		0.0466206
14.0013	6.20495	17.2516	4.98162e-07	0.03376	76.4774		0.0474521
13.5106	5.89908	16.7001	4.98162e-07	0.03542	77.3324		0.0483143
12.9988	5.59743	16.1392	4.98162e-07	0.03714	78.1925		0.0492112
12.4913	5.29958	15.5702	4.98162e-07	0.039	79.0567		0.0501451
11.9877	5.00561	14.9925	8.30269e-07	0.04096	79.9255		0.0511191
11.4742	4.7157	14.4057	9.96323e-07	0.0431	80.7992		0.0521377
10.9636	4.42993	13.81	9.96323e-07	0.04543	81.6776		0.0532045
10.4416	4.14828	13.2054	9.96323e-07	0.0479	82.5605		0.0543254
9.92637	3.87103	12.591	9.96323e-07	0.05056	83.4487		0.0555057
9.40083	3.59826	11.967	1.66054e-06	0.05342	84.3416		0.0567528
8.87112	3.3301	11.333	2.32475e-06	0.05654	85.2397		0.0580755
8.35114	3.06649	10.689	2.49081e-06	0.0599	86.143		0.059482
7.80836	2.80795	10.0343	3.32108e-06	0.06358	87.0516		0.0609875
7.27353	2.55411	9.36935	3.65319e-06	0.06766	87.9653		0.0626052
6.73256	2.30521	8.69411	3.98529e-06	0.07217	88.8838		0.0643542
6.19376	2.06213	8.00649	4.48345e-06	0.07719	89.8084		0.0662574
5.64447	1.82462	7.30769	5.81189e-06	0.08283	90.7379		0.068347
5.09696	1.59323	6.59577	7.14032e-06	0.08927	91.6736		0.0706644
4.54245	1.36807	5.87169	7.30637e-06	0.09668	92.6143		0.0732661
3.98474	1.14959	5.13402	7.97059e-06	0.10533	93.5605		0.0762357
3.4208	0.93858	4.38232	1.06274e-05	0.11571	94.5116		0.0796971
2.85404	0.73599	3.61542	1.44467e-05	0.12857	95.4668		0.083849
2.28222	0.54268	2.83297	1.77678e-05	0.14493	96.4248		0.0890433
1.70639	0.36118	2.03301	2.62365e-05	0.16745	97.3821		0.0959907
1.1245	0.19501	1.21781	4.08493e-05	0.2027	98.3264		0.106509
0.5337	0.05406	0.40715	8.03701e-05	0.27859	99.2001		0.128405
0.07431	2.34136e-05	0.000350208	0.000654584	0.75346	99.1847		0.261772
0.03573	3.32108e-07	1.21219e-05	0.00311	1.57694	98.3592		0.493849
0.03548	1.66054e-07	1.39485e-05	0.00739	2.39722	97.535		0.727568
0.03529	3.32108e-07	1.11256e-05	0.01359	3.21338	96.713		0.962442
0.03502	3.32108e-07	1.41146e-05	0.02171	4.02557	95.8931		1.19911
0.03483	8.30269e-07	1.57751e-05	0.03169	4.83418	95.0748		1.43708
0.03461	6.64216e-07	1.39485e-05	0.04362	5.63893	94.2585		1.6766
0.03438	1.16238e-06	1.14577e-05	0.05745	6.43982	93.444		1.91772
0.03419	6.64216e-07	1.2454e-05	0.07325	7.237	92.6318		2.16021
0.03396	8.30269e-07	1.49448e-05	0.09102	8.02992	91.8213		2.4043
0.03375	1.66054e-06	1.41146e-05	0.11073	8.81902	91.0129		2.64994
0.03352	1.66054e-06	1.47788e-05	0.13253	9.60392	90.2066		2.89719
0.03331	1.32843e-06	1.27861e-05	0.15624	10.385	89.4021		3.14604
0.03309	2.32475e-06	1.66054e-05	0.18192	11.1621	88.5997		3.39654
0.03289	1.99265e-06	1.36164e-05	0.20964	11.9351	87.7994		3.64855
0.03268	1.49448e-06	1.47788e-05	0.23946	12.704	87.0009		3.90223
0.03248	3.65319e-06	1.51109e-05	0.27148	13.4685	86.2048		4.15747
0.03225	3.65319e-06	1.74357e-05	0.30546	14.2289	85.4107		4.4145
0.03205	5.47978e-06	1.5277e-05	0.3416	14.9849	84.6188		4.67317
0.03182	4.15135e-06	1.71036e-05	0.3799	15.7368	83.8292		4.93371
0.0316	6.4761e-06	1.66054e-05	0.42025	16.4842	83.0416		5.19599
0.03141	4.48345e-06	1.46127e-05	0.46277	17.2276	82.2564		5.45998
0.03119	6.4761e-06	1.94283e-05	0.50736	17.9665	81.4731		5.72569
0.031	6.64216e-06	1.72696e-05	0.55423	18.7009	80.6921		5.99308
0.03076	7.30637e-06	2.1587e-05	0.60337	19.4309	79.9134		6.26258
0.03057	8.96691e-06	1.8598e-05	0.65473	20.1563	79.1371		6.53376
0.03033	8.6348e-06	2.25833e-05	0.70829	20.8772	78.363		6.80707
0.03013	1.12917e-05	1.79338e-05	0.76422	21.5935	77.591		7.08227
0.02993	1.29522e-05	2.27494e-05	0.8225	22.305	76.8215		7.35927
0.0297	1.02953e-05	2.12549e-05	0.88285	23.0122	76.0543		7.63845
0.02952	9.29902e-06	2.30815e-05	0.94577	23.7142	75.2897		7.91928
0.02933	1.27861e-05	2.17531e-05	1.01075	24.4122	74.5272		8.20197
0.02911	1.16238e-05	2.49081e-05	1.07793	25.1055	73.767		8.48676
0.02891	1.57751e-05	2.35797e-05	1.14783	25.7933	73.0097		8.77346
0.02868	1.47788e-05	2.60705e-05	1.21984	26.477	72.2544		9.06248
0.02848	1.69375e-05	2.44099e-05	1.29426	27.1557	71.5017		9.35354
0.0283	1.8432e-05	2.52402e-05	1.37112	27.8296	70.7512		9.64653
0.02808	1.99265e-05	2.65686e-05	1.4506	28.4981	70.0035		9.94178
0.02787	1.94283e-05	2.90594e-05	1.53236	29.1619	69.2584		10.2393
0.02766	1.87641e-05	2.60705e-05	1.61687	29.8201	68.5159		10.539
0.02747	2.20852e-05	2.65686e-05	1.70366	30.4737	67.7757		10.8407
0.02727	2.34136e-05	2.97236e-05	1.79304	31.1223	67.0382		11.1448
0.02706	2.44099e-05	3.50374e-05	1.88503	31.7653	66.3036		11.4511
0.02686	2.39118e-05	3.50374e-05	1.97971	32.4032	65.5715		11.7599
0.02664	2.50741e-05	3.4041e-05	2.0769	33.0355	64.8422		12.0711
0.02644	2.98897e-05	3.50374e-05	2.17655	33.663	64.1153		12.3847
0.02627	2.83952e-05	3.703e-05	2.27884	34.2851	63.3914		12.7003
0.02607	3.17163e-05	3.95208e-05	2.38368	34.902	62.67		13.0184
0.02588	3.15502e-05	4.28419e-05	2.49132	35.5131	61.9515		13.3388
0.02566	3.47053e-05	4.3008e-05	2.60172	36.1186	61.2359		13.6619
0.02547	3.73621e-05	3.76942e-05	2.71471	36.7187	60.5232		13.9874
0.02526	3.4041e-05	4.38382e-05	2.83043	37.3134	59.8132		14.3157
0.02506	3.71961e-05	4.56648e-05	2.94885	37.9025	59.1061		14.6465
0.02489	3.88566e-05	4.9152e-05	3.06995	38.4861	58.4017		14.9796
0.02466	4.54988e-05	4.64951e-05	3.19393	39.0636	57.7004		15.3158
0.0245	4.18456e-05	5.33033e-05	3.32108	39.6351	57.0023		15.6543
0.02429	4.36722e-05	5.42996e-05	3.45076	40.2011	56.3068		15.9957
0.0241	4.16795e-05	5.28051e-05	3.58341	40.7612	55.6145		16.3398
0.02391	4.99822e-05	5.03143e-05	3.71889	41.3152	54.9253		16.6866
0.02371	5.28051e-05	5.67904e-05	3.85723	41.8634	54.239		17.0363
0.02351	5.08125e-05	6.14399e-05	3.99886	42.4049	53.5563		17.389
0.02332	5.28051e-05	6.39307e-05	4.14333	42.9405	52.8764		17.7445
0.02314	5.72886e-05	6.26023e-05	4.29078	43.4701	52.1998		18.1029
0.02295	5.66244e-05	6.02776e-05	4.44121	43.9935	51.5263		18.4642
0.02274	6.74179e-05	6.70858e-05	4.59471	44.5105	50.8562		18.8289
0.02258	6.01115e-05	6.65876e-05	4.75131	45.021	50.1894		19.1961
0.02239	6.24363e-05	6.35986e-05	4.9108	45.5256	49.5255		19.5665
0.0222	6.44289e-05	7.22334e-05	5.07357	46.0234	48.8653		19.94
0.02201	7.10711e-05	7.02408e-05	5.2396	46.5147	48.2084		20.317
0.02181	7.37279e-05	7.3894e-05	5.40886	46.999	47.555		20.6973
0.02164	6.1772e-05	7.97059e-05	5.58106	47.4774	46.9047		21.0806
0.02145	7.33958e-05	8.21967e-05	5.75653	47.9492	46.2578		21.4674
0.02126	7.37279e-05	7.93738e-05	5.93504	48.4143	45.6144		21.8576
0.02108	7.23995e-05	9.09975e-05	6.11704	48.8724	44.9747		22.2512
0.02088	7.65508e-05	8.38572e-05	6.30239	49.3235	44.3386		22.6485
0.02072	8.10343e-05	9.14957e-05	6.49058	49.7687	43.7056		23.0489
0.02053	8.33591e-05	8.98352e-05	6.68216	50.2069	43.076		23.453
0.02036	8.6348e-05	9.29902e-05	6.87766	50.6368	42.451		23.8605
0.02017	8.88388e-05	9.38204e-05	7.07625	51.0601	41.8294		24.2717
0.01999	9.91342e-05	9.96323e-05	7.27823	51.4765	41.2113		24.6867
0.01983	9.2492e-05	0.000102123	7.48368	51.8858	40.5969		25.1052
0.01962	9.78057e-05	0.000100297	7.69248	52.2878	39.9864		25.528
0.01947	9.64773e-05	0.000105444	7.90498	52.6821	39.3799		25.9542
0.01929	0.000101625	0.00010395	8.12082	53.0696	38.7769		26.3843
0.0191	0.000112917	0.000113415	8.33989	53.4498	38.1778		26.8186
0.01891	0.000113581	0.000111256	8.56277	53.8222	37.5828		27.2574
0.01875	0.000119061	0.000115241	8.78925	54.1873	36.9916		27.7
0.01858	0.000110758	0.000117732	9.01947	54.5444	36.4046		28.1468
0.0184	0.000111588	0.000125371	9.25328	54.894	35.8214		28.5978
0.01824	0.000119725	0.000133507	9.49079	55.2359	35.2423		29.0529
0.01806	0.000125371	0.000125039	9.73191	55.5699	34.6674		29.5125
0.0179	0.000128692	0.000127197	9.97677	55.8964	34.0964		29.9762
0.01773	0.000126367	0.000141478	10.2251	56.215	33.5299		30.4445
0.01756	0.000139153	0.00013633	10.4769	56.5264	32.9669		30.9173
0.01738	0.000142972	0.000134836	10.7333	56.8285	32.4087		31.395
0.01722	0.000146626	0.000146293	10.9928	57.1234	31.8545		31.8773
0.01705	0.000144301	0.000154762	11.2565	57.4096	31.305		32.3641
0.01688	0.000141644	0.000151773	11.5239	57.6876	30.7598		32.856
0.01671	0.000153434	0.000157087	11.7952	57.9572	30.2192		33.3528
0.01655	0.000150943	0.000163563	12.0704	58.2188	29.6827		33.8545
0.0164	0.00015443	0.000163065	12.3497	58.4716	29.151		34.3609
0.01621	0.000161404	0.000154098	12.6327	58.7164	28.6233		34.8731
0.01606	0.000166054	0.00015991	12.9201	58.952	28.1006		35.3904
0.0159	0.000169873	0.000169043	13.211	59.18	27.5822		35.9128
0.01574	0.000179006	0.000165058	13.5062	59.3985	27.0685		36.4405
0.01558	0.000173194	0.00018598	13.8053	59.6087	26.5595		36.9737
0.01543	0.000186146	0.000183656	14.1087	59.8097	26.0554		37.5122
0.01527	0.000185316	0.000182825	14.4159	60.0023	25.5558		38.0563
0.01511	0.000197438	0.0001898	14.7272	60.1862	25.061		38.6061
0.01495	0.000196608	0.000193453	15.0424	60.3613	24.5709		39.1618
0.01479	0.000202088	0.000191626	15.3621	60.5272	24.0856		39.7238
0.01465	0.00020242	0.000203084	15.6855	60.6849	23.6048		40.2911
0.01449	0.000199099	0.000206903	16.0134	60.8323	23.1296		40.8647
0.01435	0.000216866	0.00020408	16.3451	60.9717	22.6588		41.4439
0.01419	0.00020873	0.000217032	16.6809	61.1018	22.1932		42.0297
0.01404	0.000218693	0.000221848	17.0209	61.2227	21.7325		42.6217
0.0139	0.000216534	0.000223509	17.3653	61.3341	21.277		43.2198
0.01376	0.000229819	0.000231479	17.7137	61.4367	20.8264		43.8242
0.01359	0.000228988	0.000234136	18.0664	61.5296	20.3809		44.436
0.01345	0.00023563	0.000252734	18.423	61.6138	19.9404		45.0544
0.01331	0.000235298	0.000247752	18.784	61.6879	19.5054		45.6793
0.01316	0.000247586	0.00024742	19.1496	61.7523	19.0757		46.3116
0.01303	0.000244431	0.000261369	19.519	61.8078	18.651		46.9502
0.01288	0.000251738	0.00024576	19.8929	61.8533	18.2318		47.5962
0.01274	0.000264856	0.000267015	20.2708	61.8899	17.8177		48.2495
0.0126	0.000264856	0.00027183	20.6533	61.9161	17.4092		48.9099
0.01247	0.000264192	0.000272328	21.0401	61.9325	17.0063		49.5773
0.01232	0.000271498	0.000278804	21.431	61.9394	16.6087		50.253
0.01218	0.000279967	0.000277144	21.8262	61.9365	16.2166		50.9363
0.01206	0.000273325	0.00029076	22.2256	61.9245	15.8295		51.6268
0.01193	0.000292919	0.00029458	22.6292	61.9026	15.448		52.325
0.01179	0.000291923	0.00029458	23.0371	61.8707	15.0723		53.0314
0.01165	0.000303713	0.000293915	23.4493	61.8293	14.7016		53.7467
0.01153	0.000305041	0.000305373	23.8654	61.7782	14.3368		54.4696
0.01139	0.000308362	0.000304875	24.2849	61.7186	13.9771		55.2009
0.01127	0.000323971	0.000314008	24.7095	61.6482	13.6232		55.9404
0.01114	0.000327624	0.000324469	25.1381	61.5678	13.2752		56.6885
0.01101	0.000322975	0.000319654	25.5708	61.4782	12.9323		57.4458
0.01088	0.000335263	0.000343233	26.0075	61.3784	12.5955		58.2121
0.01076	0.000346887	0.000343067	26.4484	61.2693	12.2641		58.987
0.01064	0.000335263	0.000347883	26.8934	61.1501	11.9386		59.7712
0.01052	0.000355189	0.000345724	27.3424	61.0211	11.6187		60.5643
0.0104	0.00035851	0.000355023	27.7953	60.8831	11.304		61.3668
0.01028	0.000371795	0.000361333	28.2517	60.7355	10.9954		62.1784
0.01017	0.000369304	0.00036399	28.7121	60.5784	10.6922		62.9994
0.01005	0.000376278	0.000365485	29.1767	60.4115	10.3948		63.8301
0.00993	0.000380097	0.000374618	29.6452	60.2348	10.1031		64.6714
0.00981	0.000388234	0.000399858	30.1174	60.0487	9.81715		65.5226
0.00971	0.00039471	0.00039554	30.5933	59.8532	9.53702		66.3831
0.00959	0.000400522	0.000407994	31.0732	59.6477	9.26279		67.2542
0.00948	0.000394544	0.000419618	31.5567	59.4338	8.9935		68.136
0.00937	0.000416131	0.000428751	32.0431	59.2107	8.73029		69.0277
0.00927	0.000425762	0.000419784	32.5335	58.9783	8.47244		69.93
0.00916	0.000422773	0.00041364	33.0275	58.7365	8.22047		70.8436
0.00905	0.000434729	0.000427589	33.5241	58.4866	7.97394		71.7678
0.00895	0.000435891	0.000435393	34.0244	58.2271	7.73338		72.7031
0.00885	0.000438216	0.000434231	34.5281	57.9585	7.49832		73.6493
0.00875	0.000451501	0.000457312	35.0345	57.6821	7.26852		74.6062
0.00865	0.000453659	0.000452663	35.5447	57.3961	7.0446		75.5751
0.00854	0.000462792	0.000449342	36.0574	57.1021	6.82608		76.5558
0.00844	0.00047342	0.000471095	36.573	56.7999	6.61281		77.5478
0.00834	0.000476076	0.000488531	37.0917	56.4886	6.40539		78.553
0.00824	0.000484545	0.000474084	37.6135	56.1695	6.20308		79.5702
0.00815	0.000501483	0.000488697	38.1377	55.842	6.00646		80.5985
0.00807	0.000508291	0.000498992	38.6637	55.5076	5.81496		81.6388
0.00797	0.000519251	0.00049949	39.1926	55.1649	5.62902		82.6919
0.00787	0.000508457	0.000500154	39.7241	54.8147	5.44782		83.7584
0.00778	0.000507627	0.00049866	40.2576	54.457	5.27217		84.8371
0.00769	0.000529878	0.000529214	40.7936	54.0921	5.10131		85.9285
0.0076	0.000530044	0.000527553	41.3309	53.7206	4.93548		87.0334
0.00752	0.00054117	0.000553292	41.8708	53.341	4.77534		88.1515
0.00744	0.000536188	0.000550469	42.4115	52.9559	4.61993		89.2825
0.00735	0.000557609	0.00053104	42.955	52.563	4.46951		90.4266
0.00727	0.000562092	0.000559103	43.4999	52.164	4.32386		91.584
0.00718	0.000550303	0.000579694	44.0461	51.759	4.1828		92.7563
0.00711	0.000587997	0.000571724	44.5931	51.3484	4.04645		93.9401
0.00702	0.00058451	0.000571059	45.1416	50.9316	3.91483		95.1397
0.00695	0.000597296	0.000570229	45.6909	50.5094	3.78786		96.3516
0.00687	0.000588661	0.000580358	46.2409	50.0821	3.66534		97.5792
0.00679	0.00060261	0.000601945	46.7917	49.6495	3.54723		98.8208
0.00672	0.000605266	0.000612241	47.3439	49.2111	3.4337		100.076
0.00664	0.000612905	0.000604602	47.8961	48.7684	3.32429		101.347
0.00657	0.000625857	0.000631171	48.4489	48.3204	3.21947		102.632
0.0065	0.000613569	0.000631005	49.0016	47.8689	3.11857		103.932
0.00643	0.000627186	0.000638643	49.5548	47.4123	3.02207		105.246
0.00636	0.000644621	0.000641798	50.1076	46.9522	2.92949		106.577
0.00629	0.000622204	0.00064047	50.6602	46.4884	2.84087		107.922
0.00622	0.000645119	0.000692113	51.2124	46.0211	2.75596		109.282
0.00616	0.000666042	0.000676171	51.7635	45.5516	2.6744		110.657
0.00609	0.000677832	0.000685304	52.314	45.079	2.59659		112.048
0.00602	0.000681651	0.000674677	52.8641	44.603	2.52271		113.455
0.00596	0.000696596	0.000698091	53.4131	44.1246	2.45212		114.877
0.0059	0.000683976	0.000686301	53.9606	43.6444	2.38498		116.314
0.00584	0.000699087	0.000697094	54.5073	43.1622	2.32059		117.767
0.00578	0.000704401	0.000706725	55.0525	42.678	2.25976		119.237
0.00572	0.000701246	0.000736117	55.5963	42.1919	2.20209		120.723
0.00566	0.000722168	0.000707224	56.1382	41.7047	2.14748		122.225
0.0056	0.000711707	0.000720176	56.6783	41.2164	2.09577		123.743
0.00554	0.000743921	0.000726818	57.2165	40.7268	2.04711		125.278
0.00549	0.000752888	0.000727482	57.7529	40.2368	2.001		126.829
0.00543	0.000718681	0.000739438	58.2865	39.7466	1.95773		128.397
0.00537	0.000764346	0.000758534	58.8182	39.2563	1.91642		129.982
0.00533	0.00074608	0.000772815	59.3468	38.7663	1.87784		131.583
0.00527	0.00075953	0.000784605	59.8726	38.2766	1.84183		133.201
0.00522	0.000758534	0.000763018	60.396	37.787	1.80813		134.835
0.00517	0.000791247	0.000764512	60.9164	37.2981	1.77666		136.488
0.00512	0.000806358	0.000795896	61.4337	36.81	1.74763		138.157
0.00507	0.000792409	0.000795896	61.9482	36.3228	1.72033		139.842
0.00501	0.000791247	0.000804199	62.4592	35.8374	1.69489		141.548
0.00497	0.000808184	0.000792575	62.9665	35.3535	1.67158		143.268
0.00493	0.000805029	0.000808848	63.47	34.8716	1.6501		145.007
0.00488	0.000831764	0.000816653	63.9697	34.3917	1.63032		146.762
0.00484	0.000834919	0.000809513	64.4659	33.9138	1.61214		148.535
0.00479	0.000841561	0.000840399	64.9579	33.4387	1.59534		150.327
0.00475	0.000835251	0.000846377	65.4453	32.9661	1.58044		152.135
0.0047	0.00083276	0.000827447	65.9295	32.4954	1.5671		153.961
0.00466	0.000872613	0.000855178	66.4087	32.0284	1.55505		155.806
0.00462	0.000845048	0.000865971	66.884	31.564	1.54415		157.667
0.00458	0.000848369	0.0008761	67.3548	31.1026	1.53473		159.547
0.00454	0.000870787	0.000854513	67.8209	30.6454	1.52604		161.444
0.0045	0.000879753	0.00088872	68.2821	30.1915	1.5187		163.359
0.00446	0.000891543	0.000872115	68.7387	29.741	1.51279		165.293
0.00442	0.000893536	0.000880916	69.1907	29.2939	1.50792		167.244
0.00438	0.000902835	0.000873443	69.6381	28.8509	1.50351		169.213
0.00434	0.000901174	0.000893038	70.0801	28.4122	1.50028		171.201
0.00431	0.000915953	0.00090599	70.5172	27.9777	1.49768		173.206
0.00427	0.000909809	0.000908481	70.9492	27.5478	1.49584		175.23
0.00424	0.000927245	0.0009123	71.376	27.122	1.49482		177.272
0.0042	0.000928407	0.000922097	71.7972	26.7009	1.49467		179.332
0.00417	0.000897853	0.000930732	72.2134	26.2845	1.49503		181.409
0.00413	0.000930068	0.000939201	72.6247	25.8724	1.49593		183.505
0.0041	0.00093123	0.000931894	73.03	25.4656	1.4974		185.618
0.00407	0.000951157	0.000942024	73.4302	25.0637	1.49913		187.748
0.00404	0.000941027	0.000936046	73.8251	24.6663	1.50175		189.898
0.00401	0.000971747	0.000954312	74.2141	24.2742	1.50486		192.066
0.00398	0.000953481	0.000968758	74.5975	23.8879	1.50786		194.251
0.00395	0.000970585	0.000979552	74.9752	23.5064	1.51172		196.454
0.00392	0.00096909	0.000974736	75.3472	23.1302	1.51587		198.676
0.00389	0.000974736	0.000978888	75.7139	22.7595	1.52011		200.915
0.00386	0.000975068	0.000969423	76.0739	22.3943	1.52524		203.171
0.00384	0.000983537	0.000992836	76.4287	22.0343	1.53045		205.445
0.00381	0.00099101	0.000980714	76.778	21.6799	1.53561		207.738
0.00378	0.000978057	0.00097374	77.1213	21.3314	1.54092		210.047
0.00375	0.000999478	0.000978223	77.4594	20.9883	1.5459		212.374
0.00373	0.000996157	0.00101	77.7913	20.6504	1.5519		214.718
0.0037	0.001	0.00101	78.1184	20.3176	1.55769		217.081
0.00368	0.000995659	0.000997652	78.4388	19.9913	1.56372		219.461
0.00365	0.001	0.000996655	78.7536	19.6705	1.56972		221.858
0.00363	0.00102	0.00103	79.0629	19.3549	1.57592		224.271
0.00361	0.001	0.00103	79.3665	19.045	1.58237		226.702
0.00359	0.00104	0.00101	79.6641	18.7412	1.58862		229.148
0.00356	0.00104	0.00102	79.9569	18.4421	1.59481		231.612
0.00354	0.00105	0.00103	80.2433	18.1496	1.60101		234.091
0.00352	0.00102	0.00102	80.524	17.8624	1.60758		236.586
0.0035	0.00104	0.00103	80.7992	17.5807	1.61415		239.1
0.00348	0.00106	0.00102	81.0692	17.3044	1.62043		241.631
0.00346	0.00104	0.00106	81.3337	17.0333	1.62701		244.176
0.00344	0.00104	0.00106	81.5924	16.7681	1.63355		246.735
0.00342	0.00105	0.00104	81.8459	16.5086	1.63967		249.311
0.0034	0.00106	0.00108	82.0943	16.2541	1.64569		251.903
0.00338	0.00105	0.00107	82.3374	16.005	1.65175		254.51
0.00337	0.00106	0.00105	82.5751	15.7615	1.6577		257.132
0.00334	0.00108	0.00107	82.808	15.5232	1.66309		259.772
0.00333	0.00107	0.00106	83.0352	15.2895	1.66951		262.427
0.00332	0.00106	0.00107	83.2572	15.0616	1.67557		265.094
0.0033	0.00105	0.00107	83.4749	14.8384	1.68108		267.778
0.00328	0.00109	0.00106	83.6871	14.6207	1.68664		270.475
0.00327	0.0011	0.00109	83.8939	14.4082	1.69232		273.185
0.00325	0.00106	0.00107	84.0965	14.2002	1.69779		275.911
0.00324	0.00107	0.00106	84.2937	13.9976	1.7033		278.647
0.00322	0.00109	0.00108	84.4865	13.7995	1.7085		281.399
0.00321	0.00108	0.00107	84.6748	13.6062	1.71364		284.165
0.0032	0.00108	0.00109	84.8585	13.4175	1.7186		286.942
0.00318	0.00108	0.0011	85.0378	13.2329	1.72394		289.735
0.00317	0.00109	0.0011	85.2126	13.0534	1.7285		292.54
0.00316	0.0011	0.0011	85.383	12.8783	1.73332		295.354
0.00314	0.00108	0.0011	85.5491	12.7075	1.73805		298.182
0.00313	0.0011	0.00111	85.7114	12.5406	1.74254		301.021
0.00312	0.0011	0.0011	85.8689	12.3788	1.74706		303.875
0.00311	0.0011	0.00109	86.0226	12.2205	1.75173		306.74
0.0031	0.0011	0.0011	86.1726	12.0662	1.75591		309.615
0.00309	0.00108	0.0011	86.3175	11.9167	1.76055		312.5
0.00308	0.00109	0.0011	86.4596	11.7706	1.76459		315.398
0.00306	0.00109	0.0011	86.5972	11.6292	1.76838		318.309
0.00305	0.00109	0.00111	86.7316	11.4911	1.77211		321.229
0.00304	0.00113	0.00112	86.8615	11.3572	1.77603		324.16
0.00304	0.0011	0.00112	86.9882	11.227	1.77965		327.1
0.00303	0.00112	0.00112	87.1115	11.1005	1.78287		330.048
0.00302	0.00113	0.00111	87.2317	10.9771	1.78602		333.01
0.00301	0.00111	0.00114	87.3488	10.857	1.78908		335.98
0.003	0.00114	0.00111	87.462	10.7405	1.79242		338.959
0.00299	0.00114	0.00111	87.5724	10.6273	1.79509		341.948
0.00299	0.00109	0.0011	87.6797	10.517	1.79824		344.944
0.00297	0.00114	0.00113	87.7836	10.41	1.80132		347.952
0.00297	0.0011	0.0011	87.8842	10.3062	1.80463		350.968
0.00296	0.00113	0.00113	87.982	10.205	1.80794		353.99
0.00296	0.00112	0.00114	88.0768	10.1075	1.8106		357.019
0.00295	0.00114	0.00114	88.1697	10.012	1.81329		360.059
0.00294	0.00112	0.0011	88.2598	9.91961	1.81555		363.107
0.00293	0.00113	0.00112	88.3474	9.82942	1.81813		366.16
0.00293	0.00116	0.00114	88.4322	9.7426	1.82016		369.22
0.00292	0.00114	0.00112	88.5142	9.65826	1.8226		372.287
0.00292	0.00117	0.00113	88.5932	9.57651	1.82525		375.361
0.00291	0.00113	0.00114	88.6707	9.49645	1.8279		378.443
0.0029	0.00113	0.00113	88.746	9.41905	1.82995		381.533
0.0029	0.00116	0.00113	88.8184	9.34435	1.83228		384.627
0.0029	0.00114	0.00114	88.8892	9.27156	1.83427		387.728
0.00289	0.00114	0.00117	88.9577	9.20101	1.83631		390.835
0.00288	0.00113	0.00115	89.024	9.13296	1.83815		393.949
0.00288	0.00113	0.00114	89.0881	9.0671	1.83994		397.068
0.00287	0.00117	0.00115	89.1502	9.0031	1.84174		400.194
0.00287	0.00115	0.00115	89.2104	8.94106	1.8436		403.323
0.00287	0.00113	0.00116	89.2691	8.8809	1.84509		406.458
0.00286	0.00115	0.00115	89.3255	8.82298	1.84659		409.598
0.00286	0.00115	0.00115	89.3805	8.76651	1.84806		412.742
0.00286	0.00114	0.00115	89.4337	8.71216	1.84932		415.891
0.00285	0.00115	0.00117	89.4844	8.65984	1.85089		419.044
0.00284	0.00116	0.00113	89.5346	8.60815	1.85234		422.207
0.00284	0.00114	0.00113	89.5836	8.55782	1.85375		425.373
0.00284	0.00115	0.00115	89.6304	8.51009	1.85459		428.544
0.00284	0.00116	0.00115	89.6751	8.46367	1.85635		431.715
0.00284	0.00114	0.00116	89.7185	8.41917	1.85756		434.889
0.00283	0.00117	0.00114	89.7606	8.37556	1.859		438.068
0.00282	0.00116	0.00113	89.8016	8.33332	1.86022		441.256
0.00282	0.00115	0.00113	89.8415	8.29221	1.86151		444.448
0.00282	0.00114	0.00115	89.8797	8.25264	1.86282		447.638
0.00282	0.00116	0.00113	89.9165	8.21473	1.86403		450.832
0.00282	0.00117	0.00116	89.9526	8.17792	1.86468		454.029
0.00281	0.00116	0.00115	89.9874	8.14193	1.86587		457.234
0.00281	0.00116	0.00116	90.0212	8.10677	1.86721		460.439
0.00281	0.00114	0.00115	90.0543	8.0728	1.86812		463.649
0.0028	0.00118	0.00114	90.0853	8.04069	1.86919		466.862
0.0028	0.00117	0.00116	90.1159	8.00866	1.8706		470.077
0.0028	0.00118	0.00115	90.1455	7.97832	1.8714		473.297
0.0028	0.00114	0.00118	90.1736	7.94928	1.87234		476.516
0.00279	0.00115	0.00114	90.2017	7.92055	1.87302		479.742
0.00279	0.00114	0.00113	90.2284	7.89314	1.87378		482.968
0.00279	0.00115	0.00114	90.2539	7.8669	1.87443		486.196
0.00279	0.00115	0.00116	90.2793	7.84077	1.87514		489.429
0.00279	0.00114	0.00115	90.3039	7.81576	1.87556		492.661
0.00279	0.00117	0.00115	90.3275	7.79199	1.8757		495.897
0.00279	0.00114	0.00114	90.3504	7.76879	1.87618		499.132
0.00278	0.00114	0.00118	90.3721	7.74643	1.87673		502.374
0.00278	0.00115	0.00114	90.3929	7.72434	1.87803		505.616
0.00278	0.00117	0.00113	90.4131	7.70325	1.87894		508.86
0.00278	0.00116	0.0012	90.4325	7.68296	1.87978		512.105
0.00278	0.00117	0.00114	90.4519	7.66331	1.88005		515.353
0.00278	0.00116	0.00115	90.4702	7.64412	1.8809		518.602
0.00277	0.00116	0.00114	90.488	7.62578	1.88147		521.854
0.00278	0.00114	0.00118	90.5045	7.60882	1.8819		525.104
0.00277	0.00118	0.00115	90.5214	7.59139	1.8825		528.361
0.00277	0.00118	0.00116	90.537	7.57526	1.883		531.617
0.00277	0.00115	0.00115	90.5525	7.55902	1.88374		534.87
0.00277	0.00117	0.00117	90.5676	7.5441	1.88355		538.131
0.00277	0.00116	0.00115	90.5821	7.5293	1.88387		541.39
0.00277	0.00116	0.00117	90.596	7.5149	1.88443		544.652
0.00277	0.00113	0.00115	90.6094	7.50128	1.88457		547.916
0.00276	0.00115	0.00116	90.6224	7.48791	1.88493		551.18
0.00277	0.00117	0.00116	90.6352	7.47467	1.88541		554.445
0.00276	0.00115	0.00116	90.6479	7.46219	1.88517		557.711
0.00276	0.00116	0.00117	90.6598	7.4499	1.88567		560.98
0.00276	0.00118	0.00114	90.6712	7.43816	1.88592		564.251
0.00276	0.00117	0.00116	90.6818	7.42714	1.88629		567.523
0.00276	0.00115	0.00116	90.6922	7.41629	1.88679		570.796
0.00276	0.00112	0.00117	90.7022	7.40614	1.88691		574.067
0.00276	0.00118	0.00116	90.7118	7.39645	1.88704		577.339
0.00276	0.00116	0.00115	90.721	7.3869	1.88741		580.612
0.00276	0.00117	0.00113	90.7306	7.37745	1.88727		583.889
0.00276	0.00115	0.00117	90.7391	7.36842	1.88773		587.165
0.00275	0.00116	0.00117	90.7477	7.35959	1.88803		590.444
0.00275	0.00115	0.00117	90.756	7.35062	1.88868		593.724
0.00275	0.00117	0.00116	90.7645	7.34237	1.88835		597.006
0.00276	0.00117	0.00115	90.7723	7.33384	1.88916		600.284
0.00275	0.00116	0.00118	90.7803	7.32584	1.88911		603.565
0.00275	0.00118	0.00116	90.7869	7.31869	1.88973		606.844
0.00275	0.0012	0.00116	90.7939	7.31135	1.88999		610.124
0.00275	0.00115	0.00116	90.801	7.30439	1.89001		613.406
0.00275	0.00115	0.00117	90.8077	7.29724	1.89038		616.691
0.00275	0.00117	0.00117	90.8142	7.29062	1.89041		619.977
0.00275	0.00117	0.00117	90.8198	7.2846	1.89086		623.261
0.00275	0.00113	0.00118	90.8258	7.27835	1.89112		626.546
0.00275	0.00118	0.00117	90.8309	7.27284	1.89158		629.831
0.00275	0.00115	0.00117	90.8363	7.26696	1.89206		633.117
0.00275	0.00115	0.00117	90.8415	7.26171	1.89209		636.403
0.00275	0.00119	0.00117	90.8467	7.25628	1.89231		639.692
0.00275	0.00116	0.00116	90.8517	7.25122	1.89235		642.978
0.00275	0.00116	0.00118	90.8565	7.24622	1.8926		646.265
0.00275	0.00117	0.00117	90.8616	7.24135	1.89231		649.553
0.00275	0.00117	0.00117	90.8661	7.23672	1.89243		652.844
0.00274	0.00114	0.00116	90.8704	7.23244	1.89254		656.137
0.00275	0.00119	0.00117	90.8741	7.22883	1.89233		659.426
0.00275	0.00117	0.00115	90.878	7.2249	1.89245		662.714
0.00275	0.00118	0.00116	90.8821	7.22072	1.89244		666.004
0.00275	0.00115	0.00118	90.8862	7.21655	1.89261		669.294
0.00275	0.00116	0.00117	90.8899	7.21216	1.89328		672.584
0.00275	0.00116	0.00117	90.8934	7.20813	1.89371		675.874
0.00275	0.00115	0.00116	90.8964	7.20521	1.89372		679.163
0.00274	0.00114	0.00119	90.8993	7.20218	1.89381		682.455
0.00274	0.00117	0.00116	90.9024	7.19901	1.89393		685.748
0.00275	0.0012	0.00115	90.9056	7.19576	1.89394		689.038
0.00274	0.00117	0.00116	90.9088	7.19284	1.89371		692.331
0.00274	0.00116	0.00118	90.9118	7.18979	1.89368		695.625
0.00274	0.00117	0.00115	90.9147	7.18687	1.89372		698.922
0.00274	0.00118	0.00115	90.9167	7.18448	1.89411		702.215
0.00274	0.00116	0.00118	90.9193	7.18182	1.89419		705.51
0.00274	0.00116	0.00118	90.9218	7.17917	1.89436		708.804
0.00275	0.0012	0.00116	90.9243	7.17688	1.89414		712.094
0.00274	0.00119	0.00115	90.9266	7.17444	1.89421		715.39
0.00274	0.00114	0.00115	90.9284	7.17246	1.89452		718.684
0.00274	0.00114	0.00118	90.9306	7.17054	1.89419		721.98
0.00274	0.00117	0.00119	90.9324	7.16854	1.89432		725.276
0.00274	0.00117	0.00116	90.9344	7.1665	1.89443		728.572
0.00274	0.00118	0.00116	90.9365	7.16429	1.89452		731.868
0.00274	0.00118	0.00116	90.9384	7.16211	1.89476		735.162
0.00274	0.00117	0.00116	90.9402	7.16019	1.8949		738.455
0.00274	0.00114	0.00115	90.9417	7.15858	1.8951		741.755
0.00274	0.00115	0.00117	90.9429	7.15682	1.89558		745.049
0.00274	0.00117	0.00115	90.9444	7.15562	1.89531		748.345
0.00274	0.00116	0.00114	90.946	7.15457	1.89474		751.638
0.00274	0.00116	0.00117	90.9472	7.15318	1.89495		754.932
0.00274	0.00114	0.00118	90.9494	7.15168	1.89421		758.229
0.00274	0.00118	0.00117	90.9505	7.15049	1.89429		761.527
0.00274	0.00115	0.00117	90.952	7.1487	1.89464		764.822
0.00274	0.00114	0.00117	90.9534	7.14762	1.89432		768.121
0.00274	0.00115	0.00116	90.9546	7.14629	1.89444		771.418
0.00274	0.00115	0.00115	90.956	7.14502	1.89438		774.719
0.00274	0.00117	0.00118	90.9567	7.14418	1.8944		778.017
0.00274	0.00115	0.00117	90.958	7.14283	1.89447		781.314
0.00274	0.00117	0.00116	90.959	7.1415	1.89481		784.612
0.00274	0.00116	0.00114	90.9606	7.13994	1.89484		787.911
0.00274	0.00117	0.00114	90.9617	7.13917	1.89443		791.207
0.00274	0.00116	0.00115	90.9629	7.13793	1.89454		794.505
0.00274	0.00114	0.00119	90.9639	7.13668	1.89475		797.802
0.00274	0.00116	0.00117	90.9648	7.13577	1.8947		801.098
0.00274	0.00117	0.00117	90.9658	7.13476	1.89472		804.396
0.00274	0.00115	0.00116	90.9669	7.1338	1.89463		807.697
0.00274	0.00118	0.00115	90.9677	7.13301	1.89466		810.995
0.00274	0.00117	0.00115	90.9682	7.13201	1.89505		814.296
0.00274	0.00116	0.00115	90.9686	7.13133	1.89539		817.593
0.00274	0.00118	0.00116	90.9692	7.13017	1.89593		820.891
0.00274	0.00117	0.00118	90.9695	7.12951	1.8963		824.187
0.00274	0.00117	0.00117	90.9702	7.1288	1.89632		827.487
0.00274	0.00115	0.00118	90.971	7.12799	1.8963		830.784
0.00274	0.00118	0.00115	90.9719	7.12741	1.89605		834.081
0.00274	0.00118	0.00118	90.9727	7.12704	1.89558		837.382
0.00274	0.00116	0.00119	90.9734	7.12595	1.89591		840.68
0.00274	0.00115	0.00117	90.9739	7.12545	1.896		843.979
0.00274	0.00117	0.00116	90.9743	7.12477	1.89622		847.278
0.00274	0.00117	0.00116	90.9744	7.12472	1.89615		850.575
0.00274	0.00117	0.00116	90.9746	7.12416	1.89658		853.874
0.00274	0.00115	0.00116	90.9745	7.1245	1.8964		857.174
0.00274	0.00121	0.00117	90.9749	7.12409	1.89626		860.476
0.00274	0.00116	0.00118	90.9757	7.12384	1.89575		863.774
0.00274	0.00117	0.00119	90.9762	7.12306	1.89601		867.072
0.00274	0.00119	0.00118	90.9768	7.12262	1.89588		870.373
0.00274	0.00114	0.00113	90.9781	7.12174	1.89561		873.674
0.00274	0.00117	0.00117	90.9787	7.12136	1.89526		876.975
0.00274	0.00116	0.00115	90.9796	7.12122	1.89454		880.278
0.00274	0.00117	0.00115	90.9801	7.12052	1.89474		883.58
0.00274	0.00114	0.00117	90.9804	7.1198	1.8951		886.88
0.00274	0.00116	0.00117	90.9806	7.11909	1.89565		890.179
0.00274	0.00118	0.00116	90.9811	7.11861	1.89561		893.48
0.00274	0.00117	0.00118	90.9812	7.1183	1.8958		896.777
0.00274	0.00117	0.00119	90.9814	7.11777	1.89609		900.078
0.00274	0.00117	0.00118	90.9812	7.118	1.89606		903.379
0.00274	0.00116	0.00114	90.9818	7.11788	1.89568		906.678
0.00274	0.00117	0.00117	90.9817	7.11767	1.89589		909.977
0.00274	0.00117	0.00119	90.982	7.11794	1.89535		913.278
0.00274	0.00117	0.00118	90.9815	7.11823	1.89562		916.576
0.00274	0.00116	0.00117	90.9821	7.11785	1.89533		919.876
0.00274	0.00115	0.00117	90.9826	7.1176	1.89515		923.177
0.00274	0.00117	0.0012	90.9826	7.11704	1.8956		926.478
0.00274	0.00116	0.00117	90.9824	7.11681	1.8961		929.777
0.00274	0.00118	0.00117	90.9828	7.11632	1.8962		933.077
0.00274	0.00116	0.00117	90.9829	7.11616	1.89627		936.376
0.00274	0.00119	0.00117	90.9835	7.1157	1.8961		939.678
0.00274	0.00117	0.00117	90.9838	7.1155	1.89599		942.977
0.00274	0.00116	0.00119	90.9843	7.11542	1.89559		946.278
0.00274	0.00114	0.00117	90.9851	7.11471	1.89554		949.578
0.00274	0.00118	0.00115	90.985	7.11487	1.89548		952.879
0.00273	0.00116	0.00116	90.9851	7.11472	1.89552		956.183
0.00274	0.00116	0.00118	90.9856	7.11401	1.8957		959.48
0.00274	0.00118	0.00117	90.9857	7.11425	1.89538		962.781
0.00274	0.00116	0.00119	90.9858	7.11431	1.89518		966.083
0.00274	0.00116	0.00117	90.9858	7.11396	1.89563		969.384
0.00274	0.00116	0.00118	90.9863	7.11344	1.89548		972.688
0.00274	0.00117	0.00119	90.986	7.11387	1.89545		975.989
0.00274	0.00115	0.00117	90.986	7.11354	1.89583		979.286
0.00274	0.00117	0.00115	90.9863	7.11326	1.89577		982.588
0.00274	0.00117	0.00117	90.9861	7.11337	1.89587		985.888
0.00274	0.00115	0.00116	90.9869	7.11309	1.89538		989.191
0.00274	0.00113	0.00118	90.9874	7.11253	1.89542		992.493
0.00274	0.00117	0.00117	90.9881	7.11219	1.89503		995.795
0.00274	0.00115	0.00116	90.9882	7.11213	1.89499		999.097
0.00274	0.00117	0.00117	90.9884	7.11167	1.89523		1002.4
0.00274	0.00116	0.00118	90.9887	7.11102	1.89554		1005.7
0.00274	0.00118	0.00116	90.9891	7.11045	1.89577		1009
0.00274	0.00116	0.0012	90.9894	7.11026	1.89562		1012.3
0.00274	0.00116	0.00116	90.9896	7.10993	1.89577		1015.6
0.00274	0.00115	0.00118	90.9894	7.11005	1.89588		1018.9
0.00274	0.00119	0.00115	90.9892	7.11009	1.896		1022.21
0.00274	0.00119	0.00115	90.9891	7.11028	1.8959		1025.51
0.00274	0.00117	0.00117	90.9892	7.11005	1.8961		1028.81
0.00273	0.00117	0.00115	90.9896	7.10983	1.89593		1032.12
0.00274	0.00115	0.00117	90.9893	7.10986	1.8962		1035.42
0.00274	0.00117	0.00117	90.9893	7.10992	1.89611		1038.72
0.00274	0.00116	0.00113	90.9888	7.11029	1.89626		1042.02
0.00274	0.00116	0.00117	90.9883	7.1102	1.89685		1045.32
0.00274	0.0012	0.00116	90.9887	7.1103	1.89629		1048.62
0.00274	0.00119	0.00119	90.9888	7.10993	1.89647		1051.92
0.00274	0.00116	0.00119	90.9892	7.10969	1.89645		1055.23
0.00274	0.00117	0.00117	90.989	7.10971	1.8966		1058.52
0.00274	0.00114	0.00117	90.9895	7.10931	1.89652		1061.83
0.00274	0.00116	0.00115	90.9891	7.10959	1.89663		1065.13
0.00274	0.00118	0.00118	90.9894	7.10918	1.89675		1068.43
0.00274	0.00119	0.00117	90.9894	7.10923	1.8967		1071.73
0.00274	0.00115	0.00117	90.9894	7.10944	1.89659		1075.03
0.00274	0.00117	0.00117	90.9889	7.10973	1.89666		1078.33
0.00274	0.00117	0.00114	90.9893	7.10943	1.89658		1081.63
0.00274	0.00117	0.00115	90.9894	7.10971	1.89625		1084.93
0.00273	0.00118	0.00116	90.9896	7.10922	1.89647		1088.24
0.00274	0.00117	0.00116	90.9898	7.10893	1.89657		1091.54
0.00274	0.00115	0.00117	90.99	7.10909	1.8963		1094.84
0.00274	0.00114	0.00119	90.9901	7.10848	1.89674		1098.14
0.00274	0.00118	0.00116	90.991	7.10798	1.89635		1101.45
0.00274	0.00118	0.00118	90.9902	7.10804	1.89703		1104.74
0.00274	0.00116	0.00116	90.9901	7.10822	1.89696		1108.04
0.00274	0.00116	0.00114	90.9897	7.10851	1.89712		1111.34
0.00274	0.00114	0.00114	90.99	7.1086	1.89682		1114.65
0.00274	0.00117	0.00117	90.9896	7.10909	1.89663		1117.95
0.00274	0.00118	0.00117	90.9895	7.10953	1.89628		1121.25
0.00274	0.00116	0.00116	90.9895	7.10955	1.89631		1124.54
0.00274	0.00116	0.00118	90.9892	7.10925	1.89685		1127.84
0.00274	0.00117	0.00118	90.9892	7.10945	1.89661		1131.14
0.00274	0.00117	0.00118	90.9894	7.10937	1.89655		1134.44
0.00274	0.00118	0.00116	90.9896	7.10944	1.89625		1137.74
0.00274	0.00116	0.00117	90.9898	7.10963	1.8959		1141.04
0.00274	0.00117	0.00117	90.9898	7.10925	1.89623		1144.34
0.00274	0.00116	0.00116	90.9898	7.10938	1.89621		1147.65
0.00274	0.00114	0.00118	90.9896	7.10937	1.89637		1150.94
0.00274	0.00118	0.00115	90.9895	7.10942	1.8964		1154.24
0.00274	0.00114	0.00118	90.9893	7.10937	1.89669		1157.54
0.00274	0.00115	0.00117	90.9893	7.10957	1.89644		1160.84
0.00274	0.00116	0.00117	90.9892	7.10988	1.8962		1164.14
0.00274	0.00114	0.00115	90.989	7.11002	1.89633		1167.45
0.00274	0.00115	0.00118	90.9891	7.11014	1.89606		1170.75
0.00274	0.00115	0.00114	90.9891	7.11044	1.89584		1174.05
0.00274	0.00116	0.00118	90.9891	7.11083	1.89536		1177.35
0.00274	0.00118	0.00116	90.9887	7.11095	1.89573		1180.65
0.00274	0.00114	0.00114	90.9892	7.11058	1.89563		1183.95
0.00274	0.00116	0.00117	90.989	7.11062	1.89568		1187.25
0.00274	0.00115	0.00114	90.9892	7.11069	1.89546		1190.55
0.00274	0.00114	0.00118	90.989	7.11091	1.89543		1193.85
0.00274	0.00116	0.00116	90.9896	7.11079	1.89499		1197.15
0.00274	0.00115	0.00118	90.9896	7.11094	1.89479		1200

## Sheet: Fig 7a
time	groundstate1	OOformation	protonrelease	watersplitting
hours	per diad	per diad	per diad	per diad
0	0	0	0	0
1.45079e-06	0	0	0	0
1.45079e-06	0	0	0	0
1.45079e-06	1	0	0	0
2.50563e-06	1	0	0	0
6.03386e-06	1	0	0	0
7.95172e-06	1	0	0	0
1.37886e-05	1	0	0	0
1.44206e-05	1	0	0	0
1.44206e-05	1	0	0	0
1.44206e-05	1	0	0	0
1.44206e-05	1	0	0	0
0.00245	1	0	1	0
0.00245	1	0	1	0
0.00245	1	0	1	0
0.00245	1	0	1	0
0.00245	1	0	1	0
0.0031	1	1	1	0
0.0031	1	1	1	0
0.0031	1	1	1	0
0.0031	1	1	1	0
0.3121	1	1	1	1
0.3121	1	1	1	1
0.3121	1	1	1	1
0.3121	2	1	1	1
0.31211	2	1	1	1
0.31211	2	1	1	1
0.32246	2	1	2	1
0.32246	2	1	2	1
0.32248	2	1	2	1
0.32248	2	1	2	1
0.32248	2	1	2	1
0.3586	2	2	2	1
0.3586	2	2	2	1
0.3586	2	2	2	1
0.3586	2	2	2	1
0.42393	2	2	2	2
0.42394	2	2	2	2
0.42394	2	2	2	2
0.42394	3	2	2	2
0.42394	3	2	2	2
0.42394	3	2	2	2
0.42395	3	2	2	2
0.42395	3	2	2	2
0.4252	3	2	3	2
0.4252	3	2	3	2
0.4252	3	2	3	2
0.4252	3	2	3	2
0.42912	3	3	3	2
0.42912	3	3	3	2
0.42912	3	3	3	2
0.42912	3	3	3	2
0.60609	3	3	3	3
0.60609	3	3	3	3
0.60609	3	3	3	3
0.60609	4	3	3	3
0.60609	4	3	3	3
0.60609	4	3	3	3
0.60663	4	3	4	3
0.60664	4	3	4	3
0.60664	4	3	4	3
0.60664	4	3	4	3
0.60788	4	4	4	3
0.60789	4	4	4	3
0.60789	4	4	4	3
0.60789	4	4	4	3
1.34983	4	4	4	4
1.34983	4	4	4	4
1.34983	5	4	4	4
1.34983	5	4	4	4
1.34983	5	4	4	4
1.34983	5	4	4	4
1.34983	5	4	4	4
1.37154	5	4	5	4
1.37154	5	4	5	4
1.37154	5	4	5	4
1.37155	5	4	5	4
1.37155	5	4	5	4
1.37155	5	4	5	4
1.3777	5	5	5	4
1.3777	5	5	5	4
1.3777	5	5	5	4
1.3777	5	5	5	4
1.94343	5	5	5	5
1.94344	5	5	5	5
1.94344	6	5	5	5
1.94344	6	5	5	5
1.94344	6	5	5	5
1.95063	6	5	6	5
1.95063	6	5	6	5
1.95063	6	5	6	5
1.95064	6	5	6	5
1.95064	6	5	6	5
1.95065	6	5	6	5
1.95065	6	5	6	5
1.95065	6	5	6	5
1.95065	6	5	6	5
2.0013	6	6	6	5
2.0013	6	6	6	5
2.0013	6	6	6	5
2.0013	6	6	6	5
2.33903	6	6	6	6
2.33903	6	6	6	6
2.33903	6	6	6	6
2.33903	6	6	6	6
2.33903	6	6	6	6
2.33903	7	6	6	6
2.33904	7	6	6	6
2.33904	7	6	6	6
2.33926	7	6	7	6
2.33926	7	6	7	6
2.33926	7	6	7	6
2.34937	7	7	7	6
2.34937	7	7	7	6
2.34937	7	7	7	6
2.34937	7	7	7	6
2.77286	7	7	7	7
2.77286	7	7	7	7
2.77287	7	7	7	7
2.77287	7	7	7	7
2.77287	7	7	7	7
2.77287	8	7	7	7
2.77288	8	7	7	7
2.77288	8	7	7	7
2.77448	8	7	8	7
2.77448	8	7	8	7
2.77448	8	7	8	7
2.78781	8	8	8	7
2.78782	8	8	8	7
2.78782	8	8	8	7
2.78783	8	8	8	7
2.78783	8	8	8	7
2.78783	8	8	8	7
2.81083	8	8	8	8
2.81084	8	8	8	8
2.81084	9	8	8	8
2.81084	9	8	8	8
2.81084	9	8	8	8
2.81084	9	8	8	8
2.82899	9	8	9	8
2.82899	9	8	9	8
2.82899	9	8	9	8
2.82899	9	8	9	8
2.92518	9	9	9	8
2.92518	9	9	9	8
2.92518	9	9	9	8
2.92518	9	9	9	8
2.92518	9	9	9	8
3.18083	9	9	9	9
3.18083	9	9	9	9
3.18083	9	9	9	9
3.18083	10	9	9	9
3.18083	10	9	9	9
3.18083	10	9	9	9
3.18316	10	9	10	9
3.18317	10	9	10	9
3.18317	10	9	10	9
3.18317	10	9	10	9
3.19464	10	10	10	9
3.19464	10	10	10	9
3.19465	10	10	10	9
3.19465	10	10	10	9
3.19465	10	10	10	9
3.56504	10	10	10	10
3.56504	10	10	10	10
3.56504	10	10	10	10
3.56504	11	10	10	10
3.56504	11	10	10	10
3.56504	11	10	10	10
3.57542	11	10	11	10
3.57542	11	10	11	10
3.57542	11	10	11	10
3.57543	11	10	11	10
3.57543	11	10	11	10
3.57543	11	10	11	10
3.57543	11	10	11	10
3.58018	11	11	11	10
3.58019	11	11	11	10
3.58019	11	11	11	10
3.58019	11	11	11	10
3.58019	11	11	11	10
3.83614	11	11	11	11
3.83614	11	11	11	11
3.83614	11	11	11	11
3.83614	12	11	11	11
3.83614	12	11	11	11
3.83917	12	11	12	11
3.83917	12	11	12	11
3.83917	12	11	12	11
3.86851	12	12	12	11
3.86851	12	12	12	11
3.86851	12	12	12	11
4.127	12	12	12	12
4.12701	12	12	12	12
4.12701	13	12	12	12
4.12701	13	12	12	12
4.12701	13	12	12	12
4.12701	13	12	12	12
4.14025	13	12	13	12
4.14025	13	12	13	12
4.14026	13	12	13	12
4.14026	13	12	13	12
4.14026	13	12	13	12
4.14777	13	13	13	12
4.14778	13	13	13	12
4.14778	13	13	13	12
4.27932	13	13	13	13
4.27933	13	13	13	13
4.27933	14	13	13	13
4.27933	14	13	13	13
4.27933	14	13	13	13
4.28435	14	13	14	13
4.28435	14	13	14	13
4.28435	14	13	14	13
4.28435	14	13	14	13
4.30142	14	14	14	13
4.30142	14	14	14	13
4.30142	14	14	14	13
4.30142	14	14	14	13
4.30142	14	14	14	13
5.61346	14	14	14	14
5.61346	14	14	14	14
5.61346	14	14	14	14
5.61346	14	14	14	14
5.61346	14	14	14	14
5.61346	14	14	14	14
5.61347	14	14	14	14
5.61347	15	14	14	14
5.61347	15	14	14	14
5.62928	15	14	15	14
5.62929	15	14	15	14
5.69091	15	15	15	14
5.69091	15	15	15	14
5.69091	15	15	15	14
5.69092	15	15	15	14
5.69092	15	15	15	14
5.69092	15	15	15	14
5.69092	15	15	15	14
5.8782	15	15	15	15
5.8782	15	15	15	15
5.8782	16	15	15	15
5.87821	16	15	15	15
5.87842	16	15	16	15
5.87843	16	15	16	15
5.87843	16	15	16	15
5.92625	16	16	16	15
5.92625	16	16	16	15
5.92625	16	16	16	15
6.03208	16	16	16	16
6.03208	16	16	16	16
6.03208	16	16	16	16
6.03208	17	16	16	16
6.03208	17	16	16	16
6.03809	17	16	17	16
6.0381	17	16	17	16
6.0381	17	16	17	16
6.0381	17	16	17	16
6.08843	17	17	17	16
6.08844	17	17	17	16
6.08844	17	17	17	16
6.08844	17	17	17	16
6.08844	17	17	17	16
6.08845	17	17	17	16
6.08845	17	17	17	16
6.08846	17	17	17	16
6.08846	17	17	17	16
6.69672	17	17	17	17
6.69672	17	17	17	17
6.69673	17	17	17	17
6.69673	18	17	17	17
6.69673	18	17	17	17
6.69673	18	17	17	17
6.7005	18	17	18	17
6.7005	18	17	18	17
6.7005	18	17	18	17
6.7005	18	17	18	17
6.7005	18	17	18	17
6.73235	18	18	18	17
6.73236	18	18	18	17
6.73236	18	18	18	17
6.73236	18	18	18	17
6.73237	18	18	18	17
6.73237	18	18	18	17
6.73237	18	18	18	17
6.79212	18	18	18	18
6.79212	18	18	18	18
6.79212	18	18	18	18
6.79212	19	18	18	18
6.79212	19	18	18	18
6.79213	19	18	18	18
6.81862	19	18	19	18
6.81862	19	18	19	18
6.81862	19	18	19	18
6.81862	19	18	19	18
6.83452	19	19	19	18
6.83453	19	19	19	18
6.83454	19	19	19	18
6.83454	19	19	19	18
7.24615	19	19	19	19
7.24615	19	19	19	19
7.24615	19	19	19	19
7.24615	19	19	19	19
7.24615	20	19	19	19
7.24615	20	19	19	19
7.25153	20	19	20	19
7.25153	20	19	20	19
7.25154	20	19	20	19
7.25154	20	19	20	19
7.25154	20	19	20	19
7.28038	20	20	20	19
7.28038	20	20	20	19
7.28038	20	20	20	19
7.28038	20	20	20	19
7.86933	20	20	20	20
7.86933	20	20	20	20
7.86933	20	20	20	20
7.86933	20	20	20	20
7.86933	21	20	20	20
7.86933	21	20	20	20
7.86933	21	20	20	20
7.86934	21	20	20	20
7.86934	21	20	20	20
7.87159	21	20	21	20
7.87159	21	20	21	20
7.87159	21	20	21	20
7.87447	21	21	21	20
7.87447	21	21	21	20
7.87447	21	21	21	20
8.20704	21	21	21	21
24	21	21	21	21

[truncated: 1 more sheets: Fig 7b]
